# Supplementary material
Source: publisher figshare collection journal article supplement (https://frontiersin.figshare.com/ndownloader/files/13649807)
Supplement: Supplementary file 1 [file 13649807]

Archive with 20 entries (20 files):
- SupplementaryData-bcc-RVE12.dat
- SupplementaryData-bcc-RVE12-CUT12.dat
- SupplementaryData-bcc-RVE12-CUT25.dat
- SupplementaryData-bcc-RVE12-CUT37.dat
- SupplementaryData-bcc-RVE12-CUT50.dat
- SupplementaryData-cub-RVE12.dat
- SupplementaryData-cub-RVE12-CUT16.dat
- SupplementaryData-cub-RVE12-CUT33.dat
- SupplementaryData-cub-RVE12-CUT50.dat
- SupplementaryData-dia-RVE6.dat
- SupplementaryData-dia-RVE6-A10.dat
- SupplementaryData-dia-RVE6-A20.dat
- SupplementaryData-dia-RVE6-A30.dat
- SupplementaryData-dia-RVE6-CUT10.dat
- SupplementaryData-dia-RVE6-CUT20.dat
- SupplementaryData-dia-RVE6-CUT30.dat
- SupplementaryData-dia-RVE6-CUT40.dat
- SupplementaryData-dia-RVE6-CUT50.dat
- SupplementaryData-GA001-RVE6.dat
- SupplementaryData-GA111-RVE6.dat
