# Supplementary material
Source: publisher figshare collection journal article supplement (https://frontiersin.figshare.com/ndownloader/files/13649807)
Supplement: Supplementary file 1 [file 13649807 › SupplementaryData-bcc-RVE12-CUT12.dat]

   z_x/z_bcc     zeta_ini         zeta     zeta_tot    N_0    N_1    N_2    N_3    N_4    N_5    N_6    N_7    N_8      g  N_J,t  g^(i) N_J,t^(i)     z_avg        z_avg        z_avg         g_V*         g_V*     zeta_tot     zeta_tot            E         E/E0     E/E0,bcc     E/E0,bcc     E/E0,bcc           sy       sy/sy0   sy/sy0,bcc   sy/sy0,bcc   sy/sy0,bcc           nu       nu/nu0   nu/nu0,bcc   nu/nu0,bcc
         [-]          [-]          [-]          [-]    [-]    [-]    [-]    [-]    [-]    [-]    [-]    [-]    [-]    [-]    [-]    [-]    [-]          [-]          [-]          [-]          [-]          [-]          [-]          [-]        [MPa]          [-]          [-]          [-]          [-]        [MPa]          [-]          [-]          [-]          [-]          [-]          [-]          [-]          [-]
         RVE          RVE          RVE          RVE    RVE    RVE    RVE    RVE    RVE    RVE    RVE    RVE    RVE    RVE    RVE    RVE    RVE          RVE         ANN3       ANN3gi          RVE       ANN3gi         ANN3       ANN3gi          RVE          RVE          RVE           MC      MC+ANN3          RVE          RVE          RVE           MC      MC+ANN3          RVE          RVE          RVE           MC
    1.000000     0.125143     0.000000     0.125143      0      0      0      2     25    181    603   1197   1051   8189   3925   6377   3059     7.001000     6.889749     7.074151     2.480693     2.537075     0.138781     0.115731   316.500000     0.815511     0.815552     0.820803     0.831337     6.323000     0.792157     0.792197     0.820803     0.809617     0.457000     0.976496     0.976496     0.981378 
    1.000000     0.125143     0.099554     0.212239      0      0      5     31    151    510    966    937    459   6999   3925   5441   3059     6.304000     6.328879     6.233970     2.120207     2.116985     0.208890     0.220754   266.100000     0.685648     0.685683     0.658442     0.671281     5.260000     0.658983     0.659016     0.658442     0.646646     0.443000     0.946581     0.946581     0.941458 
    1.000000     0.125143     0.099554     0.212239      0      0      5     40    157    470    993    945    449   6999   3925   5430   3059     6.300000     6.327922     6.277198     2.120207     2.138599     0.209010     0.215350   266.400000     0.686421     0.686456     0.666781     0.680679     5.249000     0.657605     0.657638     0.666781     0.655275     0.444000     0.948718     0.948718     0.943998 
    1.000000     0.125143     0.100299     0.212890      0      0      7     30    169    505    907    982    459   6998   3925   5456   3059     6.307000     6.330366     6.264693     2.119904     2.132346     0.208704     0.216913   266.200000     0.685906     0.685940     0.664368     0.678608     5.249000     0.657605     0.657638     0.664368     0.652656     0.446000     0.952991     0.952991     0.943269 
    1.000000     0.125143     0.099306     0.212021      0      0      8     30    168    503    919   1001    430   7000   3925   5411   3059     6.294000     6.314781     6.251197     2.120510     2.125599     0.210652     0.218600   266.600000     0.686936     0.686971     0.661765     0.676876     5.266000     0.659734     0.659768     0.661765     0.649857     0.445000     0.950855     0.950855     0.942477 
    1.000000     0.125143     0.099802     0.212456      0      0      3     42    157    511    900    984    462   7000   3925   5458   3059     6.309000     6.313387     6.256712     2.120510     2.128356     0.210827     0.217911   267.100000     0.688225     0.688259     0.662829     0.676195     5.274000     0.660737     0.660770     0.662829     0.650670     0.446000     0.952991     0.952991     0.942801 
    1.000000     0.125143     0.199853     0.299986      0      5     36    133    443    734    901    646    161   5809   3925   4495   3059     5.601000     5.628732     5.616146     1.759720     1.808073     0.296409     0.297982   215.400000     0.555012     0.555040     0.539587     0.556477     4.206000     0.526936     0.526962     0.539587     0.528679     0.425000     0.908120     0.908120     0.899396 
    1.000000     0.125143     0.199853     0.299986      0      1     37    146    416    762    914    593    190   5807   3925   4506   3059     5.604000     5.605786     5.612255     1.759114     1.806127     0.299277     0.298468   214.000000     0.551404     0.551432     0.538841     0.553635     4.208000     0.527186     0.527213     0.538841     0.527374     0.426000     0.910256     0.910256     0.899096 
    1.000000     0.125143     0.199519     0.299693      0      3     30    139    427    777    892    623    168   5812   3925   4487   3059     5.600000     5.591188     5.600085     1.760629     1.800042     0.301102     0.299989   215.200000     0.554496     0.554524     0.536508     0.552202     4.208000     0.527186     0.527213     0.536508     0.524931     0.428000     0.914530     0.914530     0.898156 
    1.000000     0.125143     0.199853     0.299986      1      1     32    143    411    761    955    588    167   5809   3925   4485   3059     5.598000     5.601523     5.601591     1.759720     1.800796     0.299810     0.299801   213.800000     0.550889     0.550917     0.536797     0.551834     4.178000     0.523428     0.523454     0.536797     0.525286     0.425000     0.908120     0.908120     0.898273 
    1.000000     0.125135     0.199441     0.299618      0      6     25    149    398    760    944    615    162   5809   3925   4519   3059     5.610000     5.603664     5.615076     1.759720     1.807538     0.299542     0.298116   213.000000     0.548828     0.548855     0.539382     0.554343     4.172000     0.522676     0.522702     0.539382     0.527413     0.424000     0.905983     0.905983     0.899313 
    1.000000     0.125143     0.299818     0.387441      0     24    106    357    645    897    657    321     52   4622   3925   3550   3059     4.896000     4.878634     4.872729     1.400142     1.436365     0.390171     0.390909   160.000000     0.412265     0.412286     0.398243     0.410828     3.140000     0.393385     0.393405     0.398243     0.385105     0.401000     0.856838     0.856838     0.833879 
    1.000000     0.125143     0.299483     0.387148      0     16    102    340    705    833    705    305     53   4634   3925   3573   3059     4.908000     4.909358     4.878669     1.403777     1.439335     0.386330     0.390166   162.400000     0.418449     0.418470     0.399359     0.412553     3.143000     0.393761     0.393781     0.399359     0.389363     0.401000     0.856838     0.856838     0.834471 
    1.000000     0.125143     0.300314     0.387875      2     17    105    353    659    901    653    308     61   4632   3925   3572   3059     4.900000     4.880742     4.880532     1.403171     1.440266     0.389907     0.389933   160.000000     0.412265     0.412286     0.399710     0.412193     3.146000     0.394137     0.394157     0.399710     0.387053     0.398000     0.850427     0.850427     0.834657 
    1.000000     0.125143     0.301555     0.388961      0     20    116    324    706    847    664    315     67   4624   3925   3587   3059     4.906000     4.927265     4.912098     1.400748     1.456049     0.384092     0.385988   161.000000     0.414842     0.414862     0.405648     0.418950     3.149000     0.394513     0.394532     0.405648     0.395506     0.400000     0.854701     0.854701     0.837783 
    1.000000     0.125143     0.299569     0.387223      1     19    107    329    678    884    694    279     68   4625   3925   3591   3059     4.908000     4.914498     4.910897     1.401051     1.455449     0.385688     0.386138   161.200000     0.415357     0.415378     0.405422     0.417920     3.100000     0.388374     0.388393     0.405422     0.394703     0.398000     0.850427     0.850427     0.837664 
    1.000000     0.125143     0.399209     0.474394      8     60    263    630    812    725    416    127     18   3456   3925   2662   3059     4.210000     4.184999     4.160423     1.046926     1.080212     0.476875     0.479947   110.600000     0.284978     0.284992     0.267299     0.274305     2.135000     0.267477     0.267490     0.267299     0.258746     0.364000     0.777778     0.777778     0.753932 
    1.000000     0.125143     0.399124     0.474319      8     78    284    577    824    727    415    125     21   3462   3925   2634   3059     4.198000     4.253757     4.225659     1.048743     1.112830     0.468280     0.471793   108.700000     0.280082     0.280097     0.278969     0.285266     2.108000     0.264094     0.264107     0.278969     0.272366     0.352000     0.752137     0.752137     0.762037 
    1.000000     0.125143     0.400116     0.475188      8     58    279    601    819    760    407    113     14   3454   3925   2636   3059     4.197000     4.211178     4.201222     1.046320     1.100611     0.473603     0.474847   109.300000     0.281628     0.281643     0.274587     0.278736     2.120000     0.265598     0.265611     0.274587     0.267449     0.364000     0.777778     0.777778     0.759020 
    1.000000     0.125143     0.399782     0.474895      7     73    246    625    807    760    393    135     13   3461   3925   2673   3059     4.209000     4.187900     4.174985     1.048441     1.087492     0.476512     0.478127   110.700000     0.285236     0.285250     0.269896     0.276354     2.167000     0.271486     0.271499     0.269896     0.258937     0.359000     0.767094     0.767094     0.755756 
    1.000000     0.125143     0.400365     0.475405      7     67    268    611    813    733    427    107     26   3456   3925   2671   3059     4.208000     4.213438     4.202460     1.046926     1.101230     0.473320     0.474693   110.800000     0.285493     0.285508     0.274809     0.279759     2.194000     0.274868     0.274882     0.274809     0.269030     0.368000     0.786325     0.786325     0.759174 
    1.000000     0.125135     0.499504     0.562133     28    207    534    802    733    494    211     44      6   2325   3925   1754   3059     3.500000     3.523400     3.511018     0.704312     0.755509     0.559575     0.561123    62.900000     0.162072     0.162080     0.157513     0.161957     1.289000     0.161488     0.161496     0.157513     0.155480     0.316000     0.675214     0.675214     0.663163 
    1.000000     0.125143     0.499919     0.562501     27    189    521    815    783    472    201     47      4   2319   3925   1783   3059     3.509000     3.514611     3.517322     0.702495     0.758661     0.560674     0.560335    65.700000     0.169286     0.169295     0.158505     0.163768     1.357000     0.170008     0.170016     0.158505     0.158577     0.324000     0.692308     0.692308     0.664142 
    1.000000     0.125143     0.499833     0.562425     40    199    500    818    749    513    200     36      4   2324   3925   1762   3059     3.497000     3.497924     3.509266     0.704009     0.754633     0.562759     0.561342    64.100000     0.165164     0.165172     0.157238     0.159282     1.334000     0.167126     0.167134     0.157238     0.158278     0.319000     0.681624     0.681624     0.662891 
    1.000000     0.125143     0.500415     0.562935     45    191    483    819    775    504    199     39      4   2333   3925   1795   3059     3.509000     3.510278     3.529185     0.706736     0.764593     0.561215     0.558852    65.200000     0.167998     0.168006     0.160376     0.163042     1.353000     0.169506     0.169515     0.160376     0.162117     0.323000     0.690171     0.690171     0.665978 
    1.000000     0.125135     0.500248     0.562785     25    169    551    814    798    476    174     45      7   2312   3925   1753   3059     3.498000     3.500440     3.514369     0.700374     0.757184     0.562445     0.560704    62.500000     0.161041     0.161049     0.158040     0.161883     1.288000     0.161363     0.161371     0.158040     0.159872     0.311000     0.664530     0.664530     0.663684 
    1.000000     0.125143     0.599798     0.649880    102    410    793    838    578    277     50     11      0   1251   3925    925   3059     2.806000     2.859569     2.878757     0.378965     0.439379     0.642554     0.640155    28.200000     0.072662     0.072665     0.069917     0.071662     0.682000     0.085442     0.085447     0.069917     0.087014     0.272000     0.581197     0.581197     0.552786 
    1.000000     0.125135     0.599553     0.649663     89    391    835    886    551    238     57     11      1   1229   3925    879   3059     2.792000     2.706975     2.765098     0.372301     0.382549     0.661628     0.654363    26.100000     0.067251     0.067254     0.057316     0.063753     0.618000     0.077424     0.077428     0.057316     0.071243     0.263000     0.561966     0.561966     0.529893 
    1.000000     0.125143     0.600962     0.650899     98    390    800    869    583    249     63      6      1   1260   3925    952   3059     2.812000     2.818035     2.868421     0.381692     0.434210     0.647746     0.641447    28.000000     0.072146     0.072150     0.068724     0.071292     0.649000     0.081308     0.081312     0.068724     0.087369     0.272000     0.581197     0.581197     0.550749 
    1.000000     0.125143     0.600380     0.650390     99    424    794    827    585    245     76      9      0   1252   3925    934   3059     2.804000     2.913449     2.906519     0.379268     0.453260     0.635819     0.636685    27.900000     0.071889     0.071892     0.073166     0.076721     0.653000     0.081809     0.081813     0.073166     0.088378     0.287000     0.613248     0.613248     0.558214 
    1.000000     0.125143     0.600046     0.650097     89    427    810    845    558    243     77      9      1   1242   3925    910   3059     2.799000     2.831066     2.845411     0.376239     0.422705     0.646117     0.644324    26.600000     0.068539     0.068542     0.066102     0.071963     0.632000     0.079178     0.079182     0.066102     0.079413     0.264000     0.564103     0.564103     0.546183 
    1.000000     0.125143     0.700679     0.738137    283    746    953    665    295     98     17      2      0    322   3925    220   3059     2.103000     2.125571     2.215097     0.097543     0.107548     0.734304     0.723113    10.000000     0.025767     0.025768     0.014202     0.023801     0.279000     0.034954     0.034955     0.014202     0.032456     0.275000     0.587607     0.587607     0.399705 
    1.000000     0.125143     0.700020     0.737560    299    728    939    677    317     85     12      2      0    322   3925    232   3059     2.097000     2.211640     2.257429     0.097543     0.128715     0.723545     0.717821     9.200000     0.023705     0.023706     0.016407     0.022618     0.261000     0.032699     0.032700     0.016407     0.033804     0.284000     0.606838     0.606838     0.411182 
    1.000000     0.125143     0.699524     0.737126    252    741    980    708    290     74     13      1      0    280   3925    181   3059     2.105000     2.043017     2.151213     0.084820     0.075606     0.744623     0.731098     8.200000     0.021129     0.021130     0.011225     0.019127     0.234000     0.029316     0.029317     0.011225     0.026469     0.263000     0.561966     0.561966     0.381775 
    1.000000     0.125143     0.700096     0.737627    264    793    937    654    301     93     16      1      0    279   3925    174   3059     2.093000     2.182678     2.198572     0.084517     0.099286     0.727165     0.725179     9.500000     0.024478     0.024479     0.013392     0.021178     0.259000     0.032448     0.032450     0.013392     0.032780     0.277000     0.591880     0.591880     0.395140 
    1.000000     0.125143     0.700020     0.737560    270    780    921    659    320     88     17      4      0    309   3925    232   3059     2.108000     2.276426     2.277858     0.093605     0.138929     0.715447     0.715268     9.400000     0.024221     0.024222     0.017537     0.025051     0.267000     0.033450     0.033452     0.017537     0.032281     0.273000     0.583333     0.583333     0.416613 
    1.000000     0.125143     0.800892     0.825809    650   1132    824    348     92     11      1      1      0   -409   3925   -349   3059     1.393000     1.557705     1.430572    -0.123898    -0.284714     0.805287     0.821179     2.400000     0.006184     0.006184     0.000000     0.001472     0.071000     0.008895     0.008895     0.000000     0.002230     0.353000     0.754274     0.754274     0.026566 
    1.000000     0.125143     0.800147     0.825157    650   1119    828    361     86     14      1      0      0   -403   3925   -355   3059     1.398000     1.326138     1.395477    -0.122081    -0.302262     0.834233     0.825565     2.500000     0.006442     0.006442     0.000000     0.003088     0.073000     0.009146     0.009146     0.000000     0.005707     0.353000     0.754274     0.754274     0.000000 
    1.000000     0.125143     0.800395     0.825374    685   1097    820    338     92     22      5      0      0   -376   3925   -339   3059     1.392000     1.444718     1.433336    -0.113902    -0.283332     0.819410     0.820833     2.300000     0.005926     0.005927     0.000000     0.008200     0.068000     0.008519     0.008520     0.000000     0.009842     0.349000     0.745726     0.745726     0.032466 
    1.000000     0.125135     0.800559     0.825516    672   1082    819    377     95     14      0      0      0   -376   3925   -303   3059     1.406000     1.420157     1.468829    -0.113902    -0.265586     0.822480     0.816396     2.500000     0.006442     0.006442     0.000003     0.002076     0.075000     0.009396     0.009397     0.000003     0.005573     0.352000     0.752137     0.752137     0.079488 
    1.000000     0.125143     0.799574     0.824656    643   1120    851    341     87     16      1      0      0   -402   3925   -368   3059     1.399000     1.383386     1.385124    -0.121778    -0.307438     0.827077     0.826860     2.400000     0.006184     0.006184     0.000000     0.004296     0.071000     0.008895     0.008895     0.000000     0.007261     0.356000     0.760684     0.760684     0.000000 
