# Supplementary material
Source: publisher figshare collection journal article supplement (https://frontiersin.figshare.com/ndownloader/files/13649807)
Supplement: Supplementary file 1 [file 13649807 › SupplementaryData-bcc-RVE12-CUT25.dat]

   z_x/z_bcc     zeta_ini         zeta     zeta_tot    N_0    N_1    N_2    N_3    N_4    N_5    N_6    N_7    N_8      g  N_J,t  g^(i) N_J,t^(i)     z_avg        z_avg        z_avg         g_V*         g_V*     zeta_tot     zeta_tot            E         E/E0     E/E0,bcc     E/E0,bcc     E/E0,bcc           sy       sy/sy0   sy/sy0,bcc   sy/sy0,bcc   sy/sy0,bcc           nu       nu/nu0   nu/nu0,bcc   nu/nu0,bcc
         [-]          [-]          [-]          [-]    [-]    [-]    [-]    [-]    [-]    [-]    [-]    [-]    [-]    [-]    [-]    [-]    [-]          [-]          [-]          [-]          [-]          [-]          [-]          [-]        [MPa]          [-]          [-]          [-]          [-]        [MPa]          [-]          [-]          [-]          [-]          [-]          [-]          [-]          [-]
         RVE          RVE          RVE          RVE    RVE    RVE    RVE    RVE    RVE    RVE    RVE    RVE    RVE    RVE    RVE    RVE    RVE          RVE         ANN3       ANN3gi          RVE       ANN3gi         ANN3       ANN3gi          RVE          RVE          RVE           MC      MC+ANN3          RVE          RVE          RVE           MC      MC+ANN3          RVE          RVE          RVE           MC
    1.000000     0.249994     0.000000     0.249994      1      7      5     61    259    646    972    816    292   6476   3925   5025   3059     5.997000     6.023342     5.915973     1.961774     1.957987     0.247082     0.260503   244.300000     0.629477     0.629509     0.597175     0.612032     4.799000     0.601228     0.601258     0.597175     0.585176     0.440000     0.940171     0.940171     0.921163 
    1.000000     0.250002     0.099823     0.324869      3      8     50    149    520    857    842    506    124   5474   3925   4216   3059     5.396000     5.394567     5.437528     1.658238     1.718764     0.325679     0.320309   199.400000     0.513785     0.513811     0.505397     0.521347     3.898000     0.488349     0.488373     0.505397     0.494569     0.420000     0.897436     0.897436     0.885187 
    1.000000     0.250002     0.099533     0.324652      3      5     39    170    509    842    888    484    119   5471   3925   4214   3059     5.396000     5.382859     5.415205     1.657330     1.707603     0.327143     0.323099   200.700000     0.517135     0.517161     0.501132     0.516364     3.935000     0.492984     0.493009     0.501132     0.490123     0.424000     0.905983     0.905983     0.883345 
    1.000000     0.250002     0.099054     0.324293      1     10     42    167    481    887    840    513    118   5469   3925   4232   3059     5.403000     5.366105     5.436172     1.656724     1.718086     0.329237     0.320478   200.500000     0.516619     0.516645     0.505138     0.519920     3.900000     0.488599     0.488624     0.505138     0.492950     0.421000     0.899573     0.899573     0.885076 
    1.000000     0.250002     0.099923     0.324944      4      7     36    195    487    847    857    487    139   5470   3925   4223   3059     5.397000     5.366425     5.408426     1.657027     1.704213     0.329197     0.323947   199.300000     0.513527     0.513553     0.499837     0.513934     3.904000     0.489100     0.489125     0.499837     0.488017     0.420000     0.897436     0.897436     0.882783 
    1.000000     0.250002     0.100692     0.325521      2      7     41    183    487    894    816    502    127   5472   3925   4197   3059     5.388000     5.337855     5.403005     1.657633     1.701503     0.332768     0.324624   198.300000     0.510951     0.510976     0.498802     0.513058     3.855000     0.482962     0.482986     0.498802     0.486407     0.418000     0.893162     0.893162     0.882333 
    1.000000     0.250002     0.200325     0.400246      3     17    125    372    725    861    648    264     44   4467   3925   3423   3059     4.798000     4.804375     4.774701     1.353188     1.387350     0.399453     0.403162   152.800000     0.393713     0.393733     0.379862     0.392053     2.944000     0.368830     0.368848     0.379862     0.369415     0.400000     0.854701     0.854701     0.823937 
    1.000000     0.249994     0.199944     0.399953      6     24    122    366    706    893    623    264     55   4467   3925   3435   3059     4.799000     4.812610     4.795995     1.353188     1.397997     0.398424     0.400501   153.700000     0.396032     0.396052     0.383847     0.395737     2.969000     0.371962     0.371981     0.383847     0.372293     0.395000     0.844017     0.844017     0.826124 
    1.000000     0.249994     0.199365     0.399519      3     23    129    369    727    853    625    279     51   4464   3925   3418   3059     4.796000     4.813655     4.779873     1.352279     1.389936     0.398293     0.402516   156.100000     0.402216     0.402236     0.380829     0.393306     3.046000     0.381609     0.381628     0.380829     0.370237     0.403000     0.861111     0.861111     0.824470 
    1.000000     0.249994     0.199365     0.399519      4     24    118    379    729    855    634    262     54   4467   3925   3409   3059     4.792000     4.798346     4.761796     1.353188     1.380898     0.400207     0.404775   154.400000     0.397836     0.397856     0.377448     0.389563     2.997000     0.375470     0.375489     0.377448     0.367068     0.394000     0.841880     0.841880     0.822604 
    1.000000     0.250002     0.199846     0.399886      3     18    121    372    746    855    626    274     44   4469   3925   3407   3059     4.793000     4.797024     4.760862     1.353794     1.380431     0.400372     0.404892   154.200000     0.397320     0.397340     0.377274     0.389703     3.005000     0.376472     0.376491     0.377274     0.367046     0.395000     0.844017     0.844017     0.822508 
    1.000000     0.249994     0.299866     0.474895      9     62    279    630    805    703    418    132     21   3469   3925   2631   3059     4.199000     4.186249     4.142539     1.050864     1.071270     0.476719     0.482183   108.600000     0.279825     0.279839     0.264115     0.272135     2.114000     0.264846     0.264859     0.264115     0.255394     0.364000     0.777778     0.777778     0.751680 
    1.000000     0.250002     0.298901     0.474177      9     58    272    590    847    754    391    125     13   3480   3925   2639   3059     4.202000     4.220580     4.211722     1.054196     1.105861     0.472427     0.473535   109.800000     0.282917     0.282931     0.276469     0.281609     2.162000     0.270859     0.270873     0.276469     0.269285     0.354000     0.756410     0.756410     0.760319 
    1.000000     0.249994     0.300635     0.475472      5     67    266    604    873    684    423    125     12   3463   3925   2621   3059     4.195000     4.198703     4.170216     1.049046     1.085108     0.475162     0.478723   109.500000     0.282144     0.282158     0.269045     0.276503     2.133000     0.267226     0.267240     0.269045     0.264269     0.360000     0.769231     0.769231     0.755159 
    1.000000     0.250002     0.299090     0.474319     10     57    248    610    856    753    394    115     16   3475   3925   2663   3059     4.207000     4.193771     4.198451     1.052682     1.099225     0.475779     0.475194   111.000000     0.286009     0.286023     0.274091     0.278461     2.207000     0.276497     0.276511     0.274091     0.268065     0.361000     0.771368     0.771368     0.758677 
    1.000000     0.249994     0.299287     0.474461     16     66    273    567    882    697    404    132     22   3487   3925   2649   3059     4.201000     4.254381     4.238263     1.056317     1.119131     0.468202     0.470217   108.600000     0.279825     0.279839     0.281233     0.288546     2.132000     0.267101     0.267114     0.281233     0.276631     0.356000     0.760684     0.760684     0.763583 
    1.000000     0.249994     0.400078     0.550055     17    172    492    773    790    534    223     52      6   2497   3925   1913   3059     3.614000     3.637939     3.652459     0.756416     0.826229     0.545258     0.543443    68.000000     0.175213     0.175221     0.180181     0.183467     1.395000     0.174768     0.174777     0.180181     0.179361     0.321000     0.685897     0.685897     0.684624 
    1.000000     0.250002     0.399013     0.549261     25    157    484    757    869    520    196     48      3   2492   3925   1862   3059     3.599000     3.643361     3.672530     0.754901     0.836265     0.544580     0.540934    65.600000     0.169029     0.169037     0.183465     0.184456     1.360000     0.170383     0.170392     0.183465     0.189191     0.314000     0.670940     0.670940     0.687587 
    1.000000     0.250002     0.399882     0.549913     32    158    488    759    825    543    198     53      3   2508   3925   1875   3059     3.599000     3.644742     3.665967     0.759748     0.832984     0.544407     0.541754    66.400000     0.171090     0.171099     0.182390     0.184066     1.365000     0.171010     0.171018     0.182390     0.183714     0.318000     0.679487     0.679487     0.686620 
    1.000000     0.250002     0.399403     0.549554     34    133    462    875    787    500    220     42      6   2506   3925   1859   3059     3.593000     3.476179     3.480469     0.759142     0.740234     0.565478     0.564941    69.700000     0.179593     0.179602     0.152735     0.157673     1.428000     0.178903     0.178912     0.152735     0.152376     0.322000     0.688034     0.688034     0.658391 
    1.000000     0.250002     0.399592     0.549696     19    161    485    793    833    495    226     40      7   2489   3925   1868   3059     3.599000     3.603620     3.611674     0.753993     0.805837     0.549548     0.548541    67.600000     0.174182     0.174191     0.173558     0.176467     1.402000     0.175645     0.175654     0.173558     0.178319     0.321000     0.685897     0.685897     0.678541 
    1.000000     0.250002     0.499616     0.624713     85    316    716    856    656    330     85     12      3   1582   3925   1174   3059     3.010000     3.062610     3.077021     0.479235     0.538510     0.617174     0.615372    36.800000     0.094821     0.094826     0.094476     0.095403     0.810000     0.101478     0.101483     0.094476     0.109554     0.279000     0.596154     0.596154     0.590258 
    1.000000     0.250002     0.498936     0.624203     72    326    734    876    651    276    106     17      1   1572   3925   1135   3059     2.997000     3.025823     3.011507     0.476206     0.505753     0.621772     0.623562    36.000000     0.092760     0.092764     0.086021     0.092410     0.797000     0.099850     0.099855     0.086021     0.094826     0.292000     0.623932     0.623932     0.578200 
    1.000000     0.249994     0.500290     0.625214     98    351    680    845    651    315    102     15      2   1591   3925   1165   3059     2.994000     3.089277     3.075994     0.481962     0.537997     0.613840     0.615501    36.800000     0.094821     0.094826     0.094341     0.097933     0.778000     0.097469     0.097474     0.094341     0.105670     0.290000     0.619658     0.619658     0.590072 
    1.000000     0.249994     0.500579     0.625431     75    345    706    855    669    299     97     12      1   1567   3925   1141   3059     2.997000     3.076898     3.061447     0.474691     0.530724     0.615388     0.617319    34.400000     0.088637     0.088641     0.092437     0.094416     0.767000     0.096091     0.096096     0.092437     0.106932     0.271000     0.579060     0.579060     0.587420 
    1.000000     0.249994     0.499710     0.624780     89    309    728    851    685    302     84     11      0   1576   3925   1127   3059     2.991000     3.083572     3.070652     0.477418     0.535326     0.614553     0.616168    35.600000     0.091729     0.091734     0.093640     0.092744     0.774000     0.096968     0.096973     0.093640     0.111468     0.289000     0.617521     0.617521     0.589100 
    1.000000     0.249994     0.598864     0.699145    160    631    892    787    415    133     35      6      0    695   3925    482   3059     2.404000     2.413351     2.470406     0.210536     0.235203     0.698331     0.691199    15.300000     0.039423     0.039425     0.030349     0.038775     0.389000     0.048735     0.048737     0.030349     0.044828     0.265000     0.566239     0.566239     0.464772 
    1.000000     0.250002     0.600987     0.700741    193    564    951    729    452    136     31      2      1    716   3925    501   3059     2.402000     2.628292     2.603143     0.216898     0.301572     0.671464     0.674607    13.900000     0.035816     0.035817     0.041428     0.042402     0.359000     0.044976     0.044978     0.041428     0.062344     0.250000     0.534188     0.534188     0.495232 
    1.000000     0.249994     0.600212     0.700156    168    634    897    766    411    153     29      1      0    693   3925    460   3059     2.392000     2.416185     2.469623     0.209930     0.234811     0.697977     0.691297    14.000000     0.036073     0.036075     0.030289     0.035603     0.369000     0.046229     0.046231     0.030289     0.052517     0.258000     0.551282     0.551282     0.464587 
    1.000000     0.250002     0.600408     0.700307    180    556    975    728    454    136     28      2      0    718   3925    528   3059     2.409000     2.625509     2.628502     0.217504     0.314251     0.671811     0.671437    15.000000     0.038650     0.038652     0.043748     0.043842     0.389000     0.048735     0.048737     0.043748     0.065731     0.263000     0.561966     0.561966     0.500831 
    1.000000     0.249994     0.598574     0.698928    171    611    927    758    398    159     32      3      0    709   3925    462   3059     2.399000     2.396220     2.460235     0.214777     0.230118     0.700472     0.692471    13.000000     0.033497     0.033498     0.029574     0.036953     0.000000     0.000000     0.000000     0.029574     0.048923     0.249000     0.532051     0.532051     0.462353 
    1.000000     0.250002     0.700041     0.775032    366    937    984    524    209     34      5      0      0    -40   3925    -88   3059     1.802000     2.076223     1.921868    -0.012117    -0.039066     0.740472     0.759766     4.100000     0.010564     0.010565     0.003794     0.004864     0.116000     0.014533     0.014533     0.003794     0.012534     0.287000     0.613248     0.613248     0.309885 
    1.000000     0.250002     0.700331     0.775249    383    961    915    530    207     59      4      0      0    -16   3925    -56   3059     1.807000     1.923365     1.912802    -0.004847    -0.043599     0.759579     0.760900     4.500000     0.011595     0.011596     0.003597     0.011794     0.129000     0.016161     0.016162     0.003597     0.022375     0.289000     0.617521     0.617521     0.306742 
    1.000000     0.250002     0.699462     0.774597    401    883    993    536    200     42      4      0      0      0   3925    -65   3059     1.802000     1.928527     1.899909     0.000000    -0.050046     0.758934     0.762511     4.100000     0.010564     0.010565     0.003328     0.008455     0.114000     0.014282     0.014283     0.003328     0.016236     0.277000     0.591880     0.591880     0.302224 
    1.000000     0.249994     0.699844     0.774881    430    867    945    580    191     43      3      0      0      5   3925    -51   3059     1.796000     1.721014     1.864233     0.001515    -0.067884     0.784873     0.766971     4.200000     0.010822     0.010822     0.002651     0.009455     0.122000     0.015284     0.015285     0.002651     0.015178     0.284000     0.606838     0.606838     0.289412 
    1.000000     0.250002     0.700910     0.775683    365    971    958    522    192     45      6      0      0    -46   3925   -108   3059     1.792000     1.893510     1.846781    -0.013935    -0.076610     0.763311     0.769152     3.900000     0.010049     0.010049     0.002354     0.009471     0.110000     0.013781     0.013782     0.002354     0.016443     0.283000     0.604701     0.604701     0.282966 
