# Supplementary material
Source: publisher figshare collection journal article supplement (https://frontiersin.figshare.com/ndownloader/files/13649807)
Supplement: Supplementary file 1 [file 13649807 › SupplementaryData-bcc-RVE12-CUT37.dat]

   z_x/z_bcc     zeta_ini         zeta     zeta_tot    N_0    N_1    N_2    N_3    N_4    N_5    N_6    N_7    N_8      g  N_J,t  g^(i) N_J,t^(i)     z_avg        z_avg        z_avg         g_V*         g_V*     zeta_tot     zeta_tot            E         E/E0     E/E0,bcc     E/E0,bcc     E/E0,bcc           sy       sy/sy0   sy/sy0,bcc   sy/sy0,bcc   sy/sy0,bcc           nu       nu/nu0   nu/nu0,bcc   nu/nu0,bcc
         [-]          [-]          [-]          [-]    [-]    [-]    [-]    [-]    [-]    [-]    [-]    [-]    [-]    [-]    [-]    [-]    [-]          [-]          [-]          [-]          [-]          [-]          [-]          [-]        [MPa]          [-]          [-]          [-]          [-]        [MPa]          [-]          [-]          [-]          [-]          [-]          [-]          [-]          [-]
         RVE          RVE          RVE          RVE    RVE    RVE    RVE    RVE    RVE    RVE    RVE    RVE    RVE    RVE    RVE    RVE    RVE          RVE         ANN3       ANN3gi          RVE       ANN3gi         ANN3       ANN3gi          RVE          RVE          RVE           MC      MC+ANN3          RVE          RVE          RVE           MC      MC+ANN3          RVE          RVE          RVE           MC
    1.000000     0.375721     0.000000     0.375721      6     20     92    292    643    904    695    328     79   4762   3925   3683   3059     4.992000     4.998720     5.004232     1.442552     1.502116     0.375160     0.374471   166.200000     0.428240     0.428262     0.423022     0.436214     3.212000     0.402405     0.402426     0.423022     0.411471     0.403000     0.861111     0.861111     0.846721 
    1.000000     0.375721     0.099534     0.437859     19     33    189    462    811    829    478    204     34   3957   3925   3044   3059     4.496000     4.543627     4.516889     1.198694     1.258444     0.432047     0.435389   129.500000     0.333677     0.333694     0.331979     0.341826     0.000000     0.000000     0.000000     0.331979     0.321708     0.375000     0.801282     0.801282     0.796226 
    1.000000     0.375730     0.099415     0.437792     16     28    190    477    801    836    504    170     37   3949   3925   3013   3059     4.489000     4.522028     4.492161     1.196270     1.246080     0.434747     0.438480   129.800000     0.334450     0.334467     0.327428     0.335454     2.509000     0.314332     0.314348     0.327428     0.318476     0.375000     0.801282     0.801282     0.793445 
    1.000000     0.375721     0.099655     0.437934     18     25    187    476    823    788    527    187     28   3957   3925   3038   3059     4.496000     4.526387     4.491124     1.198694     1.245562     0.434202     0.438609   129.000000     0.332389     0.332405     0.327238     0.337116     2.458000     0.307943     0.307958     0.327238     0.319279     0.376000     0.803419     0.803419     0.793328 
    1.000000     0.375721     0.100230     0.438293     28     24    193    471    784    849    500    175     35   3956   3925   3015   3059     4.482000     4.532455     4.503932     1.198391     1.251966     0.433443     0.437009   130.900000     0.337284     0.337301     0.329594     0.337676     2.536000     0.317715     0.317731     0.329594     0.319423     0.381000     0.814103     0.814103     0.794772 
    1.000000     0.375721     0.100578     0.438510     20     32    194    457    808    837    487    193     31   3952   3925   3025   3059     4.488000     4.544947     4.517991     1.197179     1.258996     0.431882     0.435251   130.100000     0.335223     0.335240     0.332182     0.341386     2.489000     0.311827     0.311842     0.332182     0.322268     0.376000     0.803419     0.803419     0.796350 
    1.000000     0.375721     0.201156     0.501299     38     71    335    689    799    676    350     90     11   3156   3925   2396   3059     3.989000     3.991321     3.984691     0.956047     0.992345     0.501085     0.501914    94.100000     0.242463     0.242475     0.236332     0.240704     1.830000     0.229266     0.229277     0.236332     0.229525     0.349000     0.745726     0.745726     0.731236 
    1.000000     0.375721     0.198266     0.499495     33     76    350    634    849    685    328     95      9   3155   3925   2380   3059     3.990000     4.055330     4.061060     0.955744     1.030530     0.493084     0.492368    92.600000     0.238598     0.238610     0.249699     0.252946     1.756000     0.219995     0.220006     0.249699     0.245513     0.338000     0.722222     0.722222     0.741257 
    1.000000     0.375721     0.199069     0.499996     27     61    338    678    861    662    334     82     16   3156   3925   2394   3059     3.998000     3.994827     4.008030     0.956047     1.004015     0.500647     0.498996    94.100000     0.242463     0.242475     0.240401     0.243623     1.839000     0.230393     0.230405     0.240401     0.238282     0.344000     0.735043     0.735043     0.734325 
    1.000000     0.375721     0.198614     0.499712     31     62    358    670    834    671    311    111     11   3153   3925   2374   3059     3.992000     4.006931     3.995543     0.955138     0.997772     0.499134     0.500557    93.000000     0.239629     0.239641     0.238222     0.244124     1.808000     0.226510     0.226521     0.238222     0.230078     0.340000     0.726496     0.726496     0.732675 
    1.000000     0.375721     0.200112     0.500647     29     88    339    657    828    649    371     88     10   3153   3925   2398   3059     3.993000     4.037094     4.027196     0.955138     1.013598     0.495363     0.496601    94.400000     0.243236     0.243249     0.243754     0.248537     1.864000     0.233525     0.233537     0.243754     0.240361     0.347000     0.741453     0.741453     0.736844 
    1.000000     0.375721     0.299540     0.562718     62    156    495    804    801    542    163     34      2   2371   3925   1785   3059     3.499000     3.516495     3.572104     0.718247     0.786052     0.560438     0.553487    61.800000     0.159237     0.159245     0.167197     0.165239     1.274000     0.159609     0.159617     0.167197     0.173178     0.309000     0.660256     0.660256     0.672558 
    1.000000     0.375721     0.299192     0.562501     58    148    555    807    765    477    189     58      2   2367   3925   1754   3059     3.491000     3.511845     3.500417     0.717035     0.750209     0.561019     0.562448    62.300000     0.160526     0.160534     0.155850     0.162305     1.291000     0.161739     0.161747     0.155850     0.152185     0.309000     0.660256     0.660256     0.661513 
    1.000000     0.375721     0.300690     0.563436     57    160    552    776    769    510    189     40      6   2366   3925   1766   3059     3.491000     3.558798     3.577572     0.716732     0.788786     0.555150     0.552804    59.400000     0.153053     0.153061     0.168072     0.169572     1.211000     0.151716     0.151724     0.168072     0.170299     0.310000     0.662393     0.662393     0.673390 
    1.000000     0.375721     0.300235     0.563152     50    153    558    804    764    492    187     47      4   2351   3925   1753   3059     3.491000     3.511921     3.517457     0.712188     0.758729     0.561010     0.560318    61.300000     0.157949     0.157957     0.158526     0.162582     1.259000     0.157730     0.157738     0.158526     0.157674     0.310000     0.662393     0.662393     0.664163 
    1.000000     0.375721     0.299192     0.562501     50    142    554    805    795    489    182     37      5   2366   3925   1749   3059     3.492000     3.511761     3.532784     0.716732     0.766392     0.561030     0.558402    62.200000     0.160268     0.160276     0.160945     0.162752     1.285000     0.160987     0.160995     0.160945     0.165482     0.312000     0.666667     0.666667     0.666534 
    1.000000     0.375721     0.400814     0.625941     93    294    751    876    618    317     96     13      1   1584   3925   1161   3059     2.993000     2.976333     3.014397     0.479841     0.507198     0.627958     0.623200    33.400000     0.086060     0.086065     0.086387     0.090979     0.728000     0.091205     0.091210     0.086387     0.097381     0.254000     0.542735     0.542735     0.578738 
    1.000000     0.375721     0.399997     0.625431    101    280    733    893    632    312     87     20      1   1602   3925   1178   3059     3.002000     2.964668     3.003845     0.485294     0.501923     0.629417     0.624519    35.200000     0.090698     0.090703     0.085053     0.091148     0.792000     0.099223     0.099228     0.085053     0.093165     0.277000     0.591880     0.591880     0.576769 
    1.000000     0.375721     0.400118     0.625506     97    302    704    886    650    308     94     15      3   1606   3925   1193   3059     3.008000     3.012282     3.039595     0.486505     0.519797     0.623465     0.620051    36.100000     0.093017     0.093022     0.089607     0.094102     0.772000     0.096718     0.096722     0.089607     0.100825     0.261000     0.557692     0.557692     0.583407 
    1.000000     0.375721     0.401737     0.626517    106    295    734    868    633    328     73     21      1   1588   3925   1152   3059     2.985000     2.995947     3.021299     0.481053     0.510649     0.625507     0.622338    33.900000     0.087349     0.087353     0.087264     0.091489     0.709000     0.088825     0.088829     0.087264     0.096387     0.277000     0.591880     0.591880     0.580022 
    1.000000     0.375721     0.397683     0.623986     80    308    737    887    646    285     94     17      5   1587   3925   1126   3059     2.999000     2.999264     2.989968     0.480750     0.494984     0.625092     0.626254    33.900000     0.087349     0.087353     0.083312     0.089406     0.756000     0.094713     0.094718     0.083312     0.092608     0.270000     0.576923     0.576923     0.574168 
    1.000000     0.375721     0.499077     0.687284    179    529    856    833    473    144     38      7      0    892   3925    603   3059     2.494000     2.517511     2.576590     0.270214     0.288295     0.685311     0.677926    14.300000     0.036846     0.036848     0.039068     0.045514     0.356000     0.044600     0.044603     0.039068     0.053644     0.218000     0.465812     0.465812     0.489297 
    1.000000     0.375721     0.498140     0.686700    176    502    925    794    454    159     44      4      1    892   3925    598   3059     2.499000     2.546403     2.595378     0.270214     0.297689     0.681700     0.675578    14.900000     0.038392     0.038394     0.040731     0.047166     0.391000     0.048985     0.048988     0.040731     0.057863     0.230000     0.491453     0.491453     0.493504 
    1.000000     0.375721     0.501044     0.688512    185    504    910    793    451    168     42      6      0    892   3925    629   3059     2.498000     2.536038     2.611209     0.270214     0.305604     0.682995     0.673599    15.300000     0.039423     0.039425     0.042159     0.049281     0.392000     0.049110     0.049113     0.042159     0.058506     0.237000     0.506410     0.506410     0.497020 
    1.000000     0.375721     0.499425     0.687502    176    480    948    813    453    155     30      4      0    874   3925    583   3059     2.488000     2.472490     2.559633     0.264761     0.279817     0.690939     0.680046    15.700000     0.040453     0.040456     0.037599     0.042801     0.392000     0.049110     0.049113     0.037599     0.057355     0.248000     0.529915     0.529915     0.485467 
    1.000000     0.375721     0.499077     0.687284    178    528    896    801    429    176     45      6      0    869   3925    606   3059     2.495000     2.457674     2.558205     0.263246     0.279103     0.692791     0.680224    16.200000     0.041742     0.041744     0.037476     0.046492     0.391000     0.048985     0.048988     0.037476     0.052520     0.252000     0.538462     0.538462     0.485143 
    1.000000     0.375721     0.600230     0.750432    326    772    984    659    250     58     10      0      0    224   3925     89   3059     1.983000     1.949314     2.052533     0.067856     0.026266     0.756336     0.743433     5.400000     0.013914     0.013915     0.007427     0.014440     0.153000     0.019168     0.019169     0.007427     0.021315     0.247000     0.527778     0.527778     0.352450 
    1.000000     0.375721     0.601501     0.751226    342    793    942    614    283     68     16      1      0    257   3925    136   3059     1.992000     2.222592     2.188754     0.077853     0.094377     0.722176     0.726406     6.100000     0.015718     0.015718     0.012924     0.018910     0.168000     0.021047     0.021048     0.012924     0.027538     0.264000     0.564103     0.564103     0.392404 
    1.000000     0.375721     0.600230     0.750432    338    733    996    662    257     65      7      1      0    252   3925    113   3059     1.998000     1.951484     2.073594     0.076338     0.036797     0.756065     0.740801     5.500000     0.014172     0.014172     0.008158     0.016023     0.162000     0.020296     0.020297     0.008158     0.023385     0.233000     0.497863     0.497863     0.358890 
    1.000000     0.375721     0.600230     0.750432    335    727   1032    631    253     68     10      2      1    261   3925    139   3059     2.000000     2.005673     2.115231     0.079065     0.057616     0.749291     0.735596     5.100000     0.013141     0.013142     0.009729     0.019019     0.134000     0.016788     0.016789     0.009729     0.024213     0.239000     0.510684     0.510684     0.371326 
    1.000000     0.375721     0.598384     0.749280    313    772    989    646    252     72      9      6      0    248   3925    120   3059     2.011000     1.948853     2.072104     0.075127     0.036052     0.756393     0.740987     5.900000     0.015202     0.015203     0.008105     0.019758     0.158000     0.019795     0.019796     0.008105     0.018994     0.261000     0.557692     0.557692     0.358438 
    1.000000     0.375721     0.698266     0.811634    604   1021    896    402    114     22      0      0      0   -258   3925   -271   3059     1.499000     1.515288     1.542154    -0.078156    -0.228923     0.810589     0.807231     1.900000     0.004896     0.004896     0.000053     0.004741     0.053000     0.006640     0.006640     0.000053     0.009096     0.295000     0.630342     0.630342     0.137963 
    1.000000     0.375721     0.701156     0.813438    602   1042    848    452     94     15      6      0      0   -251   3925   -261   3059     1.498000     1.212563     1.525490    -0.076035    -0.237255     0.848430     0.809314     1.700000     0.004380     0.004381     0.000034     0.003219     0.048000     0.006014     0.006014     0.000034     0.004084     0.286000     0.611111     0.611111     0.126553 
    1.000000     0.375721     0.700460     0.813004    582   1067    849    439    104     17      1      0      0   -282   3925   -268   3059     1.500000     1.315911     1.525172    -0.085426    -0.237414     0.835511     0.809354     1.800000     0.004638     0.004638     0.000033     0.003122     0.048000     0.006014     0.006014     0.000033     0.005749     0.281000     0.600427     0.600427     0.126327 
    1.000000     0.375721     0.699417     0.812352    617   1033    865    393    126     24      1      0      0   -239   3925   -247   3059     1.495000     1.716418     1.608215    -0.072400    -0.195892     0.785448     0.798973     1.700000     0.004380     0.004381     0.000200     0.004622     0.048000     0.006014     0.006014     0.000200     0.010268     0.287000     0.613248     0.613248     0.177432 
    1.000000     0.375721     0.701852     0.813872    606   1024    890    403    115     18      3      0      0   -249   3925   -257   3059     1.498000     1.609480     1.573392    -0.075430    -0.213304     0.798815     0.803326     1.800000     0.004638     0.004638     0.000107     0.003007     0.049000     0.006139     0.006139     0.000107     0.006406     0.294000     0.628205     0.628205     0.157591 
    1.000000     0.375721     0.800690     0.875575   1072   1175    630    143     37      1      1      0      0   -558   3925   -478   3059     0.988000     1.783437     1.084172    -0.169035    -0.457914     0.777070     0.864479     0.600000     0.001546     0.001546     0.000000    -0.003172     0.018000     0.002255     0.002255     0.000000    -0.001774     0.355000     0.758547     0.758547     0.000000 
    1.000000     0.375721     0.801279     0.875943   1031   1222    625    146     34      1      0      0      0   -578   3925   -501   3059     0.997000     1.629246     1.034077    -0.175094    -0.482961     0.796344     0.870740     0.600000     0.001546     0.001546     0.000000    -0.002510     0.017000     0.002130     0.002130     0.000000    -0.000190     0.354000     0.756410     0.756410     0.000000 
    1.000000     0.375721     0.799192     0.874640   1099   1116    641    166     34      3      0      0      0   -519   3925   -452   3059     0.996000     1.319606     1.065499    -0.157221    -0.467250     0.835049     0.866813     0.700000     0.001804     0.001804     0.000000     0.000177     0.020000     0.002506     0.002506     0.000000     0.002253     0.341000     0.728632     0.728632     0.000000 
    1.000000     0.375721     0.799419     0.874782   1056   1176    631    159     32      5      0      0      0   -549   3925   -488   3059     1.003000     1.143405     1.028792    -0.166309    -0.485604     0.857074     0.871401     0.600000     0.001546     0.001546     0.000000     0.002446     0.018000     0.002255     0.002255     0.000000     0.004227     0.346000     0.739316     0.739316     0.000000 
