# Supplementary material
Source: publisher figshare collection journal article supplement (https://frontiersin.figshare.com/ndownloader/files/13649807)
Supplement: Supplementary file 1 [file 13649807 › SupplementaryData-bcc-RVE12-CUT50.dat]

   z_x/z_bcc     zeta_ini         zeta     zeta_tot    N_0    N_1    N_2    N_3    N_4    N_5    N_6    N_7    N_8      g  N_J,t  g^(i) N_J,t^(i)     z_avg        z_avg        z_avg         g_V*         g_V*     zeta_tot     zeta_tot            E         E/E0     E/E0,bcc     E/E0,bcc     E/E0,bcc           sy       sy/sy0   sy/sy0,bcc   sy/sy0,bcc   sy/sy0,bcc           nu       nu/nu0   nu/nu0,bcc   nu/nu0,bcc
         [-]          [-]          [-]          [-]    [-]    [-]    [-]    [-]    [-]    [-]    [-]    [-]    [-]    [-]    [-]    [-]    [-]          [-]          [-]          [-]          [-]          [-]          [-]          [-]        [MPa]          [-]          [-]          [-]          [-]        [MPa]          [-]          [-]          [-]          [-]          [-]          [-]          [-]          [-]
         RVE          RVE          RVE          RVE    RVE    RVE    RVE    RVE    RVE    RVE    RVE    RVE    RVE    RVE    RVE    RVE    RVE          RVE         ANN3       ANN3gi          RVE       ANN3gi         ANN3       ANN3gi          RVE          RVE          RVE           MC      MC+ANN3          RVE          RVE          RVE           MC      MC+ANN3          RVE          RVE          RVE           MC
    1.000000     0.500940     0.000000     0.500940     14    108    331    691    830    636    347     85     17   3050   3925   2313   3059     3.974000     3.977371     3.939575     0.923936     0.969788     0.502829     0.507553    88.800000     0.228807     0.228819     0.228506     0.233577     1.689000     0.211601     0.211612     0.228506     0.224623     0.324000     0.692308     0.692308     0.725199 
    1.000000     0.500940     0.100741     0.551216     52    120    530    789    776    519    221     47      5   2458   3925   1839   3059     3.577000     3.592579     3.587455     0.744602     0.793727     0.550928     0.551568    62.300000     0.160526     0.160534     0.169657     0.173106     1.237000     0.154974     0.154981     0.169657     0.169261     0.290000     0.619658     0.619658     0.674889 
    1.000000     0.500940     0.100741     0.551216     70    110    513    786    792    519    216     46      7   2467   3925   1846   3059     3.573000     3.601829     3.601276     0.747328     0.800638     0.549771     0.549841    65.300000     0.168256     0.168264     0.171880     0.174879     1.281000     0.160486     0.160494     0.171880     0.172780     0.306000     0.653846     0.653846     0.676976 
    1.000000     0.500940     0.098716     0.550205     59    106    524    769    832    512    212     40      5   2466   3925   1829   3059     3.577000     3.621513     3.631547     0.747025     0.815773     0.547311     0.546057    64.600000     0.166452     0.166460     0.176777     0.177959     1.293000     0.161989     0.161998     0.176777     0.182574     0.294000     0.628205     0.628205     0.681515 
    1.000000     0.500940     0.099720     0.550706     55    115    507    811    787    515    221     42      6   2460   3925   1854   3059     3.581000     3.564720     3.570047     0.745208     0.785023     0.554410     0.553744    63.300000     0.163102     0.163110     0.166869     0.170008     1.241000     0.155475     0.155483     0.166869     0.168042     0.291000     0.621795     0.621795     0.672245 
    1.000000     0.500940     0.202052     0.601776    121    170    708    818    710    386    124     20      2   1886   3925   1388   3059     3.174000     3.275227     3.285914     0.571326     0.642957     0.590597     0.589261    41.600000     0.107189     0.107194     0.123426     0.124602     0.870000     0.108995     0.109001     0.123426     0.133904     0.261000     0.557692     0.557692     0.626774 
    1.000000     0.500940     0.204378     0.602937    120    195    671    834    710    385    123     21      0   1881   3925   1370   3059     3.167000     3.248302     3.250480     0.569811     0.625240     0.593962     0.593690    41.200000     0.106158     0.106164     0.118318     0.120072     0.849000     0.106364     0.106370     0.118318     0.128144     0.251000     0.536325     0.536325     0.620776 
    1.000000     0.500940     0.197416     0.599462     92    163    733    872    670    380    129     16      4   1887   3925   1358   3059     3.185000     3.157769     3.174912     0.571629     0.587456     0.605279     0.603136    43.400000     0.111827     0.111832     0.107684     0.111090     0.920000     0.115259     0.115265     0.107684     0.116138     0.257000     0.549145     0.549145     0.607723 
    1.000000     0.500940     0.300182     0.650749    170    302    865    815    578    256     60     13      0   1323   3925    931   3059     2.785000     2.905827     2.909700     0.400776     0.454850     0.636772     0.636287    26.100000     0.067251     0.067254     0.073542     0.076815     0.560000     0.070158     0.070161     0.073542     0.088110     0.259000     0.553419     0.553419     0.558832 
    1.000000     0.500940     0.300919     0.651116    173    299    834    880    567    231     62     11      2   1318   3925    931   3059     2.777000     2.762634     2.822573     0.399262     0.411287     0.654671     0.647178    22.900000     0.059005     0.059008     0.063545     0.069615     0.507000     0.063518     0.063521     0.063545     0.077192     0.217000     0.463675     0.463675     0.541608 
    1.000000     0.500931     0.303090     0.652194    193    301    834    833    586    237     60     15      0   1319   3925    925   3059     2.766000     2.882026     2.885622     0.399565     0.442811     0.639747     0.639297    23.800000     0.061324     0.061327     0.070714     0.075256     0.529000     0.066274     0.066277     0.070714     0.083675     0.239000     0.510684     0.510684     0.554134 
    1.000000     0.500931     0.402524     0.701818    285    427    982    779    427    121     34      4      0    792   3925    533   3059     2.378000     2.464430     2.545108     0.239921     0.272554     0.691946     0.681862    12.700000     0.032724     0.032725     0.036363     0.042229     0.329000     0.041218     0.041220     0.036363     0.051728     0.233000     0.497863     0.497863     0.482160 
    1.000000     0.500940     0.400489     0.700808    258    428   1033    761    417    125     30      7      0    776   3925    523   3059     2.386000     2.459850     2.536918     0.235074     0.268459     0.692519     0.682885    11.300000     0.029116     0.029118     0.035675     0.042820     0.296000     0.037083     0.037085     0.035675     0.049663     0.217000     0.463675     0.463675     0.480286 
    1.000000     0.500940     0.401510     0.701317    275    465    961    756    407    158     31      6      0    782   3925    545   3059     2.387000     2.435529     2.537051     0.236891     0.268526     0.695559     0.682869    11.800000     0.030405     0.030406     0.035686     0.043539     0.278000     0.034828     0.034830     0.035686     0.052659     0.221000     0.472222     0.472222     0.480316 
    1.000000     0.500940     0.403100     0.702111    279    437    972    791    426    116     34      4      0    785   3925    528   3059     2.377000     2.441874     2.530082     0.237800     0.265041     0.694766     0.683740    10.600000     0.027313     0.027314     0.035107     0.041188     0.306000     0.038336     0.038338     0.035107     0.049517     0.193000     0.412393     0.412393     0.478715 
    1.000000     0.500940     0.498920     0.749931    359    672   1053    638    268     60      9      0      0    277   3925    121   3059     2.000000     2.089804     2.129499     0.083912     0.064749     0.738774     0.733813     3.800000     0.009791     0.009792     0.010307     0.015358     0.102000     0.012779     0.012779     0.010307     0.025211     0.217000     0.463675     0.463675     0.375502 
    1.000000     0.500940     0.501381     0.751159    387    674   1040    608    263     75     11      1      0    293   3925    149   3059     1.987000     2.095644     2.159044     0.088758     0.079522     0.738044     0.730119     4.600000     0.011853     0.011853     0.011568     0.019575     0.127000     0.015911     0.015912     0.011568     0.029527     0.205000     0.438034     0.438034     0.384015 
    1.000000     0.500940     0.502101     0.751518    426    636   1010    655    252     68     12      0      0    312   3925    128   3059     1.975000     1.943174     2.085741     0.094514     0.042870     0.757103     0.739282     4.600000     0.011853     0.011853     0.008599     0.017472     0.124000     0.015535     0.015536     0.008599     0.024860     0.214000     0.457265     0.457265     0.362558 
    1.000000     0.500940     0.499925     0.750432    404    654   1053    615    243     78     11      1      0    291   3925    107   3059     1.975000     1.944070     2.070306     0.088153     0.035153     0.756991     0.741212     3.700000     0.009534     0.009534     0.008041     0.018501     0.106000     0.013280     0.013281     0.008041     0.026035     0.213000     0.455128     0.455128     0.357892 
    1.000000     0.500940     0.602122     0.801435    621    863    947    450    145     30      3      0      0    -87   3925   -164   3059     1.587000     1.715369     1.719815    -0.026355    -0.140092     0.785579     0.785023     1.700000     0.004380     0.004381     0.000821     0.006694     0.045000     0.005638     0.005638     0.000821     0.011685     0.245000     0.523504     0.523504     0.231718 
    1.000000     0.500940     0.598490     0.799622    614    833    990    446    139     31      5      1      0    -76   3925   -150   3059     1.602000     1.661747     1.720594    -0.023023    -0.139703     0.792282     0.784926     1.500000     0.003865     0.003865     0.000827     0.008791     0.036000     0.004510     0.004510     0.000827     0.010237     0.214000     0.457265     0.457265     0.232060 
    1.000000     0.500940     0.599361     0.800057    592    872   1011    427    124     30      3      0      0   -115   3925   -204   3059     1.582000     1.511586     1.625542    -0.034837    -0.187229     0.811052     0.796807     1.500000     0.003865     0.003865     0.000262     0.008374     0.037000     0.004635     0.004636     0.000262     0.011767     0.235000     0.502137     0.502137     0.186677 
    1.000000     0.500940     0.599511     0.800132    634    811    994    446    146     23      5      0      0    -64   3925   -151   3059     1.591000     1.822288     1.755487    -0.019388    -0.122257     0.772214     0.780564     1.700000     0.004380     0.004381     0.001150     0.003864     0.045000     0.005638     0.005638     0.001150     0.007908     0.232000     0.495726     0.495726     0.247000 
    1.000000     0.500940     0.599946     0.800349    565    899    995    431    143     23      3      0      0   -134   3925   -194   3059     1.598000     1.823968     1.705115    -0.040593    -0.147443     0.772004     0.786861     1.500000     0.003865     0.003865     0.000706     0.003179     0.036000     0.004510     0.004510     0.000706     0.008334     0.242000     0.517094     0.517094     0.225177 
    1.000000     0.500940     0.702278     0.851419    917   1038    804    236     57      5      2      0      0   -406   3925   -409   3059     1.183000     1.524991     1.249553    -0.122990    -0.375223     0.809376     0.843806     0.500000     0.001288     0.001288     0.000000    -0.000013     0.015000     0.001879     0.001879     0.000000     0.001855     0.271000     0.579060     0.579060     0.000000 
    1.000000     0.500940     0.697340     0.848955    906   1056    780    252     55     10      0      0      0   -409   3925   -391   3059     1.191000     1.175699     1.234165    -0.123898    -0.382918     0.853038     0.845729     0.500000     0.001288     0.001288     0.000000     0.003670     0.015000     0.001879     0.001879     0.000000     0.005759     0.243000     0.519231     0.519231     0.000000 
    1.000000     0.500940     0.697642     0.849105    920   1023    798    240     60     16      2      0      0   -381   3925   -360   3059     1.200000     1.259805     1.287617    -0.115416    -0.356191     0.842524     0.839048     0.600000     0.001546     0.001546     0.000000     0.008856     0.016000     0.002005     0.002005     0.000000     0.010315     0.273000     0.583333     0.583333     0.000000 
    1.000000     0.500940     0.698947     0.849757    897   1078    759    261     58      6      0      0      0   -422   3925   -407   3059     1.190000     1.360699     1.246356    -0.127836    -0.376822     0.829913     0.844206     0.500000     0.001288     0.001288     0.000000     0.000406     0.015000     0.001879     0.001879     0.000000     0.003042     0.281000     0.600427     0.600427     0.000000 
    1.000000     0.500940     0.701692     0.851126    902   1064    770    262     55      5      1      0      0   -419   3925   -383   3059     1.190000     1.345866     1.258923    -0.126928    -0.370538     0.831767     0.842635     0.500000     0.001288     0.001288     0.000000     0.000404     0.014000     0.001754     0.001754     0.000000     0.002228     0.280000     0.598291     0.598291     0.000000 
    1.000000     0.500940     0.799689     0.900033   1395   1048    496    111      8      1      0      0      0   -519   3925   -458   3059     0.788000     1.325287     0.836632    -0.157221    -0.581684     0.834339     0.895421     0.200000     0.000515     0.000515     0.000000    -0.002845     0.007000     0.000877     0.000877     0.000000    -0.002966     0.306000     0.653846     0.653846     0.000000 
    1.000000     0.500940     0.799973     0.900175   1385   1058    492    108     16      0      0      0      0   -522   3925   -437   3059     0.794000     1.447055     0.889794    -0.158129    -0.555103     0.819118     0.888776     0.200000     0.000515     0.000515     0.000000    -0.000582     0.007000     0.000877     0.000877     0.000000    -0.000369     0.311000     0.664530     0.664530     0.000000 
    1.000000     0.500940     0.798668     0.899523   1376   1037    541     93     10      2      0      0      0   -514   3925   -455   3059     0.800000     0.954938     0.813555    -0.155706    -0.593222     0.880633     0.898306     0.200000     0.000515     0.000515     0.000000     0.000221     0.007000     0.000877     0.000877     0.000000    -0.000281     0.291000     0.621795     0.621795     0.000000 
    1.000000     0.500940     0.797948     0.899164   1378   1037    534     94     16      0      0      0      0   -512   3925   -464   3059     0.801000     1.487902     0.850094    -0.155100    -0.574953     0.814012     0.893738     0.200000     0.000515     0.000515     0.000000    -0.000933     0.007000     0.000877     0.000877     0.000000    -0.000305     0.303000     0.647436     0.647436     0.000000 
    1.000000     0.500931     0.801851     0.901110   1416   1021    510     97     12      3      0      0      0   -520   3925   -436   3059     0.783000     0.814297     0.853695    -0.157524    -0.573152     0.898213     0.893288     0.200000     0.000515     0.000515     0.000000     0.001936     0.007000     0.000877     0.000877     0.000000     0.001314     0.300000     0.641026     0.641026     0.000000 
