# Supplementary material
Source: publisher figshare collection journal article supplement (https://frontiersin.figshare.com/ndownloader/files/13649807)
Supplement: Supplementary file 1 [file 13649807 › SupplementaryData-bcc-RVE12.dat]

   z_x/z_bcc     zeta_ini         zeta     zeta_tot    N_0    N_1    N_2    N_3    N_4    N_5    N_6    N_7    N_8      g  N_J,t  g^(i) N_J,t^(i)     z_avg        z_avg        z_avg         g_V*         g_V*     zeta_tot     zeta_tot            E         E/E0     E/E0,bcc     E/E0,bcc     E/E0,bcc           sy       sy/sy0   sy/sy0,bcc   sy/sy0,bcc   sy/sy0,bcc           nu       nu/nu0   nu/nu0,bcc   nu/nu0,bcc
         [-]          [-]          [-]          [-]    [-]    [-]    [-]    [-]    [-]    [-]    [-]    [-]    [-]    [-]    [-]    [-]    [-]          [-]          [-]          [-]          [-]          [-]          [-]          [-]        [MPa]          [-]          [-]          [-]          [-]        [MPa]          [-]          [-]          [-]          [-]          [-]          [-]          [-]          [-]
         RVE          RVE          RVE          RVE    RVE    RVE    RVE    RVE    RVE    RVE    RVE    RVE    RVE    RVE    RVE    RVE    RVE          RVE         ANN3       ANN3gi          RVE       ANN3gi         ANN3       ANN3gi          RVE          RVE          RVE           MC      MC+ANN3          RVE          RVE          RVE           MC      MC+ANN3          RVE          RVE          RVE           MC
    1.000000     0.000000     0.000000     0.000000      0      0      0      0      0      0      0      0   3059   9900   3925   7722   3059     8.000000     8.025572     7.992901     2.999006     2.996451    -0.003196     0.000887   388.100000     1.000000     1.000050     0.998675     0.998488     7.982000     1.000000     1.000050     0.998675     0.997552     0.468000     1.000000     1.000000     0.999996 
    1.000000     0.000000     0.099825     0.099825      0      0      0      0     12    102    453   1163   1329   8532   3925   6668   3059     7.208000     7.218324     7.209768     2.584598     2.604884     0.097710     0.098779   331.300000     0.853646     0.853689     0.847046     0.855718     6.670000     0.835630     0.835672     0.847046     0.835802     0.461000     0.985043     0.985043     0.985910 
    1.000000    -0.000008     0.100117     0.100109      0      0      0      4     15    108    453   1160   1319   8532   3925   6622   3059     7.193000     7.189914     7.193085     2.584598     2.596543     0.101261     0.100864   331.100000     0.853131     0.853174     0.843818     0.852460     6.650000     0.833125     0.833166     0.843818     0.832678     0.461000     0.985043     0.985043     0.985383 
    1.000000     0.000000     0.100043     0.100043      0      0      0      2     10     97    463   1202   1285   8532   3925   6622   3059     7.193000     7.208918     7.173770     2.584598     2.586885     0.098885     0.103279   331.500000     0.854161     0.854204     0.840080     0.849528     6.662000     0.834628     0.834670     0.840080     0.827708     0.461000     0.985043     0.985043     0.984761 
    1.000000     0.000000     0.100185     0.100185      0      0      0      1     11    100    459   1181   1307   8531   3925   6643   3059     7.200000     7.211461     7.191437     2.584295     2.595718     0.098567     0.101070   331.400000     0.853904     0.853947     0.843499     0.852530     6.660000     0.834377     0.834419     0.843499     0.831757     0.461000     0.985043     0.985043     0.985330 
    1.000000    -0.000008     0.099541     0.099533      0      0      0      1     14    105    437   1203   1299   8531   3925   6638   3059     7.198000     7.209878     7.178044     2.584295     2.589022     0.098765     0.102744   331.500000     0.854161     0.854204     0.840907     0.850169     6.655000     0.833751     0.833793     0.840907     0.828788     0.460000     0.982906     0.982906     0.984900 
    1.000000     0.000000     0.200302     0.200302      0      0      2     27    144    450    865   1086    485   7163   3925   5572   3059     6.402000     6.388810     6.433635     2.169887     2.216817     0.201399     0.195796   273.800000     0.705488     0.705524     0.696977     0.712615     5.430000     0.680281     0.680315     0.696977     0.684989     0.448000     0.957265     0.957265     0.952752 
    1.000000    -0.000008     0.199800     0.199793      0      0      4     29    136    458    925    985    522   7163   3925   5539   3059     6.391000     6.405877     6.365689     2.169887     2.182845     0.199265     0.204289   273.400000     0.704458     0.704493     0.683859     0.696761     5.419000     0.678903     0.678937     0.683859     0.672344     0.448000     0.957265     0.957265     0.949034 
    1.000000     0.000000     0.200085     0.200085      0      1      1     26    145    430    902   1050    504   7168   3925   5595   3059     6.409000     6.410204     6.455118     2.171402     2.227559     0.198725     0.193110   273.600000     0.704973     0.705008     0.701125     0.716298     5.424000     0.679529     0.679563     0.701125     0.689645     0.450000     0.961538     0.961538     0.953900 
    1.000000    -0.000008     0.199365     0.199358      0      0      7     30    148    439    884    991    560   7164   3925   5601   3059     6.411000     6.432615     6.431001     2.170190     2.215500     0.195923     0.196125   273.100000     0.703685     0.703720     0.696468     0.709492     5.410000     0.677775     0.677809     0.696468     0.685383     0.448000     0.957265     0.957265     0.952610 
    1.000000    -0.000008     0.199582     0.199576      0      0      7     25    150    448    863   1049    517   7168   3925   5576   3059     6.403000     6.411979     6.427212     2.171402     2.213606     0.198503     0.196599   273.200000     0.703942     0.703978     0.695737     0.710469     5.422000     0.679278     0.679313     0.695737     0.684202     0.449000     0.959402     0.959402     0.952406 
    1.000000     0.000000     0.299911     0.299911      0      3     18    138    416    792    914    610    168   5804   3925   4537   3059     5.615000     5.586194     5.616198     1.758205     1.808099     0.301726     0.297975   214.000000     0.551404     0.551432     0.539597     0.554760     4.212000     0.527687     0.527714     0.539597     0.527799     0.427000     0.912393     0.912393     0.899400 
    1.000000    -0.000008     0.300493     0.300487      0      5     34    134    401    802    891    618    174   5800   3925   4515   3059     5.607000     5.589495     5.621697     1.756994     1.810849     0.301313     0.297288   215.100000     0.554239     0.554266     0.540651     0.555433     4.223000     0.529065     0.529092     0.540651     0.528493     0.430000     0.918803     0.918803     0.899822 
    1.000000     0.000000     0.299769     0.299769      0      6     40    114    388    812    923    621    155   5801   3925   4525   3059     5.611000     5.603782     5.642837     1.757297     1.821419     0.299527     0.294645   214.000000     0.551404     0.551432     0.544704     0.559890     4.193000     0.525307     0.525333     0.544704     0.532482     0.429000     0.916667     0.916667     0.901438 
    1.000000     0.000000     0.300637     0.300637      0      3     41    123    436    775    912    586    183   5798   3925   4473   3059     5.594000     5.608674     5.608960     1.756388     1.804480     0.298916     0.298880   213.900000     0.551147     0.551174     0.538209     0.553894     4.197000     0.525808     0.525835     0.538209     0.527298     0.429000     0.916667     0.916667     0.898842 
    1.000000     0.000000     0.299693     0.299693      0      4     24    149    420    801    891    593    177   5798   3925   4459   3059     5.589000     5.559026     5.575877     1.756388     1.787939     0.305122     0.303015   214.700000     0.553208     0.553236     0.531870     0.546460     4.229000     0.529817     0.529844     0.531870     0.519941     0.427000     0.912393     0.912393     0.896274 
    1.000000     0.000000     0.399886     0.399886      2     21    123    378    706    888    622    270     49   4448   3925   3430   3059     4.799000     4.796290     4.777281     1.347432     1.388640     0.400464     0.402840   155.900000     0.401701     0.401721     0.380344     0.392316     3.064000     0.383864     0.383883     0.380344     0.368499     0.396000     0.846154     0.846154     0.824203 
    1.000000     0.000000     0.400246     0.400246      2     23    122    377    736    863    620    277     39   4441   3925   3368   3059     4.782000     4.786508     4.739854     1.345312     1.369927     0.401686     0.407518   152.300000     0.392425     0.392444     0.373348     0.385719     2.944000     0.368830     0.368848     0.373348     0.362507     0.391000     0.835470     0.835470     0.820325 
    1.000000     0.000000     0.399886     0.399886      4     20    123    375    729    852    647    261     48   4451   3925   3407   3059     4.792000     4.802264     4.764385     1.348341     1.382192     0.399717     0.404452   156.300000     0.402731     0.402752     0.377932     0.390108     3.058000     0.383112     0.383131     0.377932     0.367748     0.399000     0.852564     0.852564     0.822872 
    1.000000    -0.000008     0.399958     0.399953      0     27    122    382    705    861    647    251     64   4449   3925   3435   3059     4.803000     4.808216     4.779877     1.347735     1.389938     0.398973     0.402515   154.600000     0.398351     0.398371     0.380830     0.392616     3.041000     0.380982     0.381001     0.380830     0.370149     0.399000     0.852564     0.852564     0.824470 
    1.000000     0.000000     0.400104     0.400104      4     26    127    399    687    842    647    276     51   4444   3925   3404   3059     4.791000     4.793840     4.751170     1.346221     1.375585     0.400770     0.406104   153.900000     0.396547     0.396567     0.375462     0.387677     3.014000     0.377600     0.377619     0.375462     0.363841     0.398000     0.850427     0.850427     0.821503 
    1.000000    -0.000008     0.499783     0.499779     14    114    293    689    848    659    341     89     12   3105   3925   2381   3059     3.994000     3.984771     3.977523     0.940597     0.988762     0.501904     0.502810    97.200000     0.250451     0.250464     0.235085     0.239546     1.943000     0.243423     0.243435     0.235085     0.231005     0.349000     0.745726     0.745726     0.730283 
    1.000000     0.000000     0.499202     0.499202      6     91    325    698    826    692    315     95     11   3108   3925   2394   3059     4.002000     3.968785     3.975957     0.941506     0.987979     0.503902     0.503005    94.900000     0.244525     0.244537     0.234813     0.238670     1.884000     0.236031     0.236043     0.234813     0.227112     0.344000     0.735043     0.735043     0.730075 
    1.000000     0.000000     0.499712     0.499712     14     91    311    707    831    670    320     95     20   3124   3925   2406   3059     4.006000     3.966025     3.965275     0.946353     0.982637     0.504247     0.504341    98.100000     0.252770     0.252783     0.232957     0.237907     1.968000     0.246555     0.246567     0.232957     0.226107     0.356000     0.760684     0.760684     0.728649 
    1.000000     0.000000     0.499495     0.499495     14     89    319    673    862    665    319    102     16   3130   3925   2422   3059     4.013000     4.009948     4.018342     0.948171     1.009171     0.498757     0.497707    96.200000     0.247874     0.247887     0.242204     0.247433     1.955000     0.244926     0.244938     0.242204     0.236829     0.355000     0.758547     0.758547     0.735682 
    1.000000     0.000000     0.499929     0.499929     11     88    340    695    810    678    326     93     18   3122   3925   2382   3059     3.999000     3.980784     3.971962     0.945747     0.985981     0.502402     0.503505    97.200000     0.250451     0.250464     0.234118     0.238566     1.924000     0.241042     0.241054     0.234118     0.226721     0.357000     0.762821     0.762821     0.729542 
    1.000000    -0.000008     0.599825     0.599821     57    283    645    806    705    411    129     22      1   1844   3925   1398   3059     3.204000     3.308209     3.308025     0.558603     0.654013     0.586474     0.586497    48.900000     0.125998     0.126005     0.126652     0.127458     1.053000     0.131922     0.131928     0.126652     0.135619     0.311000     0.664530     0.664530     0.630478 
    1.000000     0.000000     0.600189     0.600189     48    276    641    844    716    375    139     18      2   1823   3925   1395   3059     3.205000     3.257057     3.254074     0.552241     0.627037     0.592868     0.593241    44.400000     0.114404     0.114409     0.118832     0.121326     0.968000     0.121273     0.121279     0.118832     0.128978     0.289000     0.617521     0.617521     0.621388 
    1.000000    -0.000008     0.600042     0.600038     50    270    651    832    733    367    129     25      2   1839   3925   1386   3059     3.204000     3.281606     3.265645     0.557088     0.632823     0.589799     0.591794    46.400000     0.119557     0.119563     0.120495     0.123735     0.994000     0.124530     0.124536     0.120495     0.128929     0.298000     0.636752     0.636752     0.623353 
    1.000000     0.000000     0.599896     0.599896     49    276    646    824    719    400    122     22      1   1839   3925   1418   3059     3.207000     3.281457     3.299759     0.557088     0.649880     0.589818     0.587530    47.600000     0.122649     0.122655     0.125443     0.126358     1.035000     0.129667     0.129673     0.125443     0.135384     0.301000     0.643162     0.643162     0.629097 
    1.000000     0.000000     0.599972     0.599972     47    280    658    834    698    380    136     22      4   1842   3925   1378   3059     3.201000     3.261040     3.245875     0.557997     0.622938     0.592370     0.594266    45.500000     0.117238     0.117244     0.117659     0.121234     0.995000     0.124655     0.124662     0.117659     0.124949     0.302000     0.645299     0.645299     0.619991 
    1.000000     0.000000     0.699872     0.699872    216    583    902    755    424    136     37      6      0    688   3925    473   3059     2.384000     2.507996     2.508674     0.208416     0.254337     0.686500     0.686416    16.000000     0.041226     0.041229     0.033357     0.040476     0.439000     0.054999     0.055002     0.033357     0.048222     0.277000     0.591880     0.591880     0.473762 
    1.000000    -0.000008     0.700376     0.700373    191    597    889    757    443    153     27      2      0    698   3925    527   3059     2.406000     2.537956     2.571904     0.211445     0.285952     0.682756     0.678512    15.900000     0.040969     0.040971     0.038659     0.041114     0.418000     0.052368     0.052370     0.038659     0.061561     0.285000     0.608974     0.608974     0.488241 
    1.000000     0.000000     0.700307     0.700307    166    614    890    785    422    143     36      2      1    669   3925    510   3059     2.416000     2.439579     2.506035     0.202660     0.253017     0.695053     0.686746    16.200000     0.041742     0.041744     0.033145     0.039680     0.445000     0.055750     0.055753     0.033145     0.052057     0.287000     0.613248     0.613248     0.473147 
    1.000000     0.000000     0.700231     0.700231    176    601    942    733    431    145     29      2      0    663   3925    465   3059     2.393000     2.550468     2.538593     0.200843     0.269296     0.681191     0.682676    15.400000     0.039680     0.039682     0.035815     0.038528     0.385000     0.048234     0.048236     0.035815     0.057838     0.270000     0.576923     0.576923     0.480670 
    1.000000     0.000000     0.700089     0.700089    161    622    937    726    443    134     32      3      1    667   3925    475   3059     2.398000     2.611053     2.573608     0.202054     0.286804     0.673618     0.678299    16.300000     0.041999     0.042002     0.038808     0.041132     0.433000     0.054247     0.054250     0.038808     0.058108     0.293000     0.626068     0.626068     0.488625 
    1.000000     0.000000     0.799698     0.799698    513   1023    906    448    136     31      1      1      0   -234   3925   -227   3059     1.599000     1.583743     1.627390    -0.070886    -0.186305     0.802032     0.796576     4.400000     0.011337     0.011338     0.000269     0.007935     0.133000     0.016662     0.016663     0.000269     0.010516     0.349000     0.745726     0.745726     0.187642 
    1.000000    -0.000008     0.800200     0.800199    511   1043    870    461    141     30      2      1      0   -237   3925   -213   3059     1.602000     1.622352     1.653703    -0.071794    -0.173148     0.797206     0.793287     4.400000     0.011337     0.011338     0.000387     0.007267     0.133000     0.016662     0.016663     0.000387     0.009680     0.344000     0.735043     0.735043     0.200975 
    1.000000    -0.000008     0.800200     0.800199    532    993    894    477    121     39      3      0      0   -207   3925   -196   3059     1.605000     1.211781     1.601538    -0.062706    -0.199231     0.848527     0.799808     4.200000     0.010822     0.010822     0.000179     0.011462     0.124000     0.015535     0.015536     0.000179     0.012762     0.338000     0.722222     0.722222     0.173766 
    1.000000    -0.000008     0.800418     0.800416    474   1091    887    437    144     25      1      0      0   -283   3925   -242   3059     1.596000     1.780822     1.651737    -0.085729    -0.174131     0.777397     0.793533     4.100000     0.010564     0.010565     0.000377     0.003403     0.125000     0.015660     0.015661     0.000377     0.009496     0.339000     0.724359     0.724359     0.200004 
    1.000000    -0.000008     0.799766     0.799764    523   1013    908    440    136     36      2      1      0   -233   3925   -221   3059     1.599000     1.577076     1.632404    -0.070583    -0.183798     0.802865     0.795949     4.000000     0.010307     0.010307     0.000290     0.010046     0.119000     0.014909     0.014909     0.000290     0.012569     0.341000     0.728632     0.728632     0.190239 
