# Supplementary material
Source: publisher figshare collection journal article supplement (https://frontiersin.figshare.com/ndownloader/files/13649807)
Supplement: Supplementary file 1 [file 13649807 › SupplementaryData-cub-RVE12-CUT16.dat]

   z_x/z_bcc     zeta_ini         zeta     zeta_tot    N_0    N_1    N_2    N_3    N_4    N_5    N_6    N_7    N_8      g  N_J,t  g^(i) N_J,t^(i)     z_avg        z_avg        z_avg         g_V*         g_V*     zeta_tot     zeta_tot            E         E/E0     E/E0,bcc     E/E0,bcc     E/E0,bcc           sy       sy/sy0   sy/sy0,bcc   sy/sy0,bcc   sy/sy0,bcc           nu       nu/nu0   nu/nu0,bcc   nu/nu0,bcc
         [-]          [-]          [-]          [-]    [-]    [-]    [-]    [-]    [-]    [-]    [-]    [-]    [-]    [-]    [-]    [-]    [-]          [-]          [-]          [-]          [-]          [-]          [-]          [-]        [MPa]          [-]          [-]          [-]          [-]        [MPa]          [-]          [-]          [-]          [-]          [-]          [-]          [-]          [-]
         RVE          RVE          RVE          RVE    RVE    RVE    RVE    RVE    RVE    RVE    RVE    RVE    RVE    RVE    RVE    RVE    RVE          RVE         ANN3       ANN3gi          RVE       ANN3gi         ANN3       ANN3gi          RVE          RVE          RVE           MC      MC+ANN3          RVE          RVE          RVE           MC      MC+ANN3          RVE          RVE          RVE           MC
    0.750000     0.171289     0.000000     0.378466      0      1     12     99    343    684    537      0      0   1930   1726   1930   1676     4.974000     4.953525     4.936472     1.276976     1.468236     0.380809     0.382941   350.600000     0.668191     0.409834     0.410238     0.395832     5.050000     0.778840     0.477701     0.410238     0.449951     0.361000     0.911616     0.844888     0.840174 
    0.750000     0.171308     0.099413     0.440268      1      2     61    228    515    574    295      0      0   1571   1726   1571   1676     4.480000     4.503083     4.512258     1.039445     1.256129     0.437115     0.435968   267.000000     0.508862     0.312110     0.331126     0.316191     4.061000     0.626311     0.384147     0.331126     0.374190     0.330000     0.833333     0.772336     0.795707 
    0.750000     0.171289     0.098619     0.439761      0     11     50    214    525    596    280      0      0   1575   1726   1575   1676     4.483000     4.528017     4.549078     1.042092     1.274539     0.433998     0.431365   268.300000     0.511340     0.313630     0.337916     0.322524     4.170000     0.643122     0.394458     0.337916     0.383838     0.335000     0.845960     0.784038     0.799813 
    0.750000     0.171289     0.200009     0.502779      4     16    152    387    534    450    133      0      0   1208   1726   1208   1676     3.977000     3.894614     3.951568     0.799268     0.975784     0.513173     0.506054   190.100000     0.362302     0.222218     0.230581     0.215054     3.109000     0.479488     0.294093     0.230581     0.266341     0.305000     0.770202     0.713825     0.726813 
    0.750000     0.171289     0.199613     0.502533      8     29    146    349    556    466    122      0      0   1202   1726   1202   1676     3.970000     3.979675     4.058146     0.795298     1.029073     0.502541     0.492732   186.100000     0.354679     0.217542     0.249187     0.231629     2.994000     0.461752     0.283215     0.249187     0.292287     0.299000     0.755051     0.699783     0.740879 
    0.750000     0.171308     0.199967     0.502764      3     24    151    366    550    448    134      0      0   1196   1726   1196   1676     3.979000     3.938200     3.998423     0.791328     0.999211     0.507725     0.500197   184.000000     0.350677     0.215087     0.238725     0.222464     2.873000     0.443091     0.271769     0.238725     0.278046     0.299000     0.755051     0.699783     0.733056 
    0.750000     0.171289     0.199637     0.502547      4     29    129    382    565    441    126      0      0   1192   1726   1192   1676     3.970000     3.888334     3.960504     0.788681     0.980252     0.513958     0.504937   189.700000     0.361540     0.221750     0.232130     0.215438     2.998000     0.462369     0.283593     0.232130     0.271977     0.296000     0.747475     0.692762     0.728011 
    0.750000     0.171289     0.300072     0.564971     15     57    272    510    493    251     78      0      0    861   1726    861   1676     3.476000     3.322262     3.311703     0.569677     0.655851     0.584717     0.586037   120.500000     0.229655     0.140859     0.127192     0.117305     2.024000     0.312153     0.191459     0.127192     0.155213     0.252000     0.636364     0.589783     0.631091 
    0.750000     0.171289     0.300398     0.565174     17     59    270    477    524    269     60      0      0    867   1726    867   1676     3.479000     3.391874     3.426729     0.573647     0.713365     0.576016     0.571659   123.800000     0.235944     0.144716     0.144440     0.126614     2.136000     0.329426     0.202053     0.144440     0.180692     0.261000     0.659091     0.610847     0.649873 
    0.750000     0.171289     0.300119     0.565000      9     68    293    463    496    268     79      0      0    866   1726    866   1676     3.485000     3.428514     3.433661     0.572985     0.716831     0.571436     0.570792   118.900000     0.226606     0.138988     0.145502     0.132235     2.074000     0.319864     0.196188     0.145502     0.176937     0.264000     0.666667     0.617868     0.650980 
    0.750000     0.171308     0.299357     0.564537     12     73    258    492    498    290     53      0      0    844   1726    844   1676     3.476000     3.346770     3.363298     0.558429     0.681649     0.581654     0.579588   114.300000     0.217839     0.133611     0.134839     0.118631     2.033000     0.313541     0.192310     0.134839     0.169613     0.263000     0.664141     0.615528     0.639610 
    0.750000     0.171308     0.301570     0.565912     16     76    241    497    508    273     65      0      0    868   1726    868   1676     3.482000     3.355302     3.369289     0.574308     0.684644     0.580587     0.578839   117.100000     0.223175     0.136884     0.135736     0.121242     1.952000     0.301049     0.184648     0.135736     0.168622     0.261000     0.659091     0.610847     0.640589 
    0.750000     0.171289     0.402184     0.628437     36    154    396    523    382    155     30      0      0    524   1726    524   1676     2.982000     2.889779     2.841512     0.346702     0.420756     0.638778     0.644811    59.400000     0.113208     0.069436     0.065662     0.060179     1.219000     0.188001     0.115310     0.065662     0.093945     0.225000     0.568182     0.526592     0.545405 
    0.750000     0.171289     0.397411     0.625470     26    154    401    531    384    152     28      0      0    524   1726    524   1676     2.991000     2.867352     2.828272     0.346702     0.414136     0.641581     0.646466    62.700000     0.119497     0.073293     0.064179     0.058667     1.258000     0.194016     0.118999     0.064179     0.092746     0.231000     0.583333     0.540635     0.542754 
    0.750000     0.171289     0.397969     0.625818     34    137    409    545    355    172     24      0      0    527   1726    527   1676     2.992000     2.742740     2.764126     0.348687     0.382063     0.657157     0.654484    62.600000     0.119306     0.073176     0.057213     0.054686     1.170000     0.180444     0.110675     0.057213     0.084122     0.230000     0.580808     0.538294     0.529693 
    0.750000     0.171289     0.498242     0.688140     70    284    519    447    288     61      7      0      0    188   1726    188   1676     2.483000     2.623815     2.479592     0.124389     0.239796     0.672023     0.690051    25.800000     0.049171     0.030159     0.031057     0.025180     0.617000     0.095157     0.058365     0.031057     0.051794     0.217000     0.547980     0.507869     0.466946 
    0.750000     0.171289     0.503575     0.691455     68    293    499    482    260     62     12      0      0    195   1726    195   1676     2.482000     2.412987     2.367771     0.129021     0.183886     0.698377     0.704029    24.900000     0.047456     0.029107     0.023034     0.024124     0.605000     0.093307     0.057229     0.023034     0.041823     0.172000     0.434343     0.402551     0.439748 
    0.750000     0.171289     0.601681     0.752432    151    431    570    377    124     20      3      0      0   -103   1726   -103   1676     1.979000     1.813677     1.791475    -0.068149    -0.104263     0.773290     0.776066     7.300000     0.013913     0.008533     0.001559     0.004220     0.200000     0.030845     0.018919     0.001559     0.009050     0.228000     0.575758     0.533614     0.261667 
    0.750000     0.171289     0.599935     0.751346    145    434    582    354    129     29      3      0      0    -96   1726    -96   1676     1.992000     1.881724     1.816684    -0.063518    -0.091658     0.764785     0.772915     7.200000     0.013722     0.008416     0.001896     0.008274     0.186000     0.028686     0.017595     0.001896     0.015514     0.235000     0.593434     0.549997     0.271548 
    0.750000     0.171289     0.598701     0.750579    141    468    556    330    138     38      5      0      0    -72   1726    -72   1676     1.994000     2.046788     1.904836    -0.047638    -0.047582     0.744152     0.761896     7.600000     0.014484     0.008884     0.003429     0.010896     0.216000     0.033313     0.020432     0.003429     0.021925     0.254000     0.641414     0.594464     0.303957 
    0.750000     0.171289     0.596558     0.749247    131    460    548    368    147     20      2      0      0    -72   1726    -72   1676     2.005000     2.102947     1.919786    -0.047638    -0.040107     0.737132     0.760027     7.000000     0.013341     0.008183     0.003748     0.001978     0.179000     0.027606     0.016932     0.003748     0.009997     0.229000     0.578283     0.535954     0.309165 
    0.750000     0.171289     0.599143     0.750854    145    462    546    359    134     29      1      0      0   -105   1726   -105   1676     1.980000     1.909214     1.815621    -0.069473    -0.092189     0.761348     0.773047     7.200000     0.013722     0.008416     0.001881     0.006925     0.200000     0.030845     0.018919     0.001881     0.015883     0.237000     0.598485     0.554677     0.271138 
    0.750000     0.171289     0.700300     0.813727    312    587    507    200     59     10      1      0      0   -284   1726   -284   1676     1.487000     1.629491     1.374631    -0.187907    -0.312685     0.796314     0.828171     2.600000     0.004955     0.003039     0.000000     0.003473     0.073000     0.011258     0.006905     0.000000     0.007603     0.271000     0.684343     0.634251     0.000000 
    0.750000     0.171308     0.698361     0.812525    281    611    511    220     47      6      0      0      0   -292   1726   -292   1676     1.498000     1.261844     1.294311    -0.193200    -0.352844     0.842269     0.838211     2.800000     0.005336     0.003273     0.000000     0.001414     0.075000     0.011567     0.007095     0.000000     0.003740     0.283000     0.714646     0.662336     0.000000 
    0.750000     0.171289     0.697576     0.812033    312    598    463    236     57     10      0      0      0   -280   1726   -280   1676     1.498000     1.311171     1.351232    -0.185261    -0.324384     0.836104     0.831096     2.700000     0.005146     0.003156     0.000000     0.003582     0.078000     0.012030     0.007378     0.000000     0.006499     0.276000     0.696970     0.645953     0.000000 
