# Supplementary material
Source: publisher figshare collection journal article supplement (https://frontiersin.figshare.com/ndownloader/files/13649807)
Supplement: Supplementary file 1 [file 13649807 › SupplementaryData-cub-RVE12-CUT33.dat]

   z_x/z_bcc     zeta_ini         zeta     zeta_tot    N_0    N_1    N_2    N_3    N_4    N_5    N_6    N_7    N_8      g  N_J,t  g^(i) N_J,t^(i)     z_avg        z_avg        z_avg         g_V*         g_V*     zeta_tot     zeta_tot            E         E/E0     E/E0,bcc     E/E0,bcc     E/E0,bcc           sy       sy/sy0   sy/sy0,bcc   sy/sy0,bcc   sy/sy0,bcc           nu       nu/nu0   nu/nu0,bcc   nu/nu0,bcc
         [-]          [-]          [-]          [-]    [-]    [-]    [-]    [-]    [-]    [-]    [-]    [-]    [-]    [-]    [-]    [-]    [-]          [-]          [-]          [-]          [-]          [-]          [-]          [-]        [MPa]          [-]          [-]          [-]          [-]        [MPa]          [-]          [-]          [-]          [-]          [-]          [-]          [-]          [-]
         RVE          RVE          RVE          RVE    RVE    RVE    RVE    RVE    RVE    RVE    RVE    RVE    RVE    RVE    RVE    RVE    RVE          RVE         ANN3       ANN3gi          RVE       ANN3gi         ANN3       ANN3gi          RVE          RVE          RVE           MC      MC+ANN3          RVE          RVE          RVE           MC      MC+ANN3          RVE          RVE          RVE           MC
    0.750000     0.342847     0.000000     0.507135      7     27    150    406    509    416    161      0      0   1194   1726   1194   1676     3.954000     3.849775     3.865194     0.790005     0.932597     0.518778     0.516851   187.400000     0.357156     0.219061     0.215730     0.203318     2.875000     0.443399     0.271958     0.215730     0.244607     0.278000     0.702020     0.650634     0.715052 
    0.750000     0.342847     0.097378     0.555129     24     36    265    485    474    303     89      0      0    926   1726    926   1676     3.560000     3.420003     3.427567     0.612684     0.713784     0.572500     0.571554   132.500000     0.252525     0.154886     0.144568     0.134568     2.188000     0.337446     0.206972     0.144568     0.171238     0.259000     0.654040     0.606166     0.650007 
    0.750000     0.342847     0.103603     0.558198     29     43    245    469    520    291     79      0      0    922   1726    922   1676     3.550000     3.459504     3.490210     0.610037     0.745105     0.567562     0.563724   131.400000     0.250429     0.153600     0.154254     0.139284     2.109000     0.325262     0.199499     0.154254     0.187698     0.253000     0.638889     0.592124     0.659918 
    0.750000     0.342847     0.098670     0.555766     21     37    263    479    484    310     82      0      0    926   1726    926   1676     3.567000     3.435480     3.453436     0.612684     0.726718     0.570565     0.568320   129.600000     0.246998     0.151496     0.148544     0.136584     2.102000     0.324183     0.198837     0.148544     0.177711     0.248000     0.626263     0.580422     0.654126 
    0.750000     0.342847     0.097671     0.555274     19     42    260    477    492    298     88      0      0    930   1726    930   1676     3.567000     3.445495     3.460242     0.615330     0.730121     0.569313     0.567470   129.500000     0.246808     0.151379     0.149596     0.138163     2.133000     0.328964     0.201769     0.149596     0.178703     0.233000     0.588384     0.545316     0.655203 
    0.750000     0.342847     0.196958     0.604209     38     85    384    505    407    222     35      0      0    658   1726    658   1676     3.172000     3.075215     3.059018     0.435363     0.529509     0.615598     0.617623    77.000000     0.146751     0.090009     0.092121     0.082202     1.290000     0.198951     0.122026     0.092121     0.121978     0.200000     0.505051     0.468082     0.586975 
    0.750000     0.342828     0.196130     0.603789     43     77    378    507    447    179     45      0      0    654   1726    654   1676     3.166000     3.135059     3.081132     0.432716     0.540566     0.608118     0.614858    80.400000     0.153230     0.093984     0.095017     0.084262     0.000000     0.000000     0.000000     0.095017     0.124721     0.216000     0.545455     0.505529     0.591005 
    0.750000     0.342847     0.199953     0.605685     51     70    366    541    404    206     38      0      0    665   1726    665   1676     3.162000     2.973594     2.978168     0.439994     0.489084     0.628301     0.627729    85.900000     0.163713     0.100413     0.081844     0.075834     1.443000     0.222548     0.136499     0.081844     0.109209     0.231000     0.583333     0.540635     0.571944 
    0.750000     0.342847     0.201598     0.606496     55     76    363    524    423    188     47      0      0    670   1726    670   1676     3.155000     3.062172     3.035989     0.443302     0.517995     0.617228     0.620501    86.400000     0.164666     0.100997     0.089143     0.082295     1.452000     0.223936     0.137351     0.089143     0.116495     0.208000     0.525253     0.486805     0.582742 
    0.750000     0.342847     0.196547     0.604006     41     83    370    534    405    194     49      0      0    660   1726    660   1676     3.168000     3.007905     2.985725     0.436686     0.492862     0.624012     0.626784     0.000000     0.000000     0.000000     0.082783     0.078662     0.000000     0.000000     0.000000     0.082783     0.107979     0.000000     0.000000     0.000000     0.573369 
    0.750000     0.342847     0.299562     0.654779     66    141    518    521    275    132     23      0      0    392   1726    392   1676     2.767000     2.412062     2.533961     0.259365     0.266981     0.698492     0.683255    48.000000     0.091481     0.056110     0.035429     0.040977     0.000000     0.000000     0.000000     0.035429     0.057352     0.197000     0.497475     0.461061     0.479607 
    0.750000     0.342847     0.299533     0.654765     67    154    475    519    329    115     17      0      0    409   1726    409   1676     2.777000     2.644785     2.651513     0.270613     0.325756     0.669402     0.668561    43.800000     0.083476     0.051200     0.045908     0.043799     0.000000     0.000000     0.000000     0.045908     0.073338     0.226000     0.570707     0.528933     0.505854 
    0.750000     0.342847     0.299592     0.654794     69    144    505    489    330    121     18      0      0    413   1726    413   1676     2.777000     2.743038     2.714855     0.273260     0.357428     0.657120     0.660643    46.300000     0.088241     0.054122     0.052119     0.047884     0.000000     0.000000     0.000000     0.052119     0.080836     0.187000     0.472222     0.437657     0.519411 
    0.750000     0.342828     0.301932     0.655937     71    141    513    497    321    108     25      0      0    397   1726    397   1676     2.764000     2.695354     2.669704     0.262673     0.334852     0.663081     0.666287    44.300000     0.084429     0.051785     0.047652     0.046841     0.000000     0.000000     0.000000     0.047652     0.072187     0.205000     0.517677     0.479784     0.509787 
    0.750000     0.342847     0.301706     0.655836     85    135    488    491    350    107     20      0      0    416   1726    416   1676     2.768000     2.805070     2.750620     0.275244     0.375310     0.649366     0.656173    45.200000     0.086144     0.052837     0.055794     0.049781     0.000000     0.000000     0.000000     0.055794     0.083116     0.195000     0.492424     0.456380     0.526896 
    0.750000     0.342847     0.401022     0.704785    107    251    571    469    216     54      8      0      0    154   1726    154   1676     2.376000     2.195084     2.241006     0.101893     0.120503     0.725615     0.719874    17.200000     0.032781     0.020106     0.015529     0.020282     0.000000     0.000000     0.000000     0.015529     0.033737     0.197000     0.497475     0.461061     0.406765 
    0.750000     0.342847     0.398262     0.703424    114    247    579    428    238     63      7      0      0    165   1726    165   1676     2.385000     2.431197     2.364545     0.109171     0.182272     0.696100     0.704432    20.500000     0.039070     0.023963     0.022822     0.022665     0.469000     0.072332     0.044365     0.022822     0.046004     0.189000     0.477273     0.442338     0.438939 
    0.750000     0.342847     0.399348     0.703960    121    250    554    461    218     64      8      0      0    171   1726    171   1676     2.375000     2.208863     2.267305     0.113141     0.133652     0.723892     0.716587    23.200000     0.044216     0.027120     0.016948     0.022383     0.000000     0.000000     0.000000     0.016948     0.038460     0.204000     0.515152     0.477444     0.413816 
    0.750000     0.342847     0.399436     0.704003    124    227    573    455    232     60      5      0      0    185   1726    185   1676     2.384000     2.309484     2.331516     0.122404     0.165758     0.711315     0.708560    17.400000     0.033162     0.020340     0.020715     0.022392     0.000000     0.000000     0.000000     0.020715     0.042530     0.147000     0.371212     0.344040     0.430565 
    0.750000     0.342847     0.399466     0.704018    112    249    565    464    227     53      6      0      0    154   1726    154   1676     2.375000     2.271757     2.275055     0.101893     0.137527     0.716030     0.715618    20.500000     0.039070     0.023963     0.017380     0.019530     0.000000     0.000000     0.000000     0.017380     0.035907     0.179000     0.452020     0.418934     0.415872 
    0.750000     0.342847     0.499486     0.753314    200    368    588    353    129     38      0      0      0    -32   1726    -32   1676     1.974000     1.793789     1.885525    -0.021173    -0.057237     0.775776     0.764309     8.300000     0.015819     0.009702     0.003043     0.011791     0.220000     0.033930     0.020811     0.003043     0.021810     0.151000     0.381313     0.353402     0.297115 
    0.750000     0.342847     0.496784     0.751983    183    390    571    368    124     36      4      0      0    -58   1726    -58   1676     1.990000     1.705766     1.827330    -0.038375    -0.086335     0.786779     0.771584     6.900000     0.013150     0.008066     0.002051     0.012354     0.184000     0.028378     0.017405     0.002051     0.018028     0.214000     0.540404     0.500848     0.275632 
    0.750000     0.342847     0.502599     0.754849    183    392    582    355    129     31      4      0      0    -52   1726    -52   1676     1.979000     1.869404     1.873329    -0.034406    -0.063335     0.766324     0.765834     6.700000     0.012769     0.007832     0.002814     0.010341     0.000000     0.000000     0.000000     0.002814     0.017164     0.202000     0.510101     0.472763     0.292724 
    0.750000     0.342847     0.602120     0.803899    315    496    533    252     70      8      2      0      0   -229   1726   -229   1676     1.581000     1.651571     1.491964    -0.151517    -0.254018     0.793554     0.813505     1.900000     0.003621     0.002221     0.000010     0.000449     0.046000     0.007094     0.004351     0.000010     0.003440     0.207000     0.522727     0.484465     0.100748 
    0.750000     0.342847     0.597011     0.801381    303    483    564    246     69     11      0      0      0   -218   1726   -218   1676     1.599000     1.552842     1.483919    -0.144239    -0.258041     0.805895     0.814510     2.600000     0.004955     0.003039     0.000007     0.002542     0.063000     0.009716     0.005959     0.000007     0.007001     0.214000     0.540404     0.500848     0.093775 
    0.750000     0.342847     0.600329     0.803016    305    495    562    244     57     13      0      0      0   -226   1726   -226   1676     1.578000     1.183803     1.405482    -0.149532    -0.297259     0.852025     0.824315     2.900000     0.005527     0.003390     0.000000     0.006177     0.071000     0.010950     0.006716     0.000000     0.008202     0.274000     0.691919     0.641273     0.000000 
    0.750000     0.342847     0.598068     0.801902    307    502    539    253     63     12      0      0      0   -233   1726   -233   1676     1.582000     1.327387     1.429988    -0.154163    -0.285006     0.834077     0.821251     2.200000     0.004193     0.002572     0.000000     0.004440     0.054000     0.008328     0.005108     0.000000     0.007464     0.224000     0.565657     0.524252     0.025193 
    0.750000     0.342847     0.598156     0.801945    275    519    578    234     63      7      0      0      0   -260   1726   -260   1676     1.589000     1.587699     1.415552    -0.172028    -0.292224     0.801538     0.823056     2.000000     0.003812     0.002338     0.000000    -0.000238     0.050000     0.007711     0.004730     0.000000     0.003930     0.220000     0.555556     0.514890     0.000000 
    0.750000     0.342847     0.700144     0.852212    496    588    410    148     31      3      0      0      0   -320   1726   -320   1676     1.188000     1.317400     1.147792    -0.211727    -0.426104     0.835325     0.856526     1.000000     0.001906     0.001169     0.000000     0.000371     0.025000     0.003856     0.002365     0.000000     0.002604     0.234000     0.590909     0.547656     0.000000 
    0.750000     0.342847     0.700996     0.852631    488    585    437    142     23      1      0      0      0   -332   1726   -332   1676     1.183000     1.318159     1.081215    -0.219666    -0.459393     0.835230     0.864848     0.700000     0.001334     0.000818     0.000000    -0.000194     0.000000     0.000000     0.000000     0.000000     0.000528     0.242000     0.611111     0.566379     0.000000 
    0.750000     0.342828     0.697921     0.851112    469    602    426    156     21      2      0      0      0   -333   1726   -333   1676     1.203000     1.146462     1.082706    -0.220328    -0.458647     0.856692     0.864662     0.800000     0.001525     0.000935     0.000000     0.000325     0.000000     0.000000     0.000000     0.000000     0.000418     0.248000     0.626263     0.580422     0.000000 
    0.750000     0.342847     0.701788     0.853022    492    568    462    127     27      0      0      0      0   -328   1726   -328   1676     1.182000     1.642374     1.108211    -0.217020    -0.445895     0.794703     0.861474     0.800000     0.001525     0.000935     0.000000    -0.002392     0.000000     0.000000     0.000000     0.000000    -0.001003     0.220000     0.555556     0.514890     0.000000 
    0.750000     0.342847     0.700819     0.852544    477    604    438    130     26      1      0      0      0   -354   1726   -354   1676     1.181000     1.449751     1.074110    -0.234222    -0.462945     0.818781     0.865736     0.800000     0.001525     0.000935     0.000000    -0.001035     0.000000     0.000000     0.000000     0.000000     0.000617     0.262000     0.661616     0.613188     0.000000 
