# Supplementary material
Source: publisher figshare collection journal article supplement (https://frontiersin.figshare.com/ndownloader/files/13649807)
Supplement: Supplementary file 1 [file 13649807 › SupplementaryData-cub-RVE12-CUT50.dat]

   z_x/z_bcc     zeta_ini         zeta     zeta_tot    N_0    N_1    N_2    N_3    N_4    N_5    N_6    N_7    N_8      g  N_J,t  g^(i) N_J,t^(i)     z_avg        z_avg        z_avg         g_V*         g_V*     zeta_tot     zeta_tot            E         E/E0     E/E0,bcc     E/E0,bcc     E/E0,bcc           sy       sy/sy0   sy/sy0,bcc   sy/sy0,bcc   sy/sy0,bcc           nu       nu/nu0   nu/nu0,bcc   nu/nu0,bcc
         [-]          [-]          [-]          [-]    [-]    [-]    [-]    [-]    [-]    [-]    [-]    [-]    [-]    [-]    [-]    [-]    [-]          [-]          [-]          [-]          [-]          [-]          [-]          [-]        [MPa]          [-]          [-]          [-]          [-]        [MPa]          [-]          [-]          [-]          [-]          [-]          [-]          [-]          [-]
         RVE          RVE          RVE          RVE    RVE    RVE    RVE    RVE    RVE    RVE    RVE    RVE    RVE    RVE    RVE    RVE    RVE          RVE         ANN3       ANN3gi          RVE       ANN3gi         ANN3       ANN3gi          RVE          RVE          RVE           MC      MC+ANN3          RVE          RVE          RVE           MC      MC+ANN3          RVE          RVE          RVE           MC
    0.750000     0.519597     0.000000     0.639698     35    201    395    499    373    144     29      0      0    427   1726    427   1676     2.908000     2.912955     2.778247     0.282523     0.389123     0.635881     0.652719    44.800000     0.085382     0.052369     0.058715     0.052378     0.000000     0.000000     0.000000     0.058715     0.087250     0.192000     0.484848     0.449359     0.532599 
    0.750000     0.519597     0.099261     0.675462    100    198    477    504    279    106     12      0      0    280   1726    280   1676     2.615000     2.435174     2.443786     0.185261     0.221893     0.695603     0.694527    28.400000     0.054126     0.033198     0.028345     0.030486     0.000000     0.000000     0.000000     0.028345     0.054573     0.186000     0.469697     0.435316     0.458414 
    0.750000     0.519597     0.102756     0.676721     95    199    500    473    298     98     13      0      0    270   1726    270   1676     2.612000     2.623452     2.529216     0.178644     0.264608     0.672068     0.683848    22.400000     0.042691     0.026185     0.035035     0.032482     0.000000     0.000000     0.000000     0.035035     0.062588     0.203000     0.512626     0.475103     0.478516 
    0.750000     0.519597     0.100345     0.675852     89    203    483    493    310     83     15      0      0    284   1726    284   1676     2.621000     2.617204     2.539535     0.187907     0.269767     0.672850     0.682558    24.800000     0.047265     0.028990     0.035894     0.033268     0.000000     0.000000     0.000000     0.035894     0.059515     0.126000     0.318182     0.294892     0.480886 
    0.750000     0.519578     0.103314     0.676909     96    199    495    480    299     89     18      0      0    275   1726    275   1676     2.612000     2.618942     2.528706     0.181952     0.264353     0.672632     0.683912    24.600000     0.046884     0.028756     0.034993     0.033869     0.000000     0.000000     0.000000     0.034993     0.059141     0.178000     0.449495     0.416593     0.478398 
    0.750000     0.519578     0.101868     0.676388    101    193    490    490    289     98     15      0      0    291   1726    291   1676     2.613000     2.536600     2.504226     0.192539     0.252113     0.682925     0.686972    28.900000     0.055079     0.033783     0.033000     0.033433     0.000000     0.000000     0.000000     0.033000     0.058803     0.017000     0.042929     0.039787     0.472726 
    0.750000     0.519597     0.202659     0.712716    151    236    556    443    241     37     12      0      0    133   1726    133   1676     2.326000     2.460006     2.344422     0.087999     0.172211     0.692499     0.706947    11.800000     0.022489     0.013794     0.021525     0.018317     0.000000     0.000000     0.000000     0.021525     0.028407     0.196000     0.494949     0.458720     0.433856 
    0.750000     0.519597     0.193741     0.709503    140    223    589    436    218     63      7      0      0    137   1726    137   1676     2.350000     2.283346     2.262952     0.090645     0.131476     0.714582     0.717131    13.200000     0.025157     0.015430     0.016708     0.020331     0.000000     0.000000     0.000000     0.016708     0.039304     0.166000     0.419192     0.388508     0.412657 
    0.750000     0.519578     0.194939     0.709923    143    222    589    445    217     55      5      0      0    123   1726    123   1676     2.332000     2.254453     2.234879     0.081382     0.117439     0.718193     0.720640    12.600000     0.024014     0.014729     0.015209     0.017983     0.000000     0.000000     0.000000     0.015209     0.035692     0.187000     0.472222     0.437657     0.405106 
    0.750000     0.519578     0.294356     0.745745    210    273    637    371    151     31      3      0      0     -7   1726     -7   1676     2.051000     2.051928     1.996374    -0.004632    -0.001813     0.743509     0.750453     5.900000     0.011245     0.006897     0.005679     0.009462     0.000000     0.000000     0.000000     0.005679     0.019274     0.123000     0.310606     0.287871     0.334738 
    0.750000     0.519597     0.302523     0.748697    244    256    612    373    161     27      3      0      0     10   1726     10   1676     2.026000     2.162426     2.061882     0.006616     0.030941     0.729697     0.742265     7.100000     0.013532     0.008300     0.007746     0.007889     0.000000     0.000000     0.000000     0.007746     0.017935     0.148000     0.373737     0.346381     0.355321 
    0.750000     0.519597     0.296899     0.746671    218    257    642    387    135     35      2      0      0      0   1726      0   1676     2.046000     1.771353     1.926019     0.000000    -0.036991     0.778581     0.759248     4.300000     0.008195     0.005026     0.003887     0.012171     0.000000     0.000000     0.000000     0.003887     0.019455     0.178000     0.449495     0.416593     0.311314 
    0.750000     0.519578     0.301466     0.748307    223    272    618    384    145     29      5      0      0    -10   1726    -10   1676     2.038000     1.970672     1.964432    -0.006616    -0.017784     0.753666     0.754446     4.400000     0.008386     0.005143     0.004813     0.009720     0.000000     0.000000     0.000000     0.004813     0.016274     0.159000     0.401515     0.372125     0.324286 
    0.750000     0.519597     0.294609     0.745846    213    276    626    377    150     28      6      0      0     -5   1726     -5   1676     2.050000     2.060754     1.999746    -0.003308    -0.000127     0.742406     0.750032     4.700000     0.008957     0.005494     0.005776     0.009451     0.000000     0.000000     0.000000     0.005776     0.016122     0.151000     0.381313     0.353402     0.335825 
    0.750000     0.519597     0.402587     0.784751    324    328    619    290     97     16      2      0      0   -113   1726   -113   1676     1.740000     1.829347     1.741272    -0.074766    -0.129364     0.771332     0.782341     1.600000     0.003049     0.001870     0.001010     0.003736     0.000000     0.000000     0.000000     0.001010     0.009044     0.143000     0.361111     0.334679     0.241005 
    0.750000     0.519597     0.400498     0.783998    307    345    609    315     85     13      2      0      0   -118   1726   -118   1676     1.745000     1.529628     1.680576    -0.078074    -0.159712     0.808796     0.789928     1.900000     0.003621     0.002221     0.000538     0.003260     0.000000     0.000000     0.000000     0.000538     0.006380     0.144000     0.363636     0.337019     0.213900 
    0.750000     0.519597     0.492729     0.817229    407    424    564    221     55      5      0      0      0   -228   1726   -228   1676     1.468000     1.528247     1.418257    -0.150855    -0.290872     0.808969     0.822718     0.700000     0.001334     0.000818     0.000000    -0.000725     0.000000     0.000000     0.000000     0.000000     0.002716     0.133000     0.335859     0.311275     0.000000 
    0.750000     0.519597     0.498996     0.819487    431    398    569    221     45     12      0      0      0   -205   1726   -205   1676     1.455000     0.971416     1.369539    -0.135637    -0.315230     0.878573     0.828808     0.700000     0.001334     0.000818     0.000000     0.006948     0.000000     0.000000     0.000000     0.000000     0.007504     0.156000     0.393939     0.365104     0.000000 
    0.750000     0.519597     0.488792     0.815811    423    375    601    221     49      6      1      0      0   -191   1726   -191   1676     1.475000     1.327998     1.438548    -0.126374    -0.280726     0.834000     0.820181     0.600000     0.001144     0.000701     0.000000     0.001424     0.000000     0.000000     0.000000     0.000000     0.003530     0.160000     0.404040     0.374466     0.041826 
    0.750000     0.519597     0.499317     0.819603    425    396    594    205     45     10      1      0      0   -215   1726   -215   1676     1.453000     1.134585     1.361534    -0.142254    -0.319233     0.858177     0.829808     0.900000     0.001715     0.001052     0.000000     0.005733     0.000000     0.000000     0.000000     0.000000     0.007076     0.200000     0.505051     0.468082     0.000000 
    0.750000     0.519597     0.503655     0.821166    430    402    575    211     54      4      0      0      0   -229   1726   -229   1676     1.445000     1.608794     1.415668    -0.151517    -0.292166     0.798901     0.823042     0.500000     0.000953     0.000584     0.000000    -0.001736     0.000000     0.000000     0.000000     0.000000     0.001799     0.227000     0.573232     0.531273     0.000000 
    0.750000     0.519597     0.608821     0.859057    567    475    471    143     20      0      0      0      0   -298   1726   -298   1676     1.149000     1.440733     1.104902    -0.197170    -0.447549     0.819908     0.861887     0.200000     0.000381     0.000234     0.000000    -0.000539     0.000000     0.000000     0.000000     0.000000    -0.000477     0.183000     0.462121     0.428295     0.000000 
    0.750000     0.519578     0.615505     0.861460    581    487    449    128     28      3      0      0      0   -295   1726   -295   1676     1.131000     1.334675     1.139415    -0.195185    -0.430293     0.833166     0.857573     0.200000     0.000381     0.000234     0.000000     0.000597     0.000000     0.000000     0.000000     0.000000     0.003125     0.177000     0.446970     0.414253     0.000000 
    0.750000     0.519578     0.595943     0.854412    546    467    504    135     22      2      0      0      0   -273   1726   -273   1676     1.180000     1.177604     1.121650    -0.180629    -0.439175     0.852799     0.859794     0.300000     0.000572     0.000351     0.000000     0.000563     0.000000     0.000000     0.000000     0.000000     0.001395     0.187000     0.472222     0.437657     0.000000 
    0.750000     0.519597     0.597935     0.855135    562    462    497    121     30      4      0      0      0   -278   1726   -278   1676     1.169000     1.426273     1.175101    -0.183937    -0.412449     0.821716     0.853112     0.300000     0.000572     0.000351     0.000000     0.001371     0.000000     0.000000     0.000000     0.000000     0.004797     0.197000     0.497475     0.461061     0.000000 
    0.750000     0.519597     0.597212     0.854875    574    450    487    137     21      7      0      0      0   -290   1726   -290   1676     1.166000     0.699194     1.088642    -0.191877    -0.455679     0.912601     0.863920     0.300000     0.000572     0.000351     0.000000     0.006125     0.000000     0.000000     0.000000     0.000000     0.004924     0.153000     0.386364     0.358083     0.000000 
    0.750000     0.519578     0.697690     0.891073    753    475    368     67     11      1      1      0      0   -298   1726   -298   1676     0.875000     1.205268     0.911053    -0.197170    -0.544474     0.849341     0.886118     0.100000     0.000191     0.000117     0.000000     0.001048     0.000000     0.000000     0.000000     0.000000     0.001079     0.195000     0.492424     0.456380     0.000000 
    0.750000     0.519597     0.703744     0.893258    746    500    354     69      7      0      0      0      0   -322   1726   -322   1676     0.861000     1.483340     0.823081    -0.213050    -0.588460     0.814582     0.897115     0.100000     0.000191     0.000117     0.000000    -0.001198     0.000000     0.000000     0.000000     0.000000    -0.001584     0.166000     0.419192     0.388508     0.000000 
    0.750000     0.519578     0.702952     0.892969    736    504    374     51      9      2      0      0      0   -320   1726   -320   1676     0.866000     0.923914     0.824776    -0.211727    -0.587612     0.884511     0.896903     0.100000     0.000191     0.000117     0.000000     0.004113     0.000000     0.000000     0.000000     0.000000     0.004579     0.162000     0.409091     0.379147     0.000000 
    0.750000     0.519578     0.694115     0.889785    718    501    387     61      8      1      0      0      0   -318   1726   -318   1676     0.892000     1.071407     0.820193    -0.210403    -0.589903     0.866074     0.897476     0.100000     0.000191     0.000117     0.000000     0.000578     0.000000     0.000000     0.000000     0.000000     0.000550     0.196000     0.494949     0.458720     0.000000 
    0.750000     0.519578     0.700663     0.892144    753    477    370     72      4      0      0      0      0   -310   1726   -310   1676     0.865000     1.689432     0.827676    -0.205110    -0.586162     0.788821     0.896540     0.100000     0.000191     0.000117     0.000000    -0.004408     0.000000     0.000000     0.000000     0.000000    -0.004132     0.194000     0.489899     0.454040     0.000000 
