# Supplementary material
Source: publisher figshare collection journal article supplement (https://frontiersin.figshare.com/ndownloader/files/13649807)
Supplement: Supplementary file 1 [file 13649807 › SupplementaryData-cub-RVE12.dat]

   z_x/z_bcc     zeta_ini         zeta     zeta_tot    N_0    N_1    N_2    N_3    N_4    N_5    N_6    N_7    N_8      g  N_J,t  g^(i) N_J,t^(i)     z_avg        z_avg        z_avg         g_V*         g_V*     zeta_tot     zeta_tot            E         E/E0     E/E0,bcc     E/E0,bcc     E/E0,bcc           sy       sy/sy0   sy/sy0,bcc   sy/sy0,bcc   sy/sy0,bcc           nu       nu/nu0   nu/nu0,bcc   nu/nu0,bcc
         [-]          [-]          [-]          [-]    [-]    [-]    [-]    [-]    [-]    [-]    [-]    [-]    [-]    [-]    [-]    [-]    [-]          [-]          [-]          [-]          [-]          [-]          [-]          [-]        [MPa]          [-]          [-]          [-]          [-]        [MPa]          [-]          [-]          [-]          [-]          [-]          [-]          [-]          [-]
         RVE          RVE          RVE          RVE    RVE    RVE    RVE    RVE    RVE    RVE    RVE    RVE    RVE    RVE    RVE    RVE    RVE          RVE         ANN3       ANN3gi          RVE       ANN3gi         ANN3       ANN3gi          RVE          RVE          RVE           MC      MC+ANN3          RVE          RVE          RVE           MC      MC+ANN3          RVE          RVE          RVE           MC
    0.750000     0.000000     0.000000     0.250000      0      0      0      0      0      0   1676      0      0   2699   1726   2699   1676     6.000000     5.997537     5.969409     1.785781     1.984704     0.250308     0.253824   524.700000     1.000000     0.613349     0.607459     0.598839     6.484000     1.000000     0.613349     0.607459     0.602537     0.396000     1.000000     0.926803     0.924772 
    0.750000     0.000000     0.099712     0.324784      0      0      2     23    171    584    896      0      0   2265   1726   2265   1676     5.402000     5.345508     5.408149     1.498627     1.704074     0.331812     0.323981   424.500000     0.809034     0.496220     0.499784     0.492766     5.428000     0.837138     0.513457     0.499784     0.512871     0.372000     0.939394     0.870633     0.882760 
    0.750000     0.000000     0.100523     0.325392      0      1      4     24    154    608    885      0      0   2259   1726   2259   1676     5.398000     5.327522     5.406192     1.494657     1.703096     0.334060     0.324226   421.600000     0.803507     0.492830     0.499411     0.489813     5.576000     0.859963     0.527457     0.499411     0.513802     0.374000     0.944444     0.875314     0.882598 
    0.750000     0.000000     0.100349     0.325262      0      1      5     30    165    565    910      0      0   2261   1726   2261   1676     5.397000     5.358787     5.403494     1.495980     1.701747     0.330152     0.324563   423.600000     0.807318     0.495168     0.498895     0.493157     5.695000     0.878316     0.538714     0.498895     0.509397     0.377000     0.952020     0.882335     0.882373 
    0.750000     0.000000     0.099423     0.324567      0      0      0     19    166    600    891      0      0   2274   1726   2274   1676     5.410000     5.338976     5.418809     1.504582     1.709404     0.332628     0.322649   419.700000     0.799886     0.490609     0.501820     0.493477     5.218000     0.804750     0.493592     0.501820     0.516278     0.373000     0.941919     0.872973     0.883644 
    0.750000     0.000000     0.099809     0.324857      0      0      3     27    150    602    894      0      0   2272   1726   2272   1676     5.406000     5.333746     5.413330     1.503258     1.706665     0.333282     0.323334   423.000000     0.806175     0.494466     0.500774     0.491642     5.386000     0.830660     0.509484     0.500774     0.513885     0.373000     0.941919     0.872973     0.883190 
    0.750000     0.000000     0.198962     0.399221      0      1     24    140    433    618    460      0      0   1820   1726   1820   1676     4.804000     4.815580     4.805662     1.204195     1.402831     0.398052     0.399292   324.700000     0.618830     0.379558     0.385658     0.372768     4.756000     0.733498     0.449890     0.385658     0.428588     0.348000     0.878788     0.814463     0.827112 
    0.750000     0.000000     0.197862     0.398396      0      3     25    152    381    670    445      0      0   1827   1726   1827   1676     4.805000     4.812350     4.780484     1.208826     1.390242     0.398456     0.402439   320.000000     0.609872     0.374064     0.380944     0.365849     4.272000     0.658853     0.404106     0.380944     0.418173     0.343000     0.866162     0.802761     0.824532 
    0.750000     0.000000     0.199174     0.399381      0      6     23    141    402    666    438      0      0   1821   1726   1821   1676     4.798000     4.819007     4.799174     1.204856     1.399587     0.397624     0.400103   322.100000     0.613875     0.376519     0.384443     0.369912     4.673000     0.720697     0.442039     0.384443     0.425217     0.348000     0.878788     0.814463     0.826449 
    0.750000     0.000000     0.197379     0.398035      0      0     28    142    404    651    451      0      0   1838   1726   1838   1676     4.808000     4.822145     4.812177     1.216104     1.406088     0.397232     0.398478   327.800000     0.624738     0.383182     0.386879     0.372830     4.743000     0.731493     0.448660     0.386879     0.427715     0.350000     0.883838     0.819144     0.827776 
    0.750000     0.000000     0.203574     0.402680      0      1     31    151    396    647    450      0      0   1822   1726   1822   1676     4.794000     4.809149     4.786055     1.205518     1.393027     0.398856     0.401743   316.000000     0.602249     0.369389     0.381986     0.367761     4.127000     0.636490     0.390390     0.381986     0.421006     0.342000     0.863636     0.800420     0.825105 
    0.750000     0.000000     0.299330     0.474498      1     21     96    302    550    510    196      0      0   1389   1726   1389   1676     4.203000     4.209292     4.271639     0.919025     1.135819     0.473838     0.466045   220.200000     0.419668     0.257403     0.287244     0.271638     3.219000     0.496453     0.304499     0.287244     0.328839     0.318000     0.803030     0.744251     0.767648 
    0.750000     0.000000     0.300025     0.475019      3     23     91    295    557    513    194      0      0   1403   1726   1403   1676     4.205000     4.223039     4.301628     0.928289     1.150814     0.472120     0.462296   223.600000     0.426148     0.261377     0.292662     0.276845     3.298000     0.508637     0.311972     0.292662     0.335797     0.304000     0.767677     0.711485     0.771264 
    0.750000     0.000000     0.297111     0.472833      3     12    103    325    532    484    217      0      0   1390   1726   1390   1676     4.202000     4.161967     4.201594     0.919687     1.100797     0.479754     0.474801   228.900000     0.436249     0.267573     0.274654     0.260543     3.455000     0.532850     0.326823     0.274654     0.310928     0.313000     0.790404     0.732549     0.759066 
    0.750000    -0.000019     0.299923     0.474932      1     13    106    302    525    556    173      0      0   1399   1726   1399   1676     4.206000     4.236539     4.286710     0.925642     1.143355     0.470433     0.464161   220.200000     0.419668     0.257403     0.289965     0.273376     3.154000     0.486428     0.298350     0.289965     0.331913     0.305000     0.770202     0.713825     0.769470 
    0.750000     0.000000     0.300816     0.475612      3     12    106    316    545    493    201      0      0   1382   1726   1382   1676     4.190000     4.170130     4.228812     0.914394     1.114406     0.478734     0.471398   227.500000     0.433581     0.265936     0.279535     0.264554     3.554000     0.548118     0.336188     0.279535     0.318827     0.317000     0.800505     0.741910     0.762424 
    0.750000     0.000000     0.399274     0.549456      9     63    225    453    534    322     70      0      0    957   1726    957   1676     3.603000     3.512923     3.581839     0.633195     0.790919     0.560885     0.552270   136.700000     0.260530     0.159796     0.168756     0.150447     2.341000     0.361043     0.221445     0.168756     0.206497     0.277000     0.699495     0.648294     0.674037 
    0.750000     0.000000     0.400780     0.550585      7     71    237    435    523    324     79      0      0    968   1726    968   1676     3.601000     3.557968     3.628148     0.640473     0.814074     0.555254     0.546481   133.400000     0.254241     0.155938     0.176225     0.159011     2.151000     0.331740     0.203472     0.176225     0.212985     0.251000     0.633838     0.587443     0.681008 
    0.750000     0.000000     0.401011     0.550758      6     72    218    451    539    322     68      0      0    964   1726    964   1676     3.601000     3.515943     3.596447     0.637826     0.798224     0.560507     0.550444   134.100000     0.255575     0.156756     0.171102     0.152058     2.230000     0.343924     0.210945     0.171102     0.209759     0.262000     0.661616     0.613188     0.676248 
    0.750000     0.000000     0.399255     0.549441      8     63    208    498    514    315     70      0      0    949   1726    949   1676     3.594000     3.409238     3.452133     0.627902     0.726067     0.573845     0.568483   133.900000     0.255193     0.156523     0.148343     0.133799     2.349000     0.362276     0.222202     0.148343     0.181002     0.267000     0.674242     0.624890     0.653919 
    0.750000     0.000000     0.501611     0.626209     22    172    385    541    360    172     24      0      0    514   1726    514   1676     2.989000     2.771649     2.766033     0.340086     0.383016     0.653544     0.654246    63.100000     0.120259     0.073761     0.057415     0.054063     1.149000     0.177205     0.108689     0.057415     0.084937     0.236000     0.595960     0.552337     0.530086 
    0.750000     0.000000     0.500492     0.625369     20    164    420    482    408    159     23      0      0    512   1726    512   1676     2.992000     3.042647     2.951495     0.338762     0.475747     0.619669     0.631063    58.700000     0.111873     0.068617     0.078564     0.065510     1.119000     0.172579     0.105851     0.078564     0.112503     0.229000     0.578283     0.535954     0.566879 
    0.750000    -0.000019     0.499228     0.624414     22    143    433    490    401    168     19      0      0    535   1726    535   1676     3.005000     3.004989     2.950477     0.353980     0.475238     0.624376     0.631190    65.900000     0.125596     0.077034     0.078440     0.065648     1.196000     0.184454     0.113135     0.078440     0.113040     0.248000     0.626263     0.580422     0.566684 
    0.750000     0.000000     0.501496     0.626122     27    147    403    520    417    126     36      0      0    527   1726    527   1676     2.999000     2.984721     2.897964     0.348687     0.448982     0.626910     0.637754    58.700000     0.111873     0.068617     0.072158     0.064312     1.053000     0.162400     0.099608     0.072158     0.097701     0.229000     0.578283     0.535954     0.556548 
    0.750000     0.000000     0.600745     0.700559     75    310    527    460    246     52      6      0      0    137   1726    137   1676     2.401000     2.390440     2.307770     0.090645     0.153885     0.701195     0.711529    24.100000     0.045931     0.028172     0.019271     0.018208     0.581000     0.089605     0.054959     0.019271     0.036975     0.208000     0.525253     0.486805     0.424445 
    0.750000     0.000000     0.599838     0.699878     77    306    527    466    221     69     10      0      0    189   1726    189   1676     2.415000     2.214453     2.286693     0.125051     0.143346     0.723193     0.714163    24.300000     0.046312     0.028406     0.018040     0.024233     0.551000     0.084978     0.052121     0.018040     0.039821     0.203000     0.512626     0.475103     0.418941 
    0.750000     0.000000     0.599703     0.699777     73    295    553    467    228     56      4      0      0    148   1726    148   1676     2.397000     2.254384     2.260124     0.097924     0.130062     0.718202     0.717485    23.100000     0.044025     0.027003     0.016553     0.018700     0.566000     0.087292     0.053540     0.016553     0.036836     0.248000     0.626263     0.580422     0.411902 
    0.750000     0.000000     0.599413     0.699560     80    308    509    474    237     62      6      0      0    171   1726    171   1676     2.412000     2.286172     2.294442     0.113141     0.147221     0.714228     0.713195    25.900000     0.049362     0.030276     0.018487     0.021008     0.580000     0.089451     0.054865     0.018487     0.039863     0.223000     0.563131     0.521912     0.420973 
    0.750000     0.000000     0.600127     0.700096     72    303    541    455    246     55      4      0      0    157   1726    157   1676     2.406000     2.391778     2.335320     0.103878     0.167660     0.701028     0.708085    22.700000     0.043263     0.026535     0.020952     0.019584     0.554000     0.085441     0.052405     0.020952     0.040998     0.239000     0.603535     0.559358     0.431537 
    0.750000     0.000000     0.699647     0.774735    195    493    568    320     84     15      1      0      0   -175   1726   -175   1676     1.794000     1.433805     1.584425    -0.115788    -0.207787     0.820774     0.801947     6.800000     0.012960     0.007949     0.000133     0.004162     0.196000     0.030228     0.018540     0.000133     0.007391     0.276000     0.696970     0.645953     0.164080 
    0.750000     0.000000     0.701287     0.775965    206    509    538    308     95     19      1      0      0   -186   1726   -186   1676     1.784000     1.646292     1.610030    -0.123066    -0.194985     0.794213     0.798746     5.900000     0.011245     0.006897     0.000206     0.005476     0.168000     0.025910     0.015892     0.000206     0.010405     0.276000     0.696970     0.645953     0.178418 
