# Supplementary material
Source: publisher figshare collection journal article supplement (https://frontiersin.figshare.com/ndownloader/files/13649807)
Supplement: Supplementary file 1 [file 13649807 › SupplementaryData-dia-RVE6-A10.dat]

   z_x/z_bcc     zeta_ini         zeta     zeta_tot    N_0    N_1    N_2    N_3    N_4    N_5    N_6    N_7    N_8      g  N_J,t  g^(i) N_J,t^(i)     z_avg        z_avg        z_avg         g_V*         g_V*     zeta_tot     zeta_tot            E         E/E0     E/E0,bcc     E/E0,bcc     E/E0,bcc           sy       sy/sy0   sy/sy0,bcc   sy/sy0,bcc   sy/sy0,bcc           nu       nu/nu0   nu/nu0,bcc   nu/nu0,bcc
         [-]          [-]          [-]          [-]    [-]    [-]    [-]    [-]    [-]    [-]    [-]    [-]    [-]    [-]    [-]    [-]    [-]          [-]          [-]          [-]          [-]          [-]          [-]          [-]        [MPa]          [-]          [-]          [-]          [-]        [MPa]          [-]          [-]          [-]          [-]          [-]          [-]          [-]          [-]
         RVE          RVE          RVE          RVE    RVE    RVE    RVE    RVE    RVE    RVE    RVE    RVE    RVE    RVE    RVE    RVE    RVE          RVE         ANN3       ANN3gi          RVE       ANN3gi         ANN3       ANN3gi          RVE          RVE          RVE           MC      MC+ANN3          RVE          RVE          RVE           MC      MC+ANN3          RVE          RVE          RVE           MC
    0.500000     0.000000     0.000000     0.500000      0      0      0      0   1729      0      0      0      0   1335   2590   1333   1729     4.000000     3.981662     4.004110     0.677293     1.002055     0.502292     0.499486  2462.000000     1.000000     0.239000     0.239717     0.224844    31.349000     1.000000     0.239000     0.239717     0.226786     0.286000     1.000000     0.733265     0.733808 
    0.500000     0.000768     0.000000     0.500384      0      0      0      0   1727      0      0      0      0   1333   2585   1331   1727     4.000000     3.981662     4.003732     0.676279     1.001866     0.502292     0.499533  2466.400000     1.001787     0.239427     0.239651     0.224778    31.123000     0.992791     0.237277     0.239651     0.226720     0.290000     1.013986     0.743520     0.733758 
    0.500000     0.005698     0.000000     0.502849      0      0      0      0   1704      0      0      0      0   1311   2553   1309   1704     4.000000     3.981662     4.000160     0.665117     1.000080     0.502292     0.499980  2439.300000     0.990780     0.236796     0.239028     0.224155    30.284000     0.966028     0.230880     0.239028     0.226097     0.288000     1.006993     0.738393     0.733286 
    0.500000     0.003137     0.000000     0.501569      0      0      0      0   1717      0      0      0      0   1329   2592   1320   1717     4.000000     3.981662     4.001000     0.674249     1.000500     0.502292     0.499875  2474.200000     1.004955     0.240184     0.239174     0.224302    31.079000     0.991387     0.236941     0.239174     0.226243     0.291000     1.017483     0.746084     0.733397 
    0.500000     0.006146     0.000000     0.503073      0      0      0      0   1708      0      0      0      0   1314   2554   1312   1708     4.000000     3.981662     4.000099     0.666639     1.000050     0.502292     0.499988  2449.800000     0.995045     0.237815     0.239017     0.224144    30.390000     0.969409     0.231688     0.239017     0.226086     0.290000     1.013986     0.743520     0.733278 
    0.500000    -0.000064     0.101665     0.550804      0      6     89    517   1117      0      0      0      0   1015   2590   1018   1729     3.588000     3.610529     3.619534     0.514946     0.809767     0.548684     0.547558  1485.700000     0.603452     0.144225     0.174829     0.153012    17.238000     0.549874     0.131420     0.174829     0.147770     0.239000     0.835664     0.612763     0.679719 
    0.500000     0.000768     0.098289     0.549491      0      4     81    506   1136      0      0      0      0   1039   2585   1046   1727     3.606000     3.619684     3.645815     0.527122     0.822907     0.547539     0.544273  1637.500000     0.665110     0.158961     0.179098     0.157078    20.061000     0.639925     0.152942     0.179098     0.152019     0.263000     0.919580     0.674296     0.683639 
    0.500000     0.005762     0.103806     0.554485      0     10     76    512   1106      0      0      0      0   1005   2553   1005   1704     3.593000     3.610485     3.616754     0.509873     0.808377     0.548689     0.547906  1555.000000     0.631600     0.150952     0.174379     0.152563    19.111000     0.609621     0.145699     0.174379     0.147320     0.251000     0.877622     0.643530     0.679303 
    0.500000     0.003137     0.102184     0.552500      0     11     76    511   1119      0      0      0      0   1021   2592   1016   1717     3.595000     3.613807     3.621992     0.517990     0.810996     0.548274     0.547251  1535.700000     0.623761     0.149079     0.175227     0.153339    18.699000     0.596478     0.142558     0.175227     0.148159     0.252000     0.881119     0.646094     0.680088 
    0.500000     0.006146     0.097146     0.551348      0      7     96    461   1144      0      0      0      0   1014   2554   1016   1708     3.605000     3.641266     3.653384     0.514439     0.826692     0.544842     0.543327  1597.000000     0.648660     0.155029     0.180332     0.157766    19.957000     0.636607     0.152149     0.180332     0.153290     0.261000     0.912587     0.669168     0.684761 
    0.500000     0.000000     0.205327     0.602663      0     56    293    678    702      0      0      0      0    686   2590    708   1729     3.172000     3.173465     3.262232     0.348032     0.631116     0.603317     0.592221   838.300000     0.340496     0.081378     0.120004     0.099543    10.733000     0.342371     0.081827     0.120004     0.096667     0.215000     0.751748     0.551231     0.622774 
    0.500000     0.000768     0.200038     0.600327      0     52    273    677    725      0      0      0      0    717   2585    737   1727     3.202000     3.208463     3.294660     0.363760     0.647330     0.598942     0.588167   901.200000     0.366044     0.087484     0.124699     0.104295    11.443000     0.365020     0.087240     0.124699     0.101109     0.230000     0.804196     0.589689     0.628243 
    0.500000     0.005698     0.205023     0.604776      0     46    271    721    666      0      0      0      0    691   2553    712   1704     3.178000     3.049572     3.213704     0.350569     0.606852     0.618804     0.598287   813.200000     0.330301     0.078942     0.113097     0.092418     9.632000     0.307251     0.073433     0.113097     0.090631     0.217000     0.758741     0.556358     0.614469 
    0.500000     0.003137     0.206680     0.604584      0     68    273    684    692      0      0      0      0    680   2592    703   1717     3.165000     3.148865     3.249472     0.344988     0.624736     0.606392     0.593816   823.500000     0.334484     0.079942     0.118173     0.097671    10.356000     0.330345     0.078952     0.118173     0.095012     0.220000     0.769231     0.564050     0.620605 
    0.500000     0.006146     0.200219     0.602567      0     40    266    709    693      0      0      0      0    709   2554    724   1708     3.203000     3.111622     3.243182     0.359701     0.621591     0.611047     0.594602   856.300000     0.347807     0.083126     0.117275     0.096707    10.586000     0.337682     0.080706     0.117275     0.094376     0.213000     0.744755     0.546103     0.619532 
    0.500000     0.000000     0.296754     0.648377      0    140    473    702    414      0      0      0      0    422   2590    453   1729     2.804000     2.638018     2.824834     0.214096     0.412417     0.670248     0.646896   375.800000     0.152640     0.036481     0.063796     0.043486     0.000000     0.000000     0.000000     0.063796     0.045910     0.187000     0.653846     0.479442     0.542063 
    0.500000     0.000768     0.306273     0.653403      0    158    462    715    392      0      0      0      0    398   2585    431   1727     2.776000     2.590698     2.762401     0.201920     0.381200     0.676163     0.654700   358.800000     0.145735     0.034831     0.057031     0.037309     0.000000     0.000000     0.000000     0.057031     0.040306     0.169000     0.590909     0.433293     0.529337 
    0.500000     0.005698     0.305538     0.654747      0    163    442    718    381      0      0      0      0    388   2553    420   1704     2.773000     2.570218     2.735192     0.196846     0.367596     0.678723     0.658101   355.100000     0.144232     0.034471     0.054194     0.034811     4.795000     0.152955     0.036556     0.054194     0.038036     0.167000     0.583916     0.428165     0.523682 
    0.500000     0.003137     0.302119     0.652154      0    162    451    710    394      0      0      0      0    393   2592    419   1717     2.778000     2.598366     2.754129     0.199383     0.377064     0.675204     0.655734   334.700000     0.135946     0.032491     0.056161     0.036326     0.000000     0.000000     0.000000     0.056161     0.039234     0.143000     0.500000     0.366632     0.527624 
    0.500000     0.006146     0.306835     0.655548      0    152    464    701    391      0      0      0      0    382   2554    417   1708     2.779000     2.601621     2.760211     0.193802     0.380105     0.674797     0.654974   367.500000     0.149269     0.035675     0.056800     0.036919     4.943000     0.157676     0.037685     0.056800     0.039788     0.179000     0.625874     0.458932     0.528884 
    0.500000     0.000000     0.412831     0.706415      0    354    599    593    183      0      0      0      0     57   2590    125   1729     2.350000     2.090470     2.212429     0.028918     0.106215     0.738691     0.723446    73.600000     0.029894     0.007145     0.014070     0.005777     0.000000     0.000000     0.000000     0.014070     0.008781     0.145000     0.506993     0.371760     0.398971 
    0.500000     0.000704     0.410366     0.705391      0    343    591    612    181      0      0      0      0     70   2585    126   1727     2.365000     2.036332     2.198622     0.035514     0.099311     0.745459     0.725172    77.700000     0.031560     0.007543     0.013395     0.006016     1.238000     0.039491     0.009438     0.013395     0.008809     0.141000     0.493007     0.361505     0.395154 
    0.500000     0.005762     0.407431     0.705423      0    324    622    544    214      0      0      0      0     89   2553    142   1704     2.380000     2.356038     2.327744     0.045153     0.163872     0.705495     0.709032    73.700000     0.029935     0.007154     0.020482     0.006443     0.000000     0.000000     0.000000     0.020482     0.010418     0.111000     0.388112     0.284589     0.429598 
    0.500000     0.003137     0.402119     0.701998      0    326    603    576    212      0      0      0      0     97   2592    160   1717     2.393000     2.292535     2.322674     0.049212     0.161337     0.713433     0.709666   110.000000     0.044679     0.010678     0.020171     0.007717     1.739000     0.055472     0.013258     0.020171     0.011511     0.149000     0.520979     0.382016     0.428296 
    0.500000     0.006146     0.410294     0.706959      0    371    565    571    201      0      0      0      0     69   2554    127   1708     2.352000     2.245796     2.257148     0.035006     0.128574     0.719276     0.717856    74.300000     0.030179     0.007213     0.016391     0.005018     0.000000     0.000000     0.000000     0.016391     0.008642     0.149000     0.520979     0.382016     0.411107 
