# Supplementary material
Source: publisher figshare collection journal article supplement (https://frontiersin.figshare.com/ndownloader/files/13649807)
Supplement: Supplementary file 1 [file 13649807 › SupplementaryData-dia-RVE6-A20.dat]

   z_x/z_bcc     zeta_ini         zeta     zeta_tot    N_0    N_1    N_2    N_3    N_4    N_5    N_6    N_7    N_8      g  N_J,t  g^(i) N_J,t^(i)     z_avg        z_avg        z_avg         g_V*         g_V*     zeta_tot     zeta_tot            E         E/E0     E/E0,bcc     E/E0,bcc     E/E0,bcc           sy       sy/sy0   sy/sy0,bcc   sy/sy0,bcc   sy/sy0,bcc           nu       nu/nu0   nu/nu0,bcc   nu/nu0,bcc
         [-]          [-]          [-]          [-]    [-]    [-]    [-]    [-]    [-]    [-]    [-]    [-]    [-]    [-]    [-]    [-]    [-]          [-]          [-]          [-]          [-]          [-]          [-]          [-]        [MPa]          [-]          [-]          [-]          [-]        [MPa]          [-]          [-]          [-]          [-]          [-]          [-]          [-]          [-]
         RVE          RVE          RVE          RVE    RVE    RVE    RVE    RVE    RVE    RVE    RVE    RVE    RVE    RVE    RVE    RVE    RVE          RVE         ANN3       ANN3gi          RVE       ANN3gi         ANN3       ANN3gi          RVE          RVE          RVE           MC      MC+ANN3          RVE          RVE          RVE           MC      MC+ANN3          RVE          RVE          RVE           MC
    0.500000     0.000000     0.000000     0.500000      0      0      0      0   1710      0      0      0      0   1310   2571   1310   1710     4.000000     3.981662     3.997159     0.669522     0.998579     0.502292     0.500355  2061.500000     1.000000     0.239000     0.238504     0.223631    25.136000     1.000000     0.239000     0.238504     0.225573     0.175000     1.000000     0.733265     0.732889 
    0.500000    -0.002943     0.000000     0.498529      0      0      0      0   1734      0      0      0      0   1329   2612   1323   1734     4.000000     3.981662     3.992749     0.679232     0.996375     0.502292     0.500906  2090.600000     1.014116     0.242373     0.237735     0.222863    25.673000     1.021364     0.244106     0.237735     0.224804     0.184000     1.051429     0.770976     0.732305 
    0.500000    -0.004385     0.000000     0.497807      0      0      0      0   1726      0      0      0      0   1320   2598   1320   1726     4.000000     3.981662     3.995301     0.674632     0.997650     0.502292     0.500587  2059.800000     0.999175     0.238803     0.238180     0.223308    25.633000     1.019772     0.243725     0.238180     0.225249     0.179000     1.022857     0.750025     0.732643 
    0.500000    -0.007328     0.000000     0.496336      0      0      0      0   1730      0      0      0      0   1328   2595   1328   1730     4.000000     3.981662     3.999360     0.678721     0.999680     0.502292     0.500080  2097.400000     1.017415     0.243162     0.238888     0.224015    25.712000     1.022915     0.244476     0.238888     0.225957     0.176000     1.005714     0.737455     0.733180 
    0.500000    -0.003347     0.000000     0.498327      0      0      0      0   1723      0      0      0      0   1326   2602   1322   1723     4.000000     3.981662     3.998842     0.677699     0.999421     0.502292     0.500145  2047.600000     0.993257     0.237388     0.238798     0.223925    25.522000     1.015356     0.242670     0.238798     0.225867     0.184000     1.051429     0.770976     0.733112 
    0.500000     0.000000     0.100519     0.550260      0      6     87    496   1121      0      0      0      0   1010   2571   1019   1710     3.598000     3.621219     3.636665     0.516196     0.818333     0.547348     0.545417  1271.100000     0.616590     0.147365     0.177608     0.155552     0.000000     0.000000     0.000000     0.177608     0.150528     0.164000     0.937143     0.687174     0.682278 
    0.500000    -0.004385     0.099391     0.547721      0      5     85    496   1140      0      0      0      0   1020   2598   1025   1726     3.605000     3.625017     3.633673     0.521307     0.816837     0.546873     0.545791  1310.100000     0.635508     0.151886     0.177122     0.154975    16.445000     0.654241     0.156363     0.177122     0.150040     0.176000     1.005714     0.737455     0.681832 
    0.500000    -0.007328     0.102309     0.547865      0      5     98    481   1146      0      0      0      0   1025   2595   1029   1730     3.600000     3.632842     3.647254     0.523862     0.823627     0.545895     0.544093  1326.800000     0.643609     0.153822     0.179332     0.156989    16.725000     0.665380     0.159026     0.179332     0.152260     0.173000     0.988571     0.724885     0.683852 
    0.500000    -0.003347     0.103175     0.550087      0      7     85    516   1115      0      0      0      0   1008   2602   1009   1723     3.590000     3.610564     3.613137     0.515174     0.806568     0.548679     0.548358  1279.500000     0.620665     0.148339     0.173794     0.151976    16.434000     0.653803     0.156259     0.173794     0.146735     0.180000     1.028571     0.754215     0.678760 
    0.500000     0.000000     0.198269     0.599134      0     50    282    659    719      0      0      0      0    701   2571    729   1710     3.197000     3.227322     3.306925     0.358271     0.653462     0.596585     0.586634   692.700000     0.336017     0.080308     0.126491     0.106115     8.595000     0.341940     0.081724     0.126491     0.102761     0.162000     0.925714     0.678794     0.630294 
    0.500000    -0.002943     0.207525     0.602597      0     46    296    705    687      0      0      0      0    687   2612    701   1734     3.172000     3.108310     3.222584     0.351116     0.611292     0.611461     0.597177   706.100000     0.342518     0.081862     0.114350     0.093776     9.371000     0.372812     0.089102     0.114350     0.091474     0.172000     0.982857     0.720695     0.616000 
    0.500000    -0.004385     0.204297     0.600404      0     45    268    722    691      0      0      0      0    708   2598    727   1726     3.193000     3.088589     3.231196     0.361848     0.615598     0.613926     0.596100   661.800000     0.321028     0.076726     0.115570     0.094961     8.651000     0.344168     0.082256     0.115570     0.092831     0.163000     0.931429     0.682984     0.617480 
    0.500000    -0.007271     0.208352     0.601298      0     52    285    705    688      0      0      0      0    699   2595    709   1730     3.173000     3.109896     3.231294     0.357249     0.615647     0.611263     0.596088   706.300000     0.342615     0.081885     0.115584     0.095013     0.000000     0.000000     0.000000     0.115584     0.092696     0.160000     0.914286     0.670414     0.617496 
    0.500000    -0.003347     0.203186     0.600260      0     52    272    696    703      0      0      0      0    697   2602    716   1723     3.190000     3.147129     3.250134     0.356226     0.625067     0.606609     0.593733   699.600000     0.339365     0.081108     0.118268     0.097763     9.069000     0.360797     0.086230     0.118268     0.095119     0.167000     0.954286     0.699744     0.620717 
    0.500000    -0.000058     0.307945     0.653953      0    148    472    717    373      0      0      0      0    376   2571    423   1710     2.769000     2.557843     2.734048     0.192168     0.367024     0.680270     0.658244   267.600000     0.129808     0.031024     0.054076     0.034923     0.000000     0.000000     0.000000     0.054076     0.038276     0.130000     0.742857     0.544711     0.523442 
    0.500000    -0.002943     0.309016     0.653491      0    159    477    704    394      0      0      0      0    380   2612    421   1734     2.769000     2.603774     2.764246     0.194212     0.382123     0.674528     0.654469   320.600000     0.155518     0.037169     0.057226     0.037315     0.000000     0.000000     0.000000     0.057226     0.040158     0.154000     0.880000     0.645273     0.529718 
    0.500000    -0.004443     0.312633     0.654789      0    152    488    706    380      0      0      0      0    369   2598    419   1726     2.761000     2.579116     2.747796     0.188590     0.373898     0.677611     0.656525   278.400000     0.135047     0.032276     0.055500     0.035963     4.058000     0.161442     0.038585     0.055500     0.039092     0.145000     0.828571     0.607562     0.526310 
    0.500000    -0.007328     0.303489     0.649192      0    153    456    727    394      0      0      0      0    406   2595    448   1730     2.787000     2.583424     2.771874     0.207501     0.385937     0.677072     0.653516   321.200000     0.155809     0.037238     0.058035     0.038427     4.586000     0.182447     0.043605     0.058035     0.041508     0.146000     0.834286     0.611752     0.531290 
    0.500000    -0.003405     0.303583     0.650606      0    147    474    700    402      0      0      0      0    398   2602    434   1723     2.788000     2.620435     2.793010     0.203412     0.396505     0.672446     0.650874   320.900000     0.155663     0.037203     0.060304     0.040182     0.000000     0.000000     0.000000     0.060304     0.042823     0.163000     0.931429     0.682984     0.535618 
    0.500000    -0.000058     0.399573     0.699769      0    314    591    610    195      0      0      0      0    112   2571    165   1710     2.401000     2.134198     2.279571     0.057242     0.139786     0.733225     0.715054    89.100000     0.043221     0.010330     0.017634     0.008548     1.530000     0.060869     0.014548     0.017634     0.011727     0.191000     1.091429     0.800306     0.417065 
    0.500000    -0.002943     0.409930     0.704097      0    329    642    567    196      0      0      0      0     85   2612    155   1734     2.363000     2.225811     2.301109     0.043442     0.150555     0.721774     0.712361    85.400000     0.041426     0.009901     0.018877     0.007943     0.000000     0.000000     0.000000     0.018877     0.011490     0.165000     0.942857     0.691364     0.422713 
    0.500000    -0.004443     0.398058     0.697692      0    326    600    600    200      0      0      0      0     77   2598    141   1726     2.390000     2.184265     2.254342     0.039354     0.127171     0.726967     0.718207    81.100000     0.039340     0.009402     0.016240     0.006176     0.000000     0.000000     0.000000     0.016240     0.009557     0.141000     0.805714     0.590802     0.410355 
    0.500000    -0.007328     0.411296     0.703491      0    332    641    562    195      0      0      0      0     62   2595    134   1730     2.358000     2.229972     2.268260     0.031687     0.134130     0.721253     0.716468    72.800000     0.035314     0.008440     0.017001     0.005976     0.000000     0.000000     0.000000     0.017001     0.009539     0.146000     0.834286     0.611752     0.414070 
    0.500000    -0.003347     0.406890     0.702452      0    340    628    541    214      0      0      0      0     82   2602    129   1723     2.365000     2.360978     2.309001     0.041909     0.154501     0.704878     0.711375    67.000000     0.032501     0.007768     0.019345     0.005178     0.000000     0.000000     0.000000     0.019345     0.009163     0.104000     0.594286     0.435769     0.424764 
