# Supplementary material
Source: publisher figshare collection journal article supplement (https://frontiersin.figshare.com/ndownloader/files/13649807)
Supplement: Supplementary file 1 [file 13649807 › SupplementaryData-dia-RVE6-A30.dat]

   z_x/z_bcc     zeta_ini         zeta     zeta_tot    N_0    N_1    N_2    N_3    N_4    N_5    N_6    N_7    N_8      g  N_J,t  g^(i) N_J,t^(i)     z_avg        z_avg        z_avg         g_V*         g_V*     zeta_tot     zeta_tot            E         E/E0     E/E0,bcc     E/E0,bcc     E/E0,bcc           sy       sy/sy0   sy/sy0,bcc   sy/sy0,bcc   sy/sy0,bcc           nu       nu/nu0   nu/nu0,bcc   nu/nu0,bcc
         [-]          [-]          [-]          [-]    [-]    [-]    [-]    [-]    [-]    [-]    [-]    [-]    [-]    [-]    [-]    [-]    [-]          [-]          [-]          [-]          [-]          [-]          [-]          [-]        [MPa]          [-]          [-]          [-]          [-]        [MPa]          [-]          [-]          [-]          [-]          [-]          [-]          [-]          [-]
         RVE          RVE          RVE          RVE    RVE    RVE    RVE    RVE    RVE    RVE    RVE    RVE    RVE    RVE    RVE    RVE    RVE          RVE         ANN3       ANN3gi          RVE       ANN3gi         ANN3       ANN3gi          RVE          RVE          RVE           MC      MC+ANN3          RVE          RVE          RVE           MC      MC+ANN3          RVE          RVE          RVE           MC
    0.500000     0.000000     0.000000     0.500000      0      0      0      0   1730      0      0      0      0   1263   2748   1264   1730     4.000000     3.981662     3.947406     0.603924     0.973703     0.502292     0.506574  1396.200000     1.000000     0.239000     0.229861     0.214988    18.974000     1.000000     0.239000     0.229861     0.216929     0.074000     1.000000     0.733265     0.726254 
    0.500000    -0.001481     0.000000     0.499259      0      0      0      0   1744      0      0      0      0   1261   2785   1278   1744     4.000000     3.981662     3.950405     0.602967     0.975203     0.502292     0.506199  1514.400000     1.084658     0.259233     0.230380     0.215507    19.327000     1.018604     0.243446     0.230380     0.217449     0.080000     1.081081     0.792719     0.726657 
    0.500000    -0.001827     0.000000     0.499087      0      0      0      0   1727      0      0      0      0   1246   2758   1254   1727     4.000000     3.981662     3.941151     0.595795     0.970576     0.502292     0.507356  1465.400000     1.049563     0.250845     0.228779     0.213906     0.000000     0.000000     0.000000     0.228779     0.215848     0.047000     0.635135     0.465722     0.725412 
    0.500000     0.013774     0.000000     0.506887      0      0      0      0   1725      0      0      0      0   1239   2773   1254   1725     4.000000     3.981662     3.942314     0.592448     0.971157     0.502292     0.507211  1429.600000     1.023922     0.244717     0.228980     0.214107    18.921000     0.997207     0.238332     0.228980     0.216049     0.077000     1.040541     0.762992     0.725568 
    0.500000     0.000000     0.103031     0.551516      0      5     83    505   1137      0      0      0      0    973   2748    985   1730     3.603000     3.620344     3.592001     0.465255     0.796000     0.547457     0.551000   898.900000     0.643819     0.153873     0.170387     0.148352    12.381000     0.652525     0.155953     0.170387     0.143307     0.087000     1.175676     0.862082     0.675576 
    0.500000    -0.001530     0.103515     0.551071      0      7     87    517   1133      0      0      0      0    954   2785    977   1744     3.592000     3.613990     3.576785     0.456170     0.788392     0.548251     0.552902   910.700000     0.652270     0.155892     0.167946     0.146055    11.997000     0.632286     0.151116     0.167946     0.140878     0.090000     1.216216     0.891809     0.673270 
    0.500000    -0.001827     0.106342     0.552355      0      6     98    508   1115      0      0      0      0    927   2758    946   1727     3.582000     3.614361     3.563773     0.443260     0.781887     0.548205     0.554528   886.000000     0.634580     0.151664     0.165867     0.143967     0.000000     0.000000     0.000000     0.165867     0.138797     0.067000     0.905405     0.663902     0.671288 
    0.500000     0.013774     0.099314     0.555860      0      7     79    507   1132      0      0      0      0    941   2773    963   1725     3.602000     3.618406     3.573067     0.449954     0.786533     0.547699     0.553367   887.800000     0.635869     0.151972     0.167351     0.145361    11.862000     0.625171     0.149416     0.167351     0.140274     0.095000     1.283784     0.941354     0.672705 
    0.500000     0.000000     0.204927     0.602463      0     52    258    725    695      0      0      0      0    656   2748    687   1730     3.192000     3.090372     3.185917     0.313677     0.592958     0.613703     0.601760   491.300000     0.351884     0.084100     0.109210     0.088604     7.352000     0.387478     0.092607     0.109210     0.086459     0.080000     1.081081     0.792719     0.609647 
    0.500000    -0.001481     0.200927     0.599872      0     36    294    713    701      0      0      0      0    659   2785    699   1744     3.192000     3.117992     3.212612     0.315111     0.606306     0.610251     0.598424   555.400000     0.397794     0.095073     0.112943     0.092387     0.000000     0.000000     0.000000     0.112943     0.090000     0.094000     1.270270     0.931445     0.614281 
    0.500000    -0.001827     0.201202     0.599872      0     45    272    700    710      0      0      0      0    643   2758    685   1727     3.202000     3.151600     3.213281     0.307461     0.606641     0.606050     0.598340   481.500000     0.344865     0.082423     0.113038     0.092540     0.000000     0.000000     0.000000     0.113038     0.089857     0.090000     1.216216     0.891809     0.614396 
    0.500000     0.000000     0.307218     0.653609      0    168    463    705    394      0      0      0      0    327   2748    392   1730     2.766000     2.602868     2.724533     0.156360     0.362267     0.674642     0.659433   189.200000     0.135511     0.032387     0.053101     0.033203     3.167000     0.166913     0.039892     0.053101     0.036057     0.104000     1.405405     1.030534     0.521448 
    0.500000    -0.001481     0.300651     0.649807      0    142    485    715    402      0      0      0      0    350   2785    425   1744     2.790000     2.606718     2.762301     0.167358     0.381150     0.674160     0.654712   233.400000     0.167168     0.039953     0.057020     0.037070     0.000000     0.000000     0.000000     0.057020     0.039878     0.097000     1.310811     0.961172     0.529316 
    0.500000    -0.001827     0.302124     0.650425      0    153    457    717    400      0      0      0      0    345   2758    396   1727     2.790000     2.601742     2.720491     0.164967     0.360245     0.674782     0.659939   195.800000     0.140238     0.033517     0.052690     0.032807     0.000000     0.000000     0.000000     0.052690     0.035675     0.088000     1.189189     0.871991     0.520598 
    0.500000     0.013823     0.306818     0.658200      0    166    459    699    401      0      0      0      0    330   2773    389   1725     2.774000     2.619742     2.733866     0.157795     0.366933     0.672532     0.658267   225.500000     0.161510     0.038601     0.054058     0.033944     3.376000     0.177928     0.042525     0.054058     0.036594     0.091000     1.229730     0.901718     0.523404 
    0.500000     0.000000     0.406892     0.703446      0    350    608    587    185      0      0      0      0     16   2748    113   1730     2.351000     2.116721     2.199561     0.007651     0.099780     0.735410     0.725055    35.000000     0.025068     0.005991     0.013440     0.004677     0.000000     0.000000     0.000000     0.013440     0.007786     0.123000     1.662162     1.218805     0.395414 
    0.500000    -0.001777     0.404297     0.701619      0    355    602    547    223      0      0      0      0     15   2758    102   1727     2.369000     2.387045     2.274165     0.007172     0.137082     0.701619     0.715729    50.200000     0.035955     0.008593     0.017330     0.002475     0.000000     0.000000     0.000000     0.017330     0.006502     0.109000     1.472973     1.080079     0.415636 
    0.500000     0.013774     0.403714     0.705964      0    327    635    544    219      0      0      0      0     37   2773    119   1725     2.380000     2.376334     2.297608     0.017692     0.148804     0.702958     0.712799    48.800000     0.034952     0.008354     0.018672     0.004101     0.000000     0.000000     0.000000     0.018672     0.008114     0.101000     1.364865     1.000807     0.421800 
