# Supplementary material
Source: publisher figshare collection journal article supplement (https://frontiersin.figshare.com/ndownloader/files/13649807)
Supplement: Supplementary file 1 [file 13649807 › SupplementaryData-dia-RVE6-CUT10.dat]

   z_x/z_bcc     zeta_ini         zeta     zeta_tot    N_0    N_1    N_2    N_3    N_4    N_5    N_6    N_7    N_8      g  N_J,t  g^(i) N_J,t^(i)     z_avg        z_avg        z_avg         g_V*         g_V*     zeta_tot     zeta_tot            E         E/E0     E/E0,bcc     E/E0,bcc     E/E0,bcc           sy       sy/sy0   sy/sy0,bcc   sy/sy0,bcc   sy/sy0,bcc           nu       nu/nu0   nu/nu0,bcc   nu/nu0,bcc
         [-]          [-]          [-]          [-]    [-]    [-]    [-]    [-]    [-]    [-]    [-]    [-]    [-]    [-]    [-]    [-]    [-]          [-]          [-]          [-]          [-]          [-]          [-]          [-]        [MPa]          [-]          [-]          [-]          [-]        [MPa]          [-]          [-]          [-]          [-]          [-]          [-]          [-]          [-]
         RVE          RVE          RVE          RVE    RVE    RVE    RVE    RVE    RVE    RVE    RVE    RVE    RVE    RVE    RVE    RVE    RVE          RVE         ANN3       ANN3gi          RVE       ANN3gi         ANN3       ANN3gi          RVE          RVE          RVE           MC      MC+ANN3          RVE          RVE          RVE           MC      MC+ANN3          RVE          RVE          RVE           MC
    0.500000     0.105045     0.000000     0.552523      9      0    118    436    967      0      0      0      0   1141   1962    808   1530     3.537000     3.616841     3.555470     0.764156     0.777735     0.547895     0.555566   653.700000     0.651290     0.155658     0.164544     0.142589     9.685000     0.615859     0.147190     0.164544     0.137469     0.352000     0.852300     0.624962     0.670019 
    0.500000     0.105045     0.099231     0.596926     20      9    253    627    621      0      0      0      0    855   1962    601   1530     3.190000     3.125978     3.196886     0.572615     0.598443     0.609253     0.600389   406.200000     0.404703     0.096724     0.110738     0.090196     6.253000     0.397622     0.095031     0.110738     0.087739     0.300000     0.726392     0.532638     0.611556 
    0.500000     0.105045     0.099604     0.597093     22     16    263    577    652      0      0      0      0    857   1962    613   1530     3.190000     3.261716     3.275409     0.573954     0.637705     0.592286     0.590574   419.400000     0.417854     0.099867     0.121904     0.101574     6.444000     0.409767     0.097934     0.121904     0.097912     0.307000     0.743341     0.545066     0.625004 
    0.500000     0.105045     0.100575     0.597528     23     17    256    602    632      0      0      0      0    855   1962    602   1530     3.178000     3.187966     3.230545     0.572615     0.615272     0.601504     0.596182   412.900000     0.411378     0.098319     0.115477     0.095041     6.360000     0.404426     0.096658     0.115477     0.092036     0.290000     0.702179     0.514883     0.617368 
    0.500000     0.105045     0.100202     0.597361     22     23    239    620    626      0      0      0      0    853   1962    598   1530     3.180000     3.146725     3.202718     0.571275     0.601359     0.606659     0.599660   412.300000     0.410780     0.098176     0.111554     0.091049     6.475000     0.411739     0.098405     0.111554     0.088408     0.294000     0.711864     0.521985     0.612569 
    0.500000     0.105045     0.099231     0.596926     20     12    270    589    639      0      0      0      0    856   1962    609   1530     3.186000     3.221635     3.255562     0.573284     0.627781     0.597296     0.593055   418.200000     0.416658     0.099581     0.119046     0.098661     6.302000     0.400738     0.095776     0.119046     0.095358     0.303000     0.733656     0.537964     0.621641 
    0.500000     0.105045     0.199134     0.641630     33     65    424    613    395      0      0      0      0    585   1962    401   1530     2.831000     2.701144     2.859770     0.391789     0.429885     0.662357     0.642529   208.400000     0.207632     0.049624     0.067733     0.046988     3.505000     0.222879     0.053268     0.067733     0.048635     0.239000     0.578692     0.424335     0.549038 
    0.500000     0.105045     0.198537     0.641363     35     68    423    601    403      0      0      0      0    577   1962    401   1530     2.829000     2.732345     2.883356     0.386431     0.441678     0.658457     0.639580   216.900000     0.216100     0.051648     0.070451     0.049593     3.614000     0.229811     0.054925     0.070451     0.050875     0.243000     0.588378     0.431437     0.553690 
    0.500000     0.105045     0.200478     0.642232     38     62    410    630    390      0      0      0      0    583   1962    408   1530     2.831000     2.671599     2.841635     0.390450     0.420818     0.666050     0.644796   223.900000     0.223075     0.053315     0.065676     0.045094     3.696000     0.235025     0.056171     0.065676     0.047100     0.270000     0.653753     0.479374     0.545430 
    0.500000     0.105045     0.202419     0.643101     47     66    401    623    393      0      0      0      0    586   1962    407   1530     2.816000     2.685259     2.852514     0.392459     0.426257     0.664343     0.643436   227.000000     0.226163     0.054053     0.066907     0.046241     3.860000     0.245453     0.058663     0.066907     0.048080     0.249000     0.602906     0.442089     0.547597 
    0.500000     0.105045     0.199507     0.641798     36     69    408    622    395      0      0      0      0    586   1962    405   1530     2.831000     2.690198     2.852602     0.392459     0.426301     0.663725     0.643425   214.600000     0.213809     0.051100     0.066917     0.046224     3.630000     0.230828     0.055168     0.066917     0.048004     0.249000     0.602906     0.442089     0.547615 
    0.500000     0.105045     0.300007     0.686769     68    168    507    548    239      0      0      0      0    331   1962    215   1530     2.472000     2.440365     2.485755     0.221679     0.242878     0.694954     0.689281   108.200000     0.107801     0.025764     0.031537     0.015243     1.998000     0.127051     0.030365     0.031537     0.019266     0.209000     0.506053     0.371071     0.468399 
    0.500000     0.105045     0.300679     0.687070     71    153    523    562    221      0      0      0      0    322   1962    225   1530     2.463000     2.355709     2.462424     0.215651     0.231212     0.705536     0.692197   101.600000     0.101225     0.024193     0.029740     0.015710     2.043000     0.129912     0.031049     0.029740     0.019684     0.251000     0.607748     0.445640     0.462875 
    0.500000     0.105045     0.298439     0.686067     63    135    543    572    217      0      0      0      0    335   1962    225   1530     2.487000     2.322367     2.445730     0.224358     0.222865     0.709704     0.694284   110.200000     0.109794     0.026241     0.028489     0.015307     2.147000     0.136525     0.032630     0.028489     0.019196     0.227000     0.549637     0.403029     0.458881 
    0.500000     0.105045     0.297469     0.685633     58    150    535    569    218      0      0      0      0    330   1962    222   1530     2.483000     2.331739     2.445047     0.221009     0.222524     0.708533     0.694369    91.000000     0.090665     0.021669     0.028439     0.015021     1.844000     0.117258     0.028025     0.028439     0.018937     0.220000     0.532688     0.390601     0.458717 
    0.500000     0.105045     0.297469     0.685633     62    146    527    570    225      0      0      0      0    339   1962    233   1530     2.490000     2.359114     2.471999     0.227037     0.235999     0.705111     0.691000   100.000000     0.099631     0.023812     0.030471     0.016352     1.929000     0.122663     0.029316     0.030471     0.020334     0.220000     0.532688     0.390601     0.465150 
    0.500000     0.105045     0.399910     0.731473    107    267    602    444    110      0      0      0      0     92   1962     51   1530     2.120000     1.810045     2.078756     0.061615     0.039378     0.773744     0.740155    34.800000     0.034672     0.008287     0.008344     0.004116     0.878000     0.055831     0.013344     0.008344     0.006097     0.208000     0.503632     0.369296     0.360453 
    0.500000     0.105045     0.396401     0.729903     96    276    601    430    127      0      0      0      0     97   1962     57   1530     2.141000     2.034578     2.127742     0.064963     0.063871     0.745678     0.734032    36.400000     0.036266     0.008668     0.010235     0.002884     0.904000     0.057484     0.013739     0.010235     0.005670     0.244000     0.590799     0.433212     0.374990 
    0.500000     0.105045     0.400582     0.731774    118    261    599    442    110      0      0      0      0     94   1962     53   1530     2.108000     1.815557     2.084329     0.062954     0.042164     0.773055     0.739459    35.300000     0.035170     0.008406     0.008547     0.004253     0.818000     0.052016     0.012432     0.008547     0.006253     0.230000     0.556901     0.408356     0.362133 
    0.500000     0.105045     0.400582     0.731774    118    262    598    419    133      0      0      0      0    101   1962     47   1530     2.122000     2.125539     2.126905     0.067642     0.063453     0.734308     0.734137    30.700000     0.030587     0.007310     0.010201     0.001276     0.754000     0.047946     0.011459     0.010201     0.004420     0.192000     0.464891     0.340888     0.374746 
    0.500000     0.105045     0.400284     0.731640    102    280    589    437    122      0      0      0      0     95   1962     51   1530     2.129000     1.961660     2.100919     0.063624     0.050460     0.754793     0.737385    32.900000     0.032779     0.007834     0.009170     0.002939     0.813000     0.051698     0.012356     0.009170     0.005452     0.216000     0.523002     0.383499     0.367095 
