# Supplementary material
Source: publisher figshare collection journal article supplement (https://frontiersin.figshare.com/ndownloader/files/13649807)
Supplement: Supplementary file 1 [file 13649807 › SupplementaryData-dia-RVE6-CUT20.dat]

   z_x/z_bcc     zeta_ini         zeta     zeta_tot    N_0    N_1    N_2    N_3    N_4    N_5    N_6    N_7    N_8      g  N_J,t  g^(i) N_J,t^(i)     z_avg        z_avg        z_avg         g_V*         g_V*     zeta_tot     zeta_tot            E         E/E0     E/E0,bcc     E/E0,bcc     E/E0,bcc           sy       sy/sy0   sy/sy0,bcc   sy/sy0,bcc   sy/sy0,bcc           nu       nu/nu0   nu/nu0,bcc   nu/nu0,bcc
         [-]          [-]          [-]          [-]    [-]    [-]    [-]    [-]    [-]    [-]    [-]    [-]    [-]    [-]    [-]    [-]    [-]          [-]          [-]          [-]          [-]          [-]          [-]          [-]        [MPa]          [-]          [-]          [-]          [-]        [MPa]          [-]          [-]          [-]          [-]          [-]          [-]          [-]          [-]
         RVE          RVE          RVE          RVE    RVE    RVE    RVE    RVE    RVE    RVE    RVE    RVE    RVE    RVE    RVE    RVE    RVE          RVE         ANN3       ANN3gi          RVE       ANN3gi         ANN3       ANN3gi          RVE          RVE          RVE           MC      MC+ANN3          RVE          RVE          RVE           MC      MC+ANN3          RVE          RVE          RVE           MC
    0.500000     0.209222     0.000000     0.604611     16      0    362    626    526      0      0      0      0    788   1962    480   1530     3.076000     2.946359     3.025886     0.527743     0.512943     0.631705     0.621764   337.200000     0.335957     0.080294     0.087849     0.066998     5.250000     0.333842     0.079788     0.087849     0.066130     0.285000     0.690073     0.506006     0.580873 
    0.500000     0.209222     0.096924     0.642934     44     17    510    615    344      0      0      0      0    563   1962    348   1530     2.783000     2.603421     2.733933     0.377055     0.366967     0.674572     0.658258   191.100000     0.190396     0.045504     0.054064     0.034158     3.164000     0.201195     0.048086     0.054064     0.037006     0.221000     0.535109     0.392377     0.523419 
    0.500000     0.209222     0.103515     0.645540     64     13    503    612    338      0      0      0      0    565   1962    322   1530     2.750000     2.595337     2.692945     0.378394     0.346473     0.675583     0.663382   182.900000     0.182226     0.043552     0.049927     0.030135     3.105000     0.197444     0.047189     0.049927     0.033079     0.234000     0.566586     0.415458     0.514765 
    0.500000     0.209222     0.102079     0.644972     59     12    505    608    346      0      0      0      0    572   1962    354   1530     2.765000     2.614512     2.754831     0.383083     0.377415     0.673186     0.655646   197.300000     0.196573     0.046981     0.056235     0.036184     3.381000     0.214994     0.051384     0.056235     0.038898     0.247000     0.598063     0.438539     0.527770 
    0.500000     0.209222     0.098023     0.643368     48     13    506    631    332      0      0      0      0    565   1962    337   1530     2.775000     2.564912     2.683782     0.378394     0.341891     0.679386     0.664527   193.600000     0.192886     0.046100     0.049024     0.029737     3.200000     0.203485     0.048633     0.049024     0.033018     0.242000     0.585956     0.429661     0.512809 
    0.500000     0.209222     0.100980     0.644537     56     13    502    621    338      0      0      0      0    571   1962    334   1530     2.766000     2.586121     2.698711     0.382413     0.349355     0.676735     0.662661   187.600000     0.186908     0.044671     0.050499     0.030848     3.102000     0.197253     0.047143     0.050499     0.033898     0.228000     0.552058     0.404805     0.515992 
    0.500000     0.209222     0.198327     0.683027     92     68    634    522    214      0      0      0      0    356   1962    184   1530     2.456000     2.391712     2.427440     0.238422     0.213720     0.701036     0.696570    76.600000     0.076318     0.018240     0.027152     0.012172     1.527000     0.097100     0.023207     0.027152     0.016204     0.159000     0.384988     0.282298     0.454464 
    0.500000     0.209222     0.200524     0.683896     94     70    625    525    216      0      0      0      0    351   1962    210   1530     2.457000     2.394672     2.474983     0.235073     0.237492     0.700666     0.690627    94.400000     0.094052     0.022478     0.030700     0.015641     1.703000     0.108292     0.025882     0.030700     0.019676     0.231000     0.559322     0.410131     0.465857 
    0.500000     0.209222     0.195369     0.681858     84     68    606    569    203      0      0      0      0    361   1962    212   1530     2.483000     2.260210     2.409132     0.241771     0.204566     0.717474     0.698859    94.500000     0.094152     0.022502     0.025849     0.014150     1.981000     0.125970     0.030107     0.025849     0.017829     0.194000     0.469734     0.344439     0.450000 
    0.500000     0.209222     0.203059     0.684898    106     65    591    559    209      0      0      0      0    355   1962    212   1530     2.458000     2.308205     2.427541     0.237752     0.213771     0.711474     0.696557   100.200000     0.099831     0.023859     0.027159     0.014326     1.946000     0.123744     0.029575     0.027159     0.018172     0.238000     0.576271     0.422559     0.454489 
    0.500000     0.209222     0.197566     0.682726     85     64    622    540    219      0      0      0      0    367   1962    212   1530     2.486000     2.382638     2.463387     0.245789     0.231693     0.702170     0.692077    94.400000     0.094052     0.022478     0.029813     0.015076     1.744000     0.110899     0.026505     0.029813     0.019097     0.194000     0.469734     0.344439     0.463104 
    0.500000     0.209222     0.298547     0.722653    142    159    685    411    133      0      0      0      0    154   1962     76   1530     2.153000     2.149040     2.198893     0.103138     0.099446     0.731370     0.725138    29.100000     0.028993     0.006929     0.013408     0.004039     0.695000     0.044194     0.010562     0.013408     0.007278     0.135000     0.326877     0.239687     0.395229 
    0.500000     0.209222     0.301504     0.723822    153    146    692    407    132      0      0      0      0    151   1962     72   1530     2.143000     2.151733     2.191941     0.101128     0.095971     0.731033     0.726007    39.100000     0.038956     0.009310     0.013075     0.003655     0.963000     0.061236     0.014635     0.013075     0.006905     0.185000     0.447942     0.328460     0.393294 
    0.500000     0.209155     0.303338     0.724524    162    144    665    432    127      0      0      0      0    176   1962     78   1530     2.142000     2.028603     2.172535     0.117872     0.086267     0.746425     0.728433    41.600000     0.041447     0.009906     0.012173     0.004918     0.953000     0.060600     0.014483     0.012173     0.007681     0.186000     0.450363     0.330236     0.387845 
    0.500000     0.209222     0.294913     0.721216    132    170    662    436    130      0      0      0      0    150   1962     65   1530     2.171000     2.046767     2.145400     0.100459     0.072700     0.744154     0.731825    34.800000     0.034672     0.008287     0.010975     0.003425     0.807000     0.051316     0.012265     0.010975     0.006258     0.166000     0.401937     0.294726     0.380105 
    0.500000     0.209222     0.298547     0.722653    140    159    690    412    129      0      0      0      0    157   1962     62   1530     2.151000     2.108604     2.158310     0.105147     0.079155     0.736424     0.730211    35.900000     0.035768     0.008548     0.011535     0.002920     0.782000     0.049727     0.011885     0.011535     0.005996     0.199000     0.481840     0.353316     0.383806 
    0.500000     0.209155     0.395184     0.760842    198    275    665    321     71      0      0      0      0    -22   1962    -35   1530     1.864000     1.681613     1.860854    -0.014734    -0.069573     0.789798     0.767393    11.600000     0.011557     0.002762     0.002591    -0.000202     0.276000     0.017551     0.004195     0.002591     0.001333     0.169000     0.409201     0.300053     0.288173 
    0.500000     0.209222     0.399527     0.762579    216    272    655    303     84      0      0      0      0     -7   1962    -31   1530     1.848000     1.952573     1.911499    -0.004688    -0.044250     0.755928     0.761063    13.200000     0.013151     0.003143     0.003569    -0.002530     0.357000     0.022701     0.005426     0.003569    -0.000050     0.164000     0.397094     0.291175     0.306288 
    0.500000     0.209222     0.391499     0.759405    189    275    677    318     71      0      0      0      0    -17   1962    -28   1530     1.874000     1.691389     1.879642    -0.011385    -0.060179     0.788576     0.765045    12.600000     0.012554     0.003000     0.002931     0.000036     0.321000     0.020412     0.004878     0.002931     0.001605     0.173000     0.418886     0.307155     0.295004 
    0.500000     0.209222     0.397752     0.761878    205    259    681    320     65      0      0      0      0    -17   1962    -26   1530     1.857000     1.601395     1.873278    -0.011385    -0.063361     0.799826     0.765840     9.700000     0.009664     0.002310     0.002813     0.000826     0.275000     0.017487     0.004179     0.002813     0.002051     0.153000     0.370460     0.271645     0.292705 
    0.500000     0.209222     0.398090     0.762011    214    249    673    332     62      0      0      0      0     -4   1962    -26   1530     1.856000     1.538347     1.867949    -0.002679    -0.066025     0.807707     0.766506    17.900000     0.017834     0.004262     0.002717     0.001325     0.491000     0.031222     0.007462     0.002717     0.002259     0.143000     0.346247     0.253891     0.290769 
