# Supplementary material
Source: publisher figshare collection journal article supplement (https://frontiersin.figshare.com/ndownloader/files/13649807)
Supplement: Supplementary file 1 [file 13649807 › SupplementaryData-dia-RVE6-CUT30.dat]

   z_x/z_bcc     zeta_ini         zeta     zeta_tot    N_0    N_1    N_2    N_3    N_4    N_5    N_6    N_7    N_8      g  N_J,t  g^(i) N_J,t^(i)     z_avg        z_avg        z_avg         g_V*         g_V*     zeta_tot     zeta_tot            E         E/E0     E/E0,bcc     E/E0,bcc     E/E0,bcc           sy       sy/sy0   sy/sy0,bcc   sy/sy0,bcc   sy/sy0,bcc           nu       nu/nu0   nu/nu0,bcc   nu/nu0,bcc
         [-]          [-]          [-]          [-]    [-]    [-]    [-]    [-]    [-]    [-]    [-]    [-]    [-]    [-]    [-]    [-]    [-]          [-]          [-]          [-]          [-]          [-]          [-]          [-]        [MPa]          [-]          [-]          [-]          [-]        [MPa]          [-]          [-]          [-]          [-]          [-]          [-]          [-]          [-]
         RVE          RVE          RVE          RVE    RVE    RVE    RVE    RVE    RVE    RVE    RVE    RVE    RVE    RVE    RVE    RVE    RVE          RVE         ANN3       ANN3gi          RVE       ANN3gi         ANN3       ANN3gi          RVE          RVE          RVE           MC      MC+ANN3          RVE          RVE          RVE           MC      MC+ANN3          RVE          RVE          RVE           MC
    0.500000     0.331039     0.000000     0.665520     54      0    722    520    234      0      0      0      0    412   1962    173   1530     2.575000     2.463073     2.440943     0.275927     0.220472     0.692116     0.694882   111.800000     0.111388     0.026622     0.028136     0.011232     2.093000     0.133092     0.031809     0.028136     0.015204     0.178000     0.430993     0.316032     0.457729 
    0.500000     0.331039     0.095994     0.697628    117     15    796    451    151      0      0      0      0    274   1962    100   1530     2.329000     2.189423     2.242703     0.183505     0.121351     0.726322     0.719662    56.000000     0.055794     0.013335     0.015619     0.005450     1.203000     0.076498     0.018283     0.015619     0.008852     0.112000     0.271186     0.198851     0.407224 
    0.500000     0.331039     0.102487     0.699800    133     13    795    438    151      0      0      0      0    269   1962     90   1530     2.301000     2.222802     2.235303     0.180156     0.117652     0.722150     0.720587    47.600000     0.047425     0.011334     0.015231     0.004362     1.077000     0.068485     0.016368     0.015231     0.007897     0.185000     0.447942     0.328460     0.405221 
    0.500000     0.331039     0.105983     0.700969    140     15    781    443    151      0      0      0      0    274   1962     98   1530     2.294000     2.210000     2.246989     0.183505     0.123494     0.723750     0.719126    49.000000     0.048819     0.011668     0.015846     0.005249     1.046000     0.066514     0.015897     0.015846     0.008734     0.138000     0.334140     0.245013     0.408379 
    0.500000     0.330972     0.101678     0.699499    130     11    809    417    163      0      0      0      0    268   1962    106   1530     2.308000     2.350292     2.319327     0.179486     0.159664     0.706214     0.710084    48.400000     0.048222     0.011525     0.019967     0.006077     1.120000     0.071220     0.017021     0.019967     0.010039     0.138000     0.334140     0.245013     0.427434 
    0.500000     0.331039     0.094696     0.697193    114     17    796    447    156      0      0      0      0    271   1962    103   1530     2.336000     2.236377     2.262248     0.181495     0.131124     0.720453     0.717219    48.700000     0.048520     0.011596     0.016669     0.005504     1.110000     0.070584     0.016869     0.016669     0.009092     0.153000     0.370460     0.271645     0.412469 
    0.500000     0.330972     0.194666     0.730605    189     62    818    367     94      0      0      0      0    141   1962     39   1530     2.075000     1.851208     2.075486     0.094431     0.037743     0.768599     0.740564    19.500000     0.019428     0.004643     0.008226     0.003492     0.468000     0.029760     0.007113     0.008226     0.005614     0.153000     0.370460     0.271645     0.359464 
    0.500000     0.331039     0.202377     0.733211    207     51    814    361     97      0      0      0      0    144   1962     45   1530     2.059000     1.912164     2.101230     0.096440     0.050615     0.760979     0.737346    27.400000     0.027299     0.006524     0.009182     0.003649     0.655000     0.041651     0.009955     0.009182     0.005984     0.160000     0.387409     0.284074     0.367187 
    0.500000     0.330972     0.199860     0.732342    200     51    836    340    103      0      0      0      0    145   1962     38   1530     2.062000     2.067060     2.114508     0.097110     0.057254     0.741617     0.735687    32.300000     0.032181     0.007691     0.009701     0.001812     0.806000     0.051253     0.012249     0.009701     0.004724     0.202000     0.489104     0.358643     0.371114 
    0.500000     0.330972     0.199860     0.732342    201     59    816    351    103      0      0      0      0    142   1962     42   1530     2.063000     2.026258     2.114278     0.095101     0.057139     0.746718     0.735715    26.900000     0.026801     0.006405     0.009692     0.002475     0.629000     0.039997     0.009559     0.009692     0.005229     0.164000     0.397094     0.291175     0.371046 
    0.500000     0.331039     0.191589     0.729602    181     53    836    369     91      0      0      0      0    140   1962     40   1530     2.089000     1.804462     2.071810     0.093761     0.035905     0.774442     0.741024    25.400000     0.025306     0.006048     0.008094     0.003934     0.691000     0.043940     0.010502     0.008094     0.005895     0.201000     0.486683     0.356867     0.358349 
    0.500000     0.331039     0.294976     0.764183    285    101    809    283     52      0      0      0      0     24   1962    -23   1530     1.814000     1.528099     1.864094     0.016073    -0.067953     0.808988     0.766988    10.200000     0.010162     0.002429     0.002648     0.001351     0.242000     0.015389     0.003678     0.002648     0.002231     0.142000     0.343826     0.252115     0.289361 
    0.500000     0.330972     0.306233     0.767925    297    117    778    291     47      0      0      0      0     24   1962    -27   1530     1.787000     1.467855     1.846547     0.016073    -0.076726     0.816518     0.769182     7.000000     0.006974     0.001667     0.002351     0.001594     0.208000     0.013227     0.003161     0.002351     0.002058     0.106000     0.256659     0.188199     0.282879 
    0.500000     0.331039     0.304465     0.767357    293    120    791    268     58      0      0      0      0     16   1962    -17   1530     1.790000     1.659618     1.896217     0.010716    -0.051891     0.792548     0.762973     8.600000     0.008568     0.002048     0.003253     0.000687     0.255000     0.016215     0.003875     0.003253     0.002140     0.165000     0.399516     0.292951     0.300920 
    0.500000     0.331039     0.305364     0.767658    294    111    794    277     54      0      0      0      0     21   1962    -13   1530     1.795000     1.568507     1.899474     0.014064    -0.050263     0.803937     0.762566     7.600000     0.007572     0.001810     0.003319     0.001646     0.202000     0.012845     0.003070     0.003319     0.002727     0.115000     0.278450     0.204178     0.302071 
    0.500000     0.331039     0.292378     0.763314    269    113    810    291     47      0      0      0      0     27   1962    -16   1530     1.826000     1.467855     1.881093     0.018083    -0.059454     0.816518     0.764863     9.800000     0.009764     0.002334     0.002958     0.002202     0.289000     0.018377     0.004392     0.002958     0.002666     0.175000     0.423729     0.310705     0.295525 
    0.500000     0.330972     0.394027     0.797294    372    183    752    185     38      0      0      0      0    -68   1962    -56   1530     1.565000     1.611001     1.703670    -0.045541    -0.148165     0.798625     0.787041     3.600000     0.003587     0.000857     0.000695    -0.001386     0.089000     0.005659     0.001353     0.000695    -0.000121     0.128000     0.309927     0.227259     0.224525 
    0.500000     0.331039     0.404855     0.800936    387    186    738    194     25      0      0      0      0    -84   1962    -69   1530     1.532000     1.440613     1.628206    -0.056257    -0.185897     0.819923     0.796474     3.100000     0.003089     0.000738     0.000273    -0.000299     0.085000     0.005405     0.001292     0.000273    -0.000418     0.181000     0.438257     0.321358     0.188066 
    0.500000     0.331039     0.411348     0.803107    409    165    750    184     22      0      0      0      0    -79   1962    -72   1530     1.507000     1.448141     1.601562    -0.052908    -0.199219     0.818982     0.799805     3.300000     0.003288     0.000786     0.000180    -0.000509     0.094000     0.005977     0.001429     0.000180    -0.000757     0.084000     0.203390     0.149139     0.173779 
    0.500000     0.331039     0.387074     0.794988    347    186    780    185     32      0      0      0      0    -88   1962    -73   1530     1.588000     1.495250     1.620460    -0.058936    -0.189770     0.813094     0.797443     2.900000     0.002889     0.000691     0.000243    -0.000756     0.072000     0.004578     0.001094     0.000243    -0.000076     0.165000     0.399516     0.292951     0.184003 
    0.500000     0.331039     0.402258     0.800067    383    180    755    185     27      0      0      0      0    -76   1962    -73   1530     1.538000     1.444867     1.606873    -0.050899    -0.196563     0.819392     0.799141     3.500000     0.003487     0.000833     0.000196    -0.000369     0.106000     0.006740     0.001611     0.000196    -0.000197     0.163000     0.394673     0.289400     0.176700 
