# Supplementary material
Source: publisher figshare collection journal article supplement (https://frontiersin.figshare.com/ndownloader/files/13649807)
Supplement: Supplementary file 1 [file 13649807 › SupplementaryData-dia-RVE6-CUT40.dat]

   z_x/z_bcc     zeta_ini         zeta     zeta_tot    N_0    N_1    N_2    N_3    N_4    N_5    N_6    N_7    N_8      g  N_J,t  g^(i) N_J,t^(i)     z_avg        z_avg        z_avg         g_V*         g_V*     zeta_tot     zeta_tot            E         E/E0     E/E0,bcc     E/E0,bcc     E/E0,bcc           sy       sy/sy0   sy/sy0,bcc   sy/sy0,bcc   sy/sy0,bcc           nu       nu/nu0   nu/nu0,bcc   nu/nu0,bcc
         [-]          [-]          [-]          [-]    [-]    [-]    [-]    [-]    [-]    [-]    [-]    [-]    [-]    [-]    [-]    [-]    [-]          [-]          [-]          [-]          [-]          [-]          [-]          [-]        [MPa]          [-]          [-]          [-]          [-]        [MPa]          [-]          [-]          [-]          [-]          [-]          [-]          [-]          [-]
         RVE          RVE          RVE          RVE    RVE    RVE    RVE    RVE    RVE    RVE    RVE    RVE    RVE    RVE    RVE    RVE    RVE          RVE         ANN3       ANN3gi          RVE       ANN3gi         ANN3       ANN3gi          RVE          RVE          RVE           MC      MC+ANN3          RVE          RVE          RVE           MC      MC+ANN3          RVE          RVE          RVE           MC
    0.500000     0.412897     0.000000     0.706448     92      0    982    338    118      0      0      0      0    182   1962     19   1530     2.255000     2.236753     2.107872     0.121890     0.053936     0.720406     0.736516    22.900000     0.022816     0.005453     0.009439    -0.001734     0.641000     0.040761     0.009742     0.009439     0.001856     0.087000     0.210654     0.154465     0.369156 
    0.500000     0.412964     0.100512     0.735984    192      7    974    281     76      0      0      0      0     99   1962     -7   1530     2.027000     1.920601     1.968094     0.066303    -0.015953     0.759925     0.753988    11.500000     0.011458     0.002738     0.004908    -0.000741     0.341000     0.021684     0.005182     0.004908     0.001624     0.181000     0.438257     0.321358     0.325500 
    0.500000     0.412964     0.096073     0.734681    183     12    969    290     76      0      0      0      0    107   1962     -9   1530     2.042000     1.880174     1.956103     0.071661    -0.021948     0.764978     0.755487    13.100000     0.013052     0.003119     0.004601    -0.000505     0.408000     0.025944     0.006201     0.004601     0.001718     0.110000     0.266344     0.195301     0.321512 
    0.500000     0.412897     0.102550     0.736552    198     13    961    278     80      0      0      0      0     99   1962    -13   1530     2.019000     2.000998     1.965182     0.066303    -0.017409     0.749875     0.754352    10.800000     0.010760     0.002572     0.004832    -0.001989     0.341000     0.021684     0.005182     0.004832     0.000670     0.116000     0.280872     0.205953     0.324535 
    0.500000     0.412897     0.103460     0.736819    198      5    968    285     74      0      0      0      0     98   1962     -3   1530     2.021000     1.868399     1.971689     0.065633    -0.014156     0.766450     0.753539    13.000000     0.012952     0.003096     0.005002     0.000049     0.343000     0.021811     0.005213     0.005002     0.002230     0.119000     0.288136     0.211280     0.326687 
    0.500000     0.412897     0.089688     0.732776    171      8    981    296     74      0      0      0      0    104   1962     -1   1530     2.061000     1.821119     1.970726     0.069651    -0.014637     0.772360     0.753659    11.100000     0.011059     0.002643     0.004976     0.000615     0.322000     0.020476     0.004894     0.004976     0.002634     0.136000     0.329298     0.241463     0.326369 
    0.500000     0.412897     0.196677     0.764183    283     38    935    234     40      0      0      0      0     24   1962    -32   1530     1.810000     1.489794     1.811111     0.016073    -0.094445     0.813776     0.773611     4.800000     0.004782     0.001143     0.001818     0.000867     0.143000     0.009093     0.002173     0.001818     0.001509     0.082000     0.198547     0.145588     0.269390 
    0.500000     0.412897     0.197132     0.764317    286     31    948    208     57      0      0      0      0     35   1962    -17   1530     1.816000     1.937578     1.924757     0.023440    -0.037621     0.757803     0.759405     5.600000     0.005579     0.001333     0.003859    -0.002027     0.184000     0.011700     0.002796     0.003859     0.000399     0.143000     0.346247     0.253891     0.310880 
    0.500000     0.412897     0.173458     0.757367    237     37    979    227     50      0      0      0      0     28   1962    -34   1530     1.880000     1.677332     1.827391     0.018752    -0.086305     0.790334     0.771576     6.100000     0.006078     0.001453     0.002051    -0.000697     0.154000     0.009793     0.002340     0.002051     0.000822     0.041000     0.099274     0.072794     0.275655 
    0.500000     0.412897     0.210904     0.768360    317     33    909    228     43      0      0      0      0     27   1962    -34   1530     1.769000     1.544882     1.808575     0.018083    -0.095713     0.806890     0.773928     6.300000     0.006277     0.001500     0.001783     0.000331     0.192000     0.012209     0.002918     0.001783     0.001299     0.172000     0.416465     0.305379     0.268403 
    0.500000     0.412897     0.186319     0.761143    262     32    969    221     46      0      0      0      0     24   1962    -24   1530     1.841000     1.622765     1.852932     0.016073    -0.073534     0.797154     0.768383     5.200000     0.005181     0.001238     0.002456     0.000260     0.141000     0.008966     0.002143     0.002456     0.001572     0.152000     0.368039     0.269870     0.285252 
    0.500000     0.412897     0.304120     0.795723    409     62    867    174     18      0      0      0      0    -34   1962    -66   1530     1.562000     1.478120     1.608543    -0.022771    -0.195729     0.815235     0.798932     0.900000     0.000897     0.000214     0.000201    -0.000921     0.018000     0.001145     0.000274     0.000201    -0.001301     0.111000     0.268765     0.197076     0.177610 
    0.500000     0.412897     0.298657     0.794120    395     65    875    168     27      0      0      0      0    -38   1962    -40   1530     1.586000     1.466264     1.725080    -0.025450    -0.137460     0.816717     0.784365     1.700000     0.001694     0.000405     0.000865     0.000122     0.053000     0.003370     0.000805     0.000865     0.000571     0.147000     0.355932     0.260993     0.234025 
    0.500000     0.412897     0.293763     0.792683    381     75    881    169     24      0      0      0      0    -51   1962    -50   1530     1.595000     1.441870     1.674931    -0.034156    -0.162535     0.819766     0.790634     1.700000     0.001694     0.000405     0.000504    -0.000041     0.040000     0.002544     0.000608     0.000504     0.000059     0.135000     0.326877     0.239687     0.211238 
    0.500000     0.412897     0.272024     0.786301    338     78    919    161     34      0      0      0      0    -48   1962    -47   1530     1.657000     1.636068     1.715476    -0.032147    -0.142262     0.795491     0.785566     1.200000     0.001196     0.000286     0.000786    -0.001543     0.032000     0.002035     0.000486     0.000786    -0.000179     0.120000     0.290557     0.213055     0.229803 
    0.500000     0.412964     0.296187     0.793418    391     65    889    159     26      0      0      0      0    -39   1962    -51   1530     1.584000     1.472051     1.665202    -0.026119    -0.167399     0.815994     0.791850     2.100000     0.002092     0.000500     0.000448    -0.000346     0.059000     0.003752     0.000897     0.000448     0.000156     0.099000     0.239709     0.175771     0.206585 
    0.500000     0.412897     0.435238     0.834213    577    115    720    104     14      0      0      0      0   -106   1962    -82   1530     1.257000     1.439476     1.388004    -0.070991    -0.305998     0.820065     0.826500     0.400000     0.000399     0.000095     0.000000    -0.000541     0.011000     0.000699     0.000167     0.000000    -0.000569     0.118000     0.285714     0.209504     0.000000 
    0.500000     0.412897     0.413954     0.827965    547    109    742    107     25      0      0      0      0    -86   1962    -66   1530     1.316000     1.741016     1.547631    -0.057596    -0.226185     0.782373     0.806546     0.900000     0.000897     0.000214     0.000061    -0.003371     0.028000     0.001780     0.000426     0.000061    -0.001627     0.146000     0.353511     0.259217     0.141556 
    0.500000     0.412897     0.403141     0.824791    513    124    768    114     11      0      0      0      0   -102   1962    -56   1530     1.337000     1.497707     1.533647    -0.068312    -0.233176     0.812787     0.808294     0.800000     0.000797     0.000190     0.000042    -0.001368     0.024000     0.001526     0.000365     0.000042    -0.001757     0.159000     0.384988     0.282298     0.132233 
    0.500000     0.412897     0.395743     0.822619    500    118    784    109     19      0      0      0      0    -91   1962    -66   1530     1.365000     1.498978     1.499639    -0.060945    -0.250181     0.812628     0.812545     0.500000     0.000498     0.000119     0.000014    -0.001019     0.012000     0.000763     0.000182     0.000014    -0.000313     0.622000     1.506053     1.104336     0.107073 
    0.500000     0.412897     0.405645     0.825526    521    115    772    104     18      0      0      0      0    -94   1962    -69   1530     1.335000     1.495536     1.469844    -0.062954    -0.265078     0.813058     0.816269     0.400000     0.000399     0.000095     0.000003    -0.000999     0.009000     0.000572     0.000137     0.000003    -0.000316     0.118000     0.285714     0.209504     0.080509 
