# Supplementary material
Source: publisher figshare collection journal article supplement (https://frontiersin.figshare.com/ndownloader/files/13649807)
Supplement: Supplementary file 1 [file 13649807 › SupplementaryData-dia-RVE6-CUT50.dat]

   z_x/z_bcc     zeta_ini         zeta     zeta_tot    N_0    N_1    N_2    N_3    N_4    N_5    N_6    N_7    N_8      g  N_J,t  g^(i) N_J,t^(i)     z_avg        z_avg        z_avg         g_V*         g_V*     zeta_tot     zeta_tot            E         E/E0     E/E0,bcc     E/E0,bcc     E/E0,bcc           sy       sy/sy0   sy/sy0,bcc   sy/sy0,bcc   sy/sy0,bcc           nu       nu/nu0   nu/nu0,bcc   nu/nu0,bcc
         [-]          [-]          [-]          [-]    [-]    [-]    [-]    [-]    [-]    [-]    [-]    [-]    [-]    [-]    [-]    [-]    [-]          [-]          [-]          [-]          [-]          [-]          [-]          [-]        [MPa]          [-]          [-]          [-]          [-]        [MPa]          [-]          [-]          [-]          [-]          [-]          [-]          [-]          [-]
         RVE          RVE          RVE          RVE    RVE    RVE    RVE    RVE    RVE    RVE    RVE    RVE    RVE    RVE    RVE    RVE    RVE          RVE         ANN3       ANN3gi          RVE       ANN3gi         ANN3       ANN3gi          RVE          RVE          RVE           MC      MC+ANN3          RVE          RVE          RVE           MC      MC+ANN3          RVE          RVE          RVE           MC
    0.500000     0.402807     0.000000     0.701403     81      0    960    378    111      0      0      0      0    209   1962     27   1530     2.286000     2.027152     2.070611     0.139972     0.035306     0.746606     0.741174    25.500000     0.025406     0.006072     0.008052     0.000821     0.563000     0.035801     0.008556     0.008052     0.003578     0.067000     0.162228     0.118956     0.357984 
    0.500000     0.402740     0.105169     0.732776    188     13    945    313     71      0      0      0      0    119   1962      0   1530     2.043000     1.708276     1.958504     0.079697    -0.020748     0.786465     0.755187    12.800000     0.012753     0.003048     0.004662     0.001587     0.362000     0.023019     0.005502     0.004662     0.003216     0.085000     0.205811     0.150914     0.322314 
    0.500000     0.402807     0.095893     0.730037    169      8    972    310     71      0      0      0      0    123   1962      0   1530     2.069000     1.718769     1.959821     0.082376    -0.020089     0.785154     0.755022    11.200000     0.011159     0.002667     0.004695     0.001507     0.331000     0.021048     0.005030     0.004695     0.003174     0.121000     0.292978     0.214831     0.322753 
    0.500000     0.402807     0.095446     0.729903    168     10    978    298     76      0      0      0      0    122   1962     -3   1530     2.068000     1.845833     1.968584     0.081706    -0.015708     0.769271     0.753927    10.200000     0.010162     0.002429     0.004920     0.000254     0.300000     0.019077     0.004559     0.004920     0.002357     0.031000     0.075061     0.055039     0.325662 
    0.500000     0.402807     0.096901     0.730337    171     13    963    309     74      0      0      0      0    120   1962     -4   1530     2.067000     1.769465     1.954988     0.080367    -0.022506     0.778817     0.755627    10.900000     0.010860     0.002595     0.004573     0.000821     0.327000     0.020794     0.004970     0.004573     0.002663     0.100000     0.242131     0.177546     0.321139 
    0.500000     0.402740     0.102260     0.731908    183      6    967    299     75      0      0      0      0    114   1962      1   1530     2.050000     1.825229     1.977237     0.076349    -0.011382     0.771846     0.752845    10.200000     0.010162     0.002429     0.005149     0.000738     0.264000     0.016787     0.004012     0.005149     0.002771     0.002000     0.004843     0.003551     0.328511 
    0.500000     0.402807     0.192794     0.758971    261     42    937    246     44      0      0      0      0     32   1962    -20   1530     1.850000     1.512415     1.862173     0.021431    -0.068913     0.810948     0.767228     4.200000     0.004185     0.001000     0.002614     0.001460     0.138000     0.008775     0.002097     0.002614     0.002250     0.054000     0.130751     0.095875     0.288657 
    0.500000     0.402807     0.208795     0.763749    297     37    916    234     46      0      0      0      0     32   1962    -27   1530     1.801000     1.574874     1.840734     0.021431    -0.079633     0.803141     0.769908     2.600000     0.002590     0.000619     0.002257     0.000524     0.076000     0.004833     0.001155     0.002257     0.001634     0.115000     0.278450     0.204178     0.280703 
    0.500000     0.402807     0.189437     0.757969    255     40    951    237     47      0      0      0      0     35   1962    -31   1530     1.857000     1.581731     1.828832     0.023440    -0.085584     0.802284     0.771396     5.100000     0.005081     0.001214     0.002073     0.000275     0.184000     0.011700     0.002796     0.002073     0.001415     0.114000     0.276029     0.202402     0.276204 
    0.500000     0.402807     0.202976     0.762011    288     39    913    241     49      0      0      0      0     44   1962    -26   1530     1.820000     1.602208     1.850726     0.029468    -0.074637     0.799724     0.768659     4.300000     0.004284     0.001024     0.002419     0.000424     0.132000     0.008394     0.002006     0.002419     0.001653     0.091000     0.220339     0.161567     0.284433 
    0.500000     0.402807     0.189885     0.758102    256     33    955    242     44      0      0      0      0     33   1962    -22   1530     1.859000     1.521759     1.854841     0.022101    -0.072579     0.809780     0.768145     5.600000     0.005579     0.001333     0.002488     0.001249     0.204000     0.012972     0.003100     0.002488     0.002094     0.039000     0.094431     0.069243     0.285958 
    0.500000     0.402740     0.297494     0.790210    374     92    870    164     30      0      0      0      0    -42   1962    -64   1530     1.597000     1.525382     1.629574    -0.028128    -0.185213     0.809327     0.796303     0.900000     0.000897     0.000214     0.000278    -0.000994     0.025000     0.001590     0.000380     0.000278    -0.000130     0.031000     0.075061     0.055039     0.188777 
    0.500000     0.402740     0.321213     0.797294    433     80    799    193     25      0      0      0      0    -36   1962    -52   1530     1.541000     1.440345     1.692227    -0.024110    -0.153886     0.819957     0.788472     1.200000     0.001196     0.000286     0.000614     0.000048     0.031000     0.001971     0.000471     0.000614    -0.000062     0.046000     0.111380     0.081671     0.219313 
    0.500000     0.402740     0.312038     0.794554    404     80    851    173     22      0      0      0      0    -40   1962    -69   1530     1.561000     1.441460     1.597989    -0.026789    -0.201006     0.819818     0.800251     1.200000     0.001196     0.000286     0.000169    -0.000417     0.043000     0.002734     0.000654     0.000169    -0.000563     0.109000     0.263923     0.193525     0.171792 
    0.500000     0.402807     0.298422     0.790511    378     91    850    181     30      0      0      0      0    -40   1962    -52   1530     1.604000     1.477003     1.690279    -0.026789    -0.154861     0.815375     0.788715     4.000000     0.003985     0.000952     0.000601    -0.000236     0.104000     0.006613     0.001581     0.000601     0.000308     0.033000     0.079903     0.058590     0.218415 
    0.500000     0.402740     0.307675     0.793251    397     78    857    173     25      0      0      0      0    -41   1962    -64   1530     1.576000     1.443636     1.622935    -0.027459    -0.188532     0.819546     0.797133     1.500000     0.001494     0.000357     0.000252    -0.000304     0.040000     0.002544     0.000608     0.000252    -0.000159     0.072000     0.174334     0.127833     0.185309 
    0.500000     0.402807     0.395323     0.819445    487    121    781    124     17      0      0      0      0    -87   1962    -55   1530     1.388000     1.439801     1.571702    -0.058266    -0.214149     0.820025     0.803537     1.100000     0.001096     0.000262     0.000104    -0.000434     0.034000     0.002162     0.000517     0.000104    -0.000419     0.063000     0.152542     0.111854     0.156579 
    0.500000     0.402740     0.417655     0.826094    522    139    747    107     15      0      0      0      0   -110   1962    -78   1530     1.316000     1.440883     1.417693    -0.073670    -0.291153     0.819890     0.822788     0.400000     0.000399     0.000095     0.000000    -0.000540     0.010000     0.000636     0.000152     0.000000    -0.000471     0.053000     0.128329     0.094099     0.000000 
    0.500000     0.402807     0.414233     0.825092    534    111    756    110     19      0      0      0      0    -86   1962    -71   1530     1.326000     1.494577     1.478375    -0.057596    -0.260812     0.813178     0.815203     0.600000     0.000598     0.000143     0.000005    -0.000988     0.016000     0.001017     0.000243     0.000005    -0.000312     0.049000     0.118644     0.086998     0.088731 
    0.500000     0.402807     0.412331     0.824524    521    126    754    116     13      0      0      0      0    -95   1962    -69   1530     1.329000     1.459402     1.474593    -0.063624    -0.262703     0.817575     0.815676     1.000000     0.000996     0.000238     0.000004    -0.000847     0.023000     0.001463     0.000350     0.000004    -0.001174     0.101000     0.244552     0.179321     0.085160 
    0.500000     0.402740     0.395838     0.819579    479    131    786    123     11      0      0      0      0    -92   1962    -64   1530     1.383000     1.521622     1.515618    -0.061615    -0.242191     0.809797     0.810548     0.600000     0.000598     0.000143     0.000025    -0.001747     0.015000     0.000954     0.000228     0.000025    -0.002108     0.012000     0.029056     0.021306     0.119403 
