# Supplementary material
Source: publisher figshare collection journal article supplement (https://frontiersin.figshare.com/ndownloader/files/13649807)
Supplement: Supplementary file 1 [file 13649807 › SupplementaryData-dia-RVE6.dat]

   z_x/z_bcc     zeta_ini         zeta     zeta_tot    N_0    N_1    N_2    N_3    N_4    N_5    N_6    N_7    N_8      g  N_J,t  g^(i) N_J,t^(i)     z_avg        z_avg        z_avg         g_V*         g_V*     zeta_tot     zeta_tot            E         E/E0     E/E0,bcc     E/E0,bcc     E/E0,bcc           sy       sy/sy0   sy/sy0,bcc   sy/sy0,bcc   sy/sy0,bcc           nu       nu/nu0   nu/nu0,bcc   nu/nu0,bcc
         [-]          [-]          [-]          [-]    [-]    [-]    [-]    [-]    [-]    [-]    [-]    [-]    [-]    [-]    [-]    [-]    [-]          [-]          [-]          [-]          [-]          [-]          [-]          [-]        [MPa]          [-]          [-]          [-]          [-]        [MPa]          [-]          [-]          [-]          [-]          [-]          [-]          [-]          [-]
         RVE          RVE          RVE          RVE    RVE    RVE    RVE    RVE    RVE    RVE    RVE    RVE    RVE    RVE    RVE    RVE    RVE          RVE         ANN3       ANN3gi          RVE       ANN3gi         ANN3       ANN3gi          RVE          RVE          RVE           MC      MC+ANN3          RVE          RVE          RVE           MC      MC+ANN3          RVE          RVE          RVE           MC
    0.500000     0.000000     0.000000     0.500000      0      0      0      0   1530      0      0      0      0   1495   1962   1135   1530     4.000000     3.981662     3.962983     1.001239     0.981492     0.502292     0.504627  1003.700000     1.000000     0.239000     0.232560     0.217687    15.726000     1.000000     0.239000     0.232560     0.219629     0.413000     1.000000     0.733265     0.728343 
    0.500000     0.000000     0.099833     0.549916      0      7     85    434   1004      0      0      0      0   1154   1962    864   1530     3.592000     3.626460     3.597301     0.772862     0.798650     0.546692     0.550337   665.600000     0.663146     0.158492     0.171240     0.149058     9.853000     0.626542     0.149743     0.171240     0.144158     0.346000     0.837772     0.614309     0.676377 
    0.500000     0.000000     0.099833     0.549916      0      3     81    432   1014      0      0      0      0   1162   1962    889   1530     3.606000     3.629640     3.619501     0.778220     0.809751     0.546295     0.547562   668.400000     0.665936     0.159158     0.174824     0.152563     9.966000     0.633728     0.151461     0.174824     0.147745     0.344000     0.832930     0.610758     0.679715 
    0.500000     0.000000     0.099833     0.549916      0      4     76    444   1006      0      0      0      0   1159   1962    883   1530     3.603000     3.621793     3.606055     0.776211     0.803028     0.547276     0.549243   673.100000     0.670619     0.160278     0.172650     0.150581    10.009000     0.636462     0.152114     0.172650     0.145570     0.356000     0.861985     0.632064     0.677696 
    0.500000     0.000000     0.099833     0.549916      1      8     72    437   1012      0      0      0      0   1167   1962    884   1530     3.602000     3.626692     3.610780     0.781569     0.805390     0.546664     0.548653   678.400000     0.675899     0.161540     0.173413     0.151226    10.137000     0.644601     0.154060     0.173413     0.146332     0.356000     0.861985     0.632064     0.678406 
    0.500000     0.000000     0.099833     0.549916      0      7     72    446   1005      0      0      0      0   1164   1962    878   1530     3.601000     3.620536     3.599661     0.779560     0.799831     0.547433     0.550042   683.900000     0.681379     0.162849     0.171620     0.149580    10.191000     0.648035     0.154880     0.171620     0.144540     0.349000     0.845036     0.619635     0.676733 
    0.500000     0.000000     0.199933     0.599967      5     38    240    619    628      0      0      0      0    841   1962    625   1530     3.194000     3.151868     3.236159     0.563239     0.618079     0.606017     0.595480   402.400000     0.400917     0.095819     0.116275     0.095778     6.198000     0.394124     0.094196     0.116275     0.093092     0.294000     0.711864     0.521985     0.618330 
    0.500000     0.000000     0.199933     0.599967      4     39    239    612    636      0      0      0      0    837   1962    625   1530     3.201000     3.177336     3.245500     0.560560     0.622750     0.602833     0.594312   401.100000     0.399621     0.095509     0.117606     0.097152     6.241000     0.396859     0.094849     0.117606     0.094242     0.306000     0.740920     0.543291     0.619927 
    0.500000     0.000000     0.199933     0.599967      2     42    215    647    624      0      0      0      0    835   1962    648   1530     3.208000     3.097017     3.227487     0.559220     0.613744     0.612873     0.596564   401.600000     0.400120     0.095628     0.115044     0.094450     6.150000     0.391072     0.093466     0.115044     0.092247     0.289000     0.699758     0.513108     0.616843 
    0.500000     0.000000     0.199933     0.599967      2     37    229    651    611      0      0      0      0    832   1962    627   1530     3.197000     3.067125     3.195922     0.557211     0.597961     0.616609     0.600510   386.100000     0.384677     0.091938     0.110604     0.089956     5.835000     0.371042     0.088679     0.110604     0.088015     0.293000     0.709443     0.520210     0.611389 
    0.500000     0.000000     0.199933     0.599967      3     43    228    629    627      0      0      0      0    834   1962    624   1530     3.199000     3.132934     3.222198     0.558550     0.611099     0.608383     0.597225   401.500000     0.400020     0.095605     0.114295     0.093766     6.190000     0.393616     0.094074     0.114295     0.091247     0.312000     0.755448     0.553943     0.615933 
    0.500000     0.000000     0.299766     0.649883     14    108    418    620    370      0      0      0      0    528   1962    392   1530     2.800000     2.646033     2.816291     0.353615     0.408145     0.669246     0.647964   179.800000     0.179137     0.042814     0.062850     0.042465     3.157000     0.200750     0.047979     0.062850     0.044789     0.216000     0.523002     0.383499     0.540341 
    0.500000     0.000000     0.299766     0.649883     17    112    411    628    362      0      0      0      0    524   1962    377   1530     2.788000     2.622876     2.775777     0.350936     0.387888     0.672140     0.653028   175.400000     0.174753     0.041766     0.058451     0.038301     2.993000     0.190322     0.045487     0.058451     0.040912     0.217000     0.525424     0.385275     0.532092 
    0.500000     0.000000     0.299766     0.649883     12    109    405    647    357      0      0      0      0    525   1962    388   1530     2.803000     2.594752     2.761410     0.351606     0.380705     0.675656     0.654824   200.400000     0.199661     0.047719     0.056926     0.037143     3.227000     0.205202     0.049043     0.056926     0.040094     0.234000     0.566586     0.415458     0.529132 
    0.500000     0.000000     0.299766     0.649883     17    112    409    632    360      0      0      0      0    529   1962    368   1530     2.788000     2.615128     2.755181     0.354284     0.377590     0.673109     0.655602   187.500000     0.186809     0.044647     0.056271     0.036213     3.222000     0.204884     0.048967     0.056271     0.038920     0.241000     0.583535     0.427886     0.527842 
    0.500000     0.000000     0.299766     0.649883     22    126    376    607    399      0      0      0      0    544   1962    406   1530     2.807000     2.716502     2.878843     0.364330     0.439422     0.660437     0.640145   188.300000     0.187606     0.044838     0.069927     0.049120     3.146000     0.200051     0.047812     0.069927     0.050585     0.222000     0.537530     0.394152     0.552803 
    0.500000     0.000000     0.399866     0.699933     38    240    539    524    189      0      0      0      0    232   1962    142   1530     2.383000     2.271737     2.310332     0.155376     0.155166     0.716033     0.711208    54.900000     0.054698     0.013073     0.019424     0.007460     1.226000     0.077960     0.018632     0.019424     0.011181     0.164000     0.397094     0.291175     0.425110 
    0.500000     0.000000     0.399866     0.699933     51    217    530    526    206      0      0      0      0    259   1962    185   1530     2.405000     2.352025     2.412724     0.173459     0.206362     0.705997     0.698410    62.700000     0.062469     0.014930     0.026102     0.012167     1.284000     0.081648     0.019514     0.026102     0.016133     0.138000     0.334140     0.245013     0.450879 
    0.500000     0.000000     0.399866     0.699933     42    240    520    530    198      0      0      0      0    242   1962    157   1530     2.393000     2.307423     2.344798     0.162073     0.172399     0.711572     0.706900    67.800000     0.067550     0.016144     0.021549     0.008735     1.383000     0.087944     0.021018     0.021549     0.012578     0.173000     0.418886     0.307155     0.433951 
    0.500000     0.000000     0.399866     0.699933     33    238    543    521    195      0      0      0      0    220   1962    160   1530     2.397000     2.309252     2.355884     0.147339     0.177942     0.711343     0.705514    50.800000     0.050613     0.012096     0.022259     0.009400     1.088000     0.069185     0.016535     0.022259     0.013249     0.178000     0.430993     0.316032     0.436758 
    0.500000     0.000000     0.399866     0.699933     32    216    543    549    190      0      0      0      0    250   1962    204   1530     2.424000     2.227115     2.401168     0.167431     0.200584     0.721611     0.699854    68.100000     0.067849     0.016216     0.025293     0.014330     1.404000     0.089279     0.021338     0.025293     0.017882     0.201000     0.486683     0.356867     0.448044 
    0.500000     0.000067     0.500000     0.750017    111    379    553    399     88      0      0      0      0    -17   1962    -22   1530     1.983000     1.678666     1.905903    -0.011385    -0.047049     0.790167     0.761762    10.800000     0.010760     0.002572     0.003451     0.000689     0.282000     0.017932     0.004286     0.003451     0.002212     0.216000     0.523002     0.383499     0.304331 
    0.500000     0.000067     0.500000     0.750017     95    386    563    402     84      0      0      0      0    -11   1962    -15   1530     1.996000     1.626290     1.914930    -0.007367    -0.042535     0.796714     0.760634    11.900000     0.011856     0.002834     0.003643     0.001412     0.309000     0.019649     0.004696     0.003643     0.002737     0.216000     0.523002     0.383499     0.307482 
    0.500000     0.000067     0.500000     0.750017     93    384    576    391     86      0      0      0      0    -26   1962    -22   1530     1.995000     1.675867     1.904556    -0.017413    -0.047722     0.790517     0.761931     8.600000     0.008568     0.002048     0.003423     0.000690     0.202000     0.012845     0.003070     0.003423     0.002203     0.169000     0.409201     0.300053     0.303859 
    0.500000     0.000067     0.500000     0.750017     84    391    583    385     87      0      0      0      0    -11   1962    -21   1530     2.000000     1.704171     1.909838    -0.007367    -0.045081     0.786979     0.761270     6.800000     0.006775     0.001619     0.003534     0.000503     0.000000     0.000000     0.000000     0.003534     0.002118     0.146000     0.353511     0.259217     0.305708 
    0.500000     0.000067     0.500000     0.750017    110    365    573    386     96      0      0      0      0     -1   1962    -14   1530     1.995000     1.814750     1.941336    -0.000670    -0.029332     0.773156     0.757333    12.000000     0.011956     0.002857     0.004241    -0.000043     0.288000     0.018314     0.004377     0.004241     0.001954     0.162000     0.392252     0.287624     0.316542 
