# Supplementary material
Source: publisher figshare collection journal article supplement (https://frontiersin.figshare.com/ndownloader/files/13649807)
Supplement: Supplementary file 1 [file 13649807 › SupplementaryData-GA001-RVE6.dat]

   z_x/z_bcc     zeta_ini         zeta     zeta_tot    N_0    N_1    N_2    N_3    N_4    N_5    N_6    N_7    N_8      g  N_J,t  g^(i) N_J,t^(i)     z_avg        z_avg        z_avg         g_V*         g_V*     zeta_tot     zeta_tot            E         E/E0     E/E0,bcc     E/E0,bcc     E/E0,bcc           sy       sy/sy0   sy/sy0,bcc   sy/sy0,bcc   sy/sy0,bcc           nu       nu/nu0   nu/nu0,bcc   nu/nu0,bcc
         [-]          [-]          [-]          [-]    [-]    [-]    [-]    [-]    [-]    [-]    [-]    [-]    [-]    [-]    [-]    [-]    [-]          [-]          [-]          [-]          [-]          [-]          [-]          [-]        [MPa]          [-]          [-]          [-]          [-]        [MPa]          [-]          [-]          [-]          [-]          [-]          [-]          [-]          [-]
         RVE          RVE          RVE          RVE    RVE    RVE    RVE    RVE    RVE    RVE    RVE    RVE    RVE    RVE    RVE    RVE    RVE          RVE         ANN3       ANN3gi          RVE       ANN3gi         ANN3       ANN3gi          RVE          RVE          RVE           MC      MC+ANN3          RVE          RVE          RVE           MC      MC+ANN3          RVE          RVE          RVE           MC
    0.375000     0.000000     0.000000     0.625000      0      0      0   4320      0      0      0      0      0   1945   4752   1945   4320     3.000000     2.107355     2.613656     0.454734     0.306828     0.736581     0.673293   755.200000     1.000000     0.084569     0.042382     0.033325     8.069000     1.000000     0.084569     0.042382     0.034045    -0.002000     1.000000     0.576050     0.497561 
    0.375000     0.000000     0.098519     0.661944      4    117   1031   3168      0      0      0      0      0   1341   4752   1346   4320     2.704000     2.107355     2.578284     0.313521     0.289142     0.736581     0.677714   330.300000     0.437368     0.036988     0.039217     0.030159     4.820000     0.597348     0.050517     0.039217     0.030880     0.032000   -16.000000    -9.216799     0.489678 
    0.375000     0.000000     0.100231     0.662587      3    118   1054   3145      0      0      0      0      0   1318   4752   1319   4320     2.699000     2.107355     2.570693     0.308144     0.285346     0.736581     0.678663   327.300000     0.433395     0.036652     0.038554     0.029496     4.798000     0.594621     0.050287     0.038554     0.030217     0.029000   -14.500000    -8.352724     0.487968 
    0.375000     0.000000     0.099306     0.662240      3    104   1070   3143      0      0      0      0      0   1330   4752   1335   4320     2.702000     2.107355     2.578117     0.310949     0.289059     0.736581     0.677735   334.100000     0.442399     0.037413     0.039202     0.030145     0.000000     0.000000     0.000000     0.039202     0.030865     0.029000   -14.500000    -8.352724     0.489640 
    0.375000     0.000000     0.099861     0.662448      2    109   1070   3139      0      0      0      0      0   1322   4752   1326   4320     2.700000     2.107355     2.574892     0.309079     0.287446     0.736581     0.678139   342.600000     0.453655     0.038365     0.038920     0.029862     0.000000     0.000000     0.000000     0.038920     0.030583     0.036000   -18.000000   -10.368899     0.488915 
    0.375000     0.000000     0.100370     0.662639      3    118   1056   3143      0      0      0      0      0   1316   4752   1321   4320     2.699000     2.107355     2.571943     0.307676     0.285972     0.736581     0.678507   318.300000     0.421478     0.035644     0.038663     0.029605     0.000000     0.000000     0.000000     0.038663     0.030325     0.036000   -18.000000   -10.368899     0.488250 
    0.375000     0.000000     0.198981     0.699618     36    418   1635   2231      0      0      0      0      0    741   4752    756   4320     2.403000     2.107355     2.461296     0.173243     0.230648     0.736581     0.692338   123.900000     0.164062     0.013875     0.029655     0.020597     2.428000     0.300905     0.025447     0.029655     0.021317     0.046000   -23.000000   -13.249148     0.462606 
    0.375000     0.000000     0.200139     0.700052     25    449   1621   2225      0      0      0      0      0    715   4752    731   4320     2.400000     2.107355     2.447594     0.167164     0.223797     0.736581     0.694051   113.000000     0.149629     0.012654     0.028627     0.019570     0.000000     0.000000     0.000000     0.028627     0.020290     0.044000   -22.000000   -12.673098     0.459329 
    0.375000     0.000000     0.199769     0.699913     44    375   1707   2194      0      0      0      0      0    739   4752    750   4320     2.401000     2.107355     2.465266     0.172775     0.232633     0.736581     0.691842   124.000000     0.164195     0.013886     0.029956     0.020898     0.000000     0.000000     0.000000     0.029956     0.021619     0.055000   -27.500000   -15.841373     0.463552 
    0.375000     0.000000     0.199213     0.699705     28    408   1682   2202      0      0      0      0      0    730   4752    737   4320     2.402000     2.107355     2.455757     0.170671     0.227879     0.736581     0.693030   122.900000     0.162738     0.013763     0.029237     0.020179     0.000000     0.000000     0.000000     0.029237     0.020900     0.069000   -34.500000   -19.873722     0.461284 
    0.375000     0.000000     0.200694     0.700260     36    422   1649   2213      0      0      0      0      0    719   4752    731   4320     2.398000     2.107355     2.449953     0.168100     0.224977     0.736581     0.693756   125.400000     0.166049     0.014043     0.028803     0.019745     0.000000     0.000000     0.000000     0.028803     0.020466     0.055000   -27.500000   -15.841373     0.459895 
    0.375000     0.000000     0.298843     0.737066    112    802   1933   1473      0      0      0      0      0    192   4752    214   4320     2.103000     2.107355     2.218028     0.044889     0.109014     0.736581     0.722747    34.800000     0.046081     0.003897     0.014349     0.005291     0.000000     0.000000     0.000000     0.014349     0.006012     0.045000   -22.500000   -12.961123     0.400509 
    0.375000     0.000000     0.299398     0.737274    109    832   1889   1490      0      0      0      0      0    182   4752    210   4320     2.102000     2.107355     2.212924     0.042551     0.106462     0.736581     0.723385    41.900000     0.055482     0.004692     0.014094     0.005037     0.000000     0.000000     0.000000     0.014094     0.005757     0.059000   -29.500000   -16.993473     0.399107 
    0.375000     0.000000     0.301250     0.737969    134    790   1922   1474      0      0      0      0      0    183   4752    220   4320     2.096000     2.107355     2.222711     0.042785     0.111355     0.736581     0.722161    31.800000     0.042108     0.003561     0.014585     0.005528     0.000000     0.000000     0.000000     0.014585     0.006248     0.054000   -27.000000   -15.553348     0.401792 
    0.375000     0.000000     0.298056     0.736771    110    868   1797   1545      0      0      0      0      0    200   4752    227   4320     2.106000     2.107355     2.219964     0.046759     0.109982     0.736581     0.722504    38.700000     0.051245     0.004334     0.014446     0.005389     0.000000     0.000000     0.000000     0.014446     0.006109     0.056000   -28.000000   -16.129398     0.401040 
    0.375000     0.000000     0.299537     0.737326    126    811   1882   1501      0      0      0      0      0    197   4752    215   4320     2.101000     2.107355     2.215623     0.046058     0.107812     0.736581     0.723047    31.600000     0.041843     0.003539     0.014229     0.005171     0.000000     0.000000     0.000000     0.014229     0.005891     0.057000   -28.500000   -16.417423     0.399849 
    0.375000     0.000000     0.400139     0.775052    279   1238   1873    930      0      0      0      0      0   -284   4752   -241   4320     1.800000     2.107355     1.813440    -0.066398    -0.093280     0.736581     0.773320    10.800000     0.014301     0.001209     0.001850    -0.007208     0.000000     0.000000     0.000000     0.001850    -0.006487     0.035000   -17.500000   -10.080874     0.270294 
    0.375000     0.000000     0.399306     0.774740    289   1225   1858    948      0      0      0      0      0   -263   4752   -222   4320     1.802000     2.107355     1.834345    -0.061488    -0.082828     0.736581     0.770707    12.500000     0.016552     0.001400     0.002157    -0.006901     0.000000     0.000000     0.000000     0.002157    -0.006180     0.043000   -21.500000   -12.385073     0.278296 
    0.375000     0.000000     0.398148     0.774306    303   1209   1833    975      0      0      0      0      0   -234   4752   -199   4320     1.806000     2.107355     1.860211    -0.054708    -0.069895     0.736581     0.767474    11.800000     0.015625     0.001321     0.002580    -0.006477     0.000000     0.000000     0.000000     0.002580    -0.005757     0.042000   -21.000000   -12.097048     0.287937 
    0.375000     0.000000     0.400602     0.775226    277   1219   1923    901      0      0      0      0      0   -292   4752   -243   4320     1.798000     2.107355     1.804749    -0.068269    -0.097626     0.736581     0.774406     9.700000     0.012844     0.001086     0.001731    -0.007327     0.000000     0.000000     0.000000     0.001731    -0.006606     0.035000   -17.500000   -10.080874     0.266908 
    0.375000     0.000000     0.400000     0.775000    271   1228   1915    906      0      0      0      0      0   -290   4752   -250   4320     1.800000     2.107355     1.799657    -0.067801    -0.100172     0.736581     0.775043    10.600000     0.014036     0.001187     0.001664    -0.007394     0.000000     0.000000     0.000000     0.001664    -0.006674     0.044000   -22.000000   -12.673098     0.264908 
    0.375000     0.000000     0.499676     0.812378    557   1568   1669    526      0      0      0      0      0   -626   4752   -583   4320     1.501000     2.107355     1.340544    -0.146356    -0.329728     0.736581     0.832432     4.600000     0.006091     0.000515     0.000000    -0.009058     0.000000     0.000000     0.000000     0.000000    -0.008337     0.015000    -7.500000    -4.320374     0.000000 
    0.375000     0.000000     0.498843     0.812066    559   1587   1614    560      0      0      0      0      0   -613   4752   -569   4320     1.503000     2.107355     1.375014    -0.143317    -0.312493     0.736581     0.828123     4.700000     0.006224     0.000526     0.000000    -0.009058     0.000000     0.000000     0.000000     0.000000    -0.008337     0.025000   -12.500000    -7.200624     0.000000 
    0.375000     0.000000     0.500093     0.812535    518   1647   1633    522      0      0      0      0      0   -670   4752   -614   4320     1.500000     2.107355     1.316951    -0.156644    -0.341525     0.736581     0.835381     4.400000     0.005826     0.000493     0.000000    -0.009058     0.000000     0.000000     0.000000     0.000000    -0.008337     0.023000   -11.500000    -6.624574     0.000000 
    0.375000     0.000000     0.498981     0.812118    522   1653   1595    550      0      0      0      0      0   -652   4752   -608   4320     1.503000     2.107355     1.341588    -0.152435    -0.329206     0.736581     0.832302     3.900000     0.005164     0.000437     0.000000    -0.009058     0.000000     0.000000     0.000000     0.000000    -0.008337     0.020000   -10.000000    -5.760499     0.000000 
    0.375000     0.000000     0.499861     0.812448    514   1662   1612    532      0      0      0      0      0   -671   4752   -611   4320     1.500000     2.107355     1.326426    -0.156877    -0.336787     0.736581     0.834197     4.300000     0.005694     0.000482     0.000000    -0.009058     0.000000     0.000000     0.000000     0.000000    -0.008337     0.021000   -10.500000    -6.048524     0.000000 
