# Supplementary material
Source: publisher figshare collection journal article supplement (https://frontiersin.figshare.com/ndownloader/files/13649807)
Supplement: Supplementary file 1 [file 13649807 › SupplementaryData-GA111-RVE6.dat]

   z_x/z_bcc     zeta_ini         zeta     zeta_tot    N_0    N_1    N_2    N_3    N_4    N_5    N_6    N_7    N_8      g  N_J,t  g^(i) N_J,t^(i)     z_avg        z_avg        z_avg         g_V*         g_V*     zeta_tot     zeta_tot            E         E/E0     E/E0,bcc     E/E0,bcc     E/E0,bcc           sy       sy/sy0   sy/sy0,bcc   sy/sy0,bcc   sy/sy0,bcc           nu       nu/nu0   nu/nu0,bcc   nu/nu0,bcc
         [-]          [-]          [-]          [-]    [-]    [-]    [-]    [-]    [-]    [-]    [-]    [-]    [-]    [-]    [-]    [-]    [-]          [-]          [-]          [-]          [-]          [-]          [-]          [-]        [MPa]          [-]          [-]          [-]          [-]        [MPa]          [-]          [-]          [-]          [-]          [-]          [-]          [-]          [-]
         RVE          RVE          RVE          RVE    RVE    RVE    RVE    RVE    RVE    RVE    RVE    RVE    RVE    RVE    RVE    RVE    RVE          RVE         ANN3       ANN3gi          RVE       ANN3gi         ANN3       ANN3gi          RVE          RVE          RVE           MC      MC+ANN3          RVE          RVE          RVE           MC      MC+ANN3          RVE          RVE          RVE           MC
    0.375000     0.000000     0.000000     0.625000      0      0      0   4041      0      0      0      0      0   1611   4866   1611   4041     3.000000     2.107355     2.542127     0.367822     0.271064     0.736581     0.682234   324.700000     1.000000     0.084569     0.036112     0.027054     7.071000     1.000000     0.084569     0.036112     0.027774     0.187000     1.000000     0.576050     0.481479 
    0.375000    -0.000049     0.100373     0.662623      3    109    988   2941      0      0      0      0      0   1046   4866   1082   4041     2.699000     2.107355     2.500248     0.238822     0.250124     0.736581     0.687469   174.800000     0.538343     0.045527     0.032682     0.023624     3.904000     0.552114     0.046692     0.032682     0.024345     0.199000     1.064171     0.613016     0.471798 
    0.375000     0.000000     0.099691     0.662384      2    113    981   2945      0      0      0      0      0   1047   4866   1086   4041     2.700000     2.107355     2.501409     0.239050     0.250704     0.736581     0.687324   183.100000     0.563905     0.047689     0.032775     0.023717     4.009000     0.566964     0.047948     0.032775     0.024437     0.163000     0.871658     0.502118     0.472069 
    0.375000     0.000000     0.099053     0.662145      3     93   1009   2936      0      0      0      0      0   1057   4866   1093   4041     2.702000     2.107355     2.506164     0.241333     0.253082     0.736581     0.686730   179.300000     0.552202     0.046699     0.033155     0.024098     3.922000     0.554660     0.046907     0.033155     0.024818     0.169000     0.903743     0.520601     0.473178 
    0.375000     0.000000     0.099004     0.662127      3    101   1003   2934      0      0      0      0      0   1047   4866   1084   4041     2.700000     2.107355     2.502356     0.239050     0.251178     0.736581     0.687205   173.500000     0.534339     0.045189     0.032850     0.023793     3.774000     0.533729     0.045137     0.032850     0.024513     0.165000     0.882353     0.508279     0.472290 
    0.375000     0.000000     0.101016     0.662881      3    126    958   2954      0      0      0      0      0   1042   4866   1077   4041     2.698000     2.107355     2.495777     0.237908     0.247889     0.736581     0.688028   172.200000     0.530336     0.044850     0.032326     0.023269     3.795000     0.536699     0.045388     0.032326     0.023989     0.162000     0.866310     0.499038     0.470752 
    0.375000    -0.000049     0.199617     0.699842     38    414   1473   2116      0      0      0      0      0    528   4866    596   4041     2.402000     2.107355     2.386347     0.120552     0.193174     0.736581     0.701707    83.700000     0.257776     0.021800     0.024276     0.015218     1.949000     0.275633     0.023310     0.024276     0.015939     0.145000     0.775401     0.446670     0.444382 
    0.375000    -0.000049     0.200451     0.700155     43    387   1530   2081      0      0      0      0      0    515   4866    584   4041     2.398000     2.107355     2.385021     0.117584     0.192511     0.736581     0.701872    76.200000     0.234678     0.019847     0.024186     0.015128     1.877000     0.265450     0.022449     0.024186     0.015849     0.167000     0.893048     0.514440     0.444052 
    0.375000     0.000000     0.200608     0.700228     38    388   1546   2069      0      0      0      0      0    507   4866    575   4041     2.397000     2.107355     2.381517     0.115758     0.190759     0.736581     0.702310    68.800000     0.211888     0.017919     0.023950     0.014892     1.694000     0.239570     0.020260     0.023950     0.015612     0.150000     0.802139     0.462072     0.443182 
    0.375000     0.000000     0.197125     0.698922     27    371   1598   2045      0      0      0      0      0    511   4866    589   4041     2.401000     2.107355     2.394555     0.116671     0.197278     0.736581     0.700681    75.900000     0.233754     0.019768     0.024836     0.015779     1.799000     0.254419     0.021516     0.024836     0.016499     0.151000     0.807487     0.465153     0.446414 
    0.375000     0.000000     0.199382     0.699768     26    378   1601   2036      0      0      0      0      0    496   4866    556   4041     2.397000     2.107355     2.375318     0.113246     0.187659     0.736581     0.703085    75.200000     0.231598     0.019586     0.023534     0.014477     1.767000     0.249894     0.021133     0.023534     0.015197     0.099000     0.529412     0.304968     0.441636 
    0.375000     0.000000     0.302164     0.738311     95    771   1825   1350      0      0      0      0      0     -5   4866     94   4041     2.096000     2.107355     2.131443    -0.001142     0.065721     0.736581     0.733570    21.400000     0.065907     0.005574     0.010387     0.001330     0.641000     0.090652     0.007666     0.010387     0.002050     0.112000     0.598930     0.345014     0.376067 
    0.375000     0.000000     0.297307     0.736490    106    769   1771   1395      0      0      0      0      0     31   4866    135   4041     2.102000     2.107355     2.161935     0.007078     0.080968     0.736581     0.729758    27.900000     0.085925     0.007267     0.011696     0.002638     0.000000     0.000000     0.000000     0.011696     0.003359     0.032000     0.171123     0.098575     0.384839 
    0.375000     0.000000     0.300692     0.737759     96    788   1779   1378      0      0      0      0      0      5   4866    108   4041     2.098000     2.107355     2.141195     0.001142     0.070598     0.736581     0.732351    21.600000     0.066523     0.005626     0.010796     0.001738     0.000000     0.000000     0.000000     0.010796     0.002458     0.105000     0.561497     0.323450     0.378893 
    0.375000    -0.000049     0.299303     0.737226     99    767   1805   1370      0      0      0      0      0     15   4866    119   4041     2.100000     2.107355     2.150725     0.003425     0.075362     0.736581     0.731159    20.700000     0.063751     0.005391     0.011204     0.002146     0.597000     0.084429     0.007140     0.011204     0.002867     0.135000     0.721925     0.415865     0.381636 
    0.375000    -0.000049     0.303032     0.738624    113    765   1761   1402      0      0      0      0      0     35   4866    150   4041     2.102000     2.107355     2.173578     0.007991     0.086789     0.736581     0.728303    27.400000     0.084386     0.007136     0.012220     0.003162     0.757000     0.107057     0.009054     0.012220     0.003883     0.143000     0.764706     0.440509     0.388140 
    0.375000     0.000000     0.397047     0.773892    253   1161   1755    872      0      0      0      0      0   -384   4866   -268   4041     1.803000     2.107355     1.774494    -0.087674    -0.112753     0.736581     0.778188     7.100000     0.021866     0.001849     0.001356    -0.007702     0.207000     0.029275     0.002476     0.001356    -0.006981     0.219000     1.171123     0.674625     0.254834 
    0.375000     0.000000     0.399254     0.774720    250   1174   1754    863      0      0      0      0      0   -403   4866   -294   4041     1.799000     2.107355     1.748629    -0.092013    -0.125686     0.736581     0.781421     6.400000     0.019711     0.001667     0.001081    -0.007976     0.190000     0.026870     0.002272     0.001081    -0.007256     0.130000     0.695187     0.400463     0.244123 
    0.375000     0.000000     0.399107     0.774665    247   1177   1750    867      0      0      0      0      0   -399   4866   -282   4041     1.801000     2.107355     1.760482    -0.091099    -0.119759     0.736581     0.779940     7.000000     0.021558     0.001823     0.001202    -0.007856     0.209000     0.029557     0.002500     0.001202    -0.007135     0.172000     0.919786     0.529843     0.249078 
    0.375000    -0.000049     0.397763     0.774150    241   1178   1758    864      0      0      0      0      0   -397   4866   -286   4041     1.803000     2.107355     1.756031    -0.090643    -0.121984     0.736581     0.780496     6.200000     0.019095     0.001615     0.001156    -0.007902     0.170000     0.024042     0.002033     0.001156    -0.007182     0.163000     0.871658     0.502118     0.247227 
    0.375000    -0.000049     0.399872     0.774941    242   1194   1749    856      0      0      0      0      0   -422   4866   -296   4041     1.797000     2.107355     1.744729    -0.096351    -0.127635     0.736581     0.781909     6.100000     0.018787     0.001589     0.001043    -0.008014     0.191000     0.027012     0.002284     0.001043    -0.007294     0.155000     0.828877     0.477475     0.242474 
    0.375000    -0.000049     0.495928     0.810964    526   1486   1487    542      0      0      0      0      0   -664   4866   -520   4041     1.506000     2.107355     1.397677    -0.151604    -0.301162     0.736581     0.825290     2.700000     0.008315     0.000703     0.000000    -0.009058     0.084000     0.011880     0.001005     0.000000    -0.008337     0.153000     0.818182     0.471314     0.000000 
    0.375000     0.000000     0.499632     0.812362    486   1537   1526    492      0      0      0      0      0   -725   4866   -600   4041     1.501000     2.107355     1.302623    -0.165531    -0.348688     0.736581     0.837172     2.300000     0.007083     0.000599     0.000000    -0.009058     0.076000     0.010748     0.000909     0.000000    -0.008337     0.140000     0.748663     0.431267     0.000000 
    0.375000     0.000000     0.496787     0.811295    495   1503   1551    492      0      0      0      0      0   -700   4866   -560   4041     1.505000     2.107355     1.329996    -0.159823    -0.335002     0.736581     0.833750     2.600000     0.008007     0.000677     0.000000    -0.009058     0.085000     0.012021     0.001017     0.000000    -0.008337     0.182000     0.973262     0.560648     0.000000 
    0.375000    -0.000049     0.493966     0.810228    508   1504   1515    514      0      0      0      0      0   -692   4866   -557   4041     1.504000     2.107355     1.349491    -0.157997    -0.325255     0.736581     0.831314     2.500000     0.007699     0.000651     0.000000    -0.009058     0.081000     0.011455     0.000969     0.000000    -0.008337     0.134000     0.716578     0.412784     0.000000 
    0.375000     0.000000     0.501104     0.812914    497   1530   1512    502      0      0      0      0      0   -719   4866   -571   4041     1.500000     2.107355     1.330262    -0.164161    -0.334869     0.736581     0.833717     2.300000     0.007083     0.000599     0.000000    -0.009058     0.076000     0.010748     0.000909     0.000000    -0.008337     0.155000     0.828877     0.477475     0.000000 
